1 Epstein-Barr virus nuclear antigen EBNA-LP is essential for transforming naive B cells,  
2 and facilitates recruitment of transcription factors to the viral genome.

3

4 Agnieszka Szymula<sup>1#a</sup>, Richard D Palermo<sup>1</sup>, Ian J Groves<sup>1#b</sup>, Mohammed Ba abdullah<sup>1</sup>,  
5 Beth S Holder<sup>2</sup> and Robert E. White<sup>1\*</sup>.

6

7 <sup>1</sup> Section of Virology or <sup>2</sup>Section of Pediatrics, Department of Medicine, Imperial College  
8 London, London, United Kingdom.

9 <sup>#a</sup> Division of Infectious Diseases, Department of Medicine, Brigham and Women's  
10 Hospital, Harvard Medical School, Boston, Massachusetts, United States of America.

11 <sup>#b</sup> Current address: Department of Pathology, Tennis Court Road, Cambridge, CB2  
12 1QP, United Kingdom

13

14

15 \* Corresponding author:

16 Email: [robert.e.white@imperial.ac.uk](mailto:robert.e.white@imperial.ac.uk)

17

18 Running Title: Genetic analysis of EBNA-LP function

19

20

21

22

## Abstract

23 The Epstein-Barr virus (EBV) nuclear antigen leader protein (EBNA-LP) is the first viral  
24 latency-associated protein produced after EBV infection of resting B cells. Its role in B  
25 cell transformation is poorly defined, but it is reported to enhance gene activation by the  
26 EBV protein EBNA2 in vitro.

27 We generated two sets of EBNA-LP knockout (LPKO) EBVs containing a STOP  
28 codon within each repeat unit of IR1. Intronic mutations in the first of these knockouts  
29 suggested a role for the EBV sisRNAs in transformation. LPKOs with intact introns  
30 established lymphoblastoid cell lines (LCLs) from adult B cells at reduced efficiency, but  
31 umbilical cord B cells, and naive (IgD+, CD27-) adult B cells consistently died  
32 approximately two weeks after infection with LPKO, failing to establish LCLs.

33 Quantitative PCR analysis of virus gene expression after infection identified both  
34 an altered ratio of the EBNA genes, and a dramatic reduction in transcript levels of both  
35 EBNA2-regulated virus genes (LMP1 and LMP2) and the EBNA2-independent EBER  
36 genes, particularly in the first 1-2 weeks. By 30 days post infection, these levels had  
37 equalised. In contrast, EBNA2-regulated host genes were induced efficiently by LPKO  
38 viruses. Chromatin immunoprecipitation revealed that recruitment of EBNA2 and the  
39 host factors EBF1 and RBPJ to all latency promoters tested was severely delayed,  
40 whereas these same factors were recruited efficiently to several host genes, some of  
41 which exhibited increased EBNA2 recruitment.

42 We conclude that EBNA-LP does not simply co-operate with EBNA2 in activating  
43 gene transcription, but rather facilitates the recruitment of several transcription factors to  
44 the viral genome, to enable transcription of virus latency genes. Additionally, our

45 findings suggest that different properties of EBV may have differing importance in  
46 transforming different B cell subsets.

47

48 **Author summary**

49 Epstein-Barr virus (EBV) infects almost everyone. Once infected, people harbor the  
50 virus for life, shedding it in saliva. Infection of children is asymptomatic, but a first  
51 infection during adolescence or adulthood can cause glandular fever (mono). EBV is  
52 also implicated in several different cancers. EBV infection of B cells (the immune cell  
53 that produces antibodies) can drive them to replicate almost indefinitely  
54 ('transformation'), generating cell lines. We have investigated the role of a virus protein  
55 – EBNA-LP – which is thought to support gene activation by the essential virus protein  
56 EBNA2.

57 We have made an EBV in which the EBNA-LP gene has been disrupted. This virus  
58 (LPKO) shows several properties. 1. It is reduced in its ability to transform adult cells,  
59 while immature B cells (more frequent in the young) die two weeks after LPKO infection.  
60 2. Some virus genes fail to turn on immediately after LPKO infection. 3. Binding of  
61 EBNA2 to these genes is delayed, as is binding of some cellular factors. 4. EBNA-LP  
62 does not affect EBNA2-targeted cellular genes in the same way.

63 This shows that EBNA-LP is more important in immature cells, and that it regulates  
64 virus genes – but not host genes – more widely than simply through EBNA2.

65

66

67

## INTRODUCTION

68

69

70

71

72

73

74

75

76

77

78

79

Epstein-Barr virus is a ubiquitous human herpesvirus that asymptotically infects the vast majority of the human population, particularly in the developing world, where primary infection typically occurs during the first few years of life, leading to lifelong EBV latency. Where primary infection is delayed into adolescence or adulthood, it can result in the temporarily debilitating but relatively benign condition, infectious mononucleosis. The major disease burden caused by EBV is the range of malignancies with which it has been associated. In particular EBV contributes to high levels of Burkitt lymphoma in sub-Saharan Africa and of nasopharyngeal carcinoma in southeast Asia, as well as around half of Hodgkin lymphoma cases, approximately one in ten gastric cancers, a range of B cell lymphomas in the immunosuppressed and more rarely with T and NK cell malignancies. Taken together EBV is implicated in around 1-1.5% of worldwide cancer incidence [1].

80

81

82

83

84

85

86

87

88

89

These diverse malignancies likely arise due to defects at different stages of the virus life cycle, or perhaps infection of cell types not involved in the virus's natural life cycle [2]. The core of the EBV lifecycle occurs with the B cell compartment. EBV infection activates B cells, transforming them into proliferating lymphoblasts. In vitro these continue to proliferate into lymphoblastoid cell lines (LCLs) whereas in vivo they can differentiate - probably via a germinal center - into resting memory B cells where the virus is quiescent, producing RNAs but no viral proteins [3,4]. LCLs express the 'growth' program of EBV genes (latency state III), comprising six EBV nuclear antigens (EBNAs), the latency membrane proteins (LMP1, LMP2A and LMP2B) and a number of EBV encoded RNAs, including the abundant nuclear RNAs EBER1 and EBER2.

90           The latency III transcriptional program takes over 2 weeks to reach this state [5].  
91   The first EBV proteins detectable after primary infection are EBNA2 and the EBNA  
92   leader protein (EBNA-LP) [6,7]. Shortly after this the EBNA3 proteins also become  
93   detectable [6], and the EBNAs rapidly reach the levels found in LCLs. In contrast, the  
94   LMP proteins take up to three weeks to reach LCL-like levels [5] and it has been  
95   proposed that the EBNA-normal/LMP-low transcription state that exists early after  
96   infection should be regarded as a new latency state - latency IIb [8]. EBNA transcription  
97   is initiated at multiple copies of Wp, the promoter in the major internal repeat (IR1) of  
98   EBV. Soon after infection, the burden of EBNA transcription shifts to Cp, a promoter  
99   upstream of IR1. Transcripts from both Cp and Wp are alternatively spliced, and  
100   translated in both cap- and IRES dependent manners to produce the six EBNAs.

101           The functions of most of the EBNAs are reasonably well understood: EBNA1 is  
102   important for the replication and segregation of the viral genome during the cell cycle,  
103   by binding to oriP. The EBNA1/oriP complex is also important in the switch from Wp to  
104   Cp [9]. EBNA2 is essential for the initial transformation of B cells, rapidly activating both  
105   host and viral genes through recruitment to promoters or enhancers alongside cellular  
106   transcription factors such as Pu.1 [10], RBPJ (also called CBF1) [11],[12], IRF4 and  
107   EBF1 [13,14]. The EBNA3 proteins are slow-acting transcriptional repressors that are  
108   important for suppressing senescence and apoptosis around 3 weeks after infection  
109   [15,16]. Notably, the EBNA3s and EBNA2 appear to have a close relationship with each  
110   other, co-regulating genes and being bound at the same chromosomal location [13,17-  
111   19].

112 In contrast to the other EBNA<sub>s</sub>, however, the role played by EBNA-LP in B cell  
113 transformation is not known. Through initiation at different W<sub>p</sub> promoters and exon  
114 skipping in Cp transcripts, the EBNA-LP protein comprises a variable copy number of a  
115 66 amino-acid N terminal repeat domain (encoded by exons W1 and W2 within IR1) and  
116 a C terminal domain encoded by exons Y1 and Y2. In LCLs, EBNA-LP mainly localizes  
117 to PML nuclear bodies (ND10) [20] although it takes several days after infection to  
118 accumulate there [21]. Functionally, EBNA-LP has been shown to enhance the  
119 activation of host and viral genes by EBNA2 after transfection, although not all studies  
120 agree on which genes are affected [7,22-26].

121 The complex repetitive nature of the EBNA-LP gene makes its analysis in the  
122 viral context challenging. Previous genetic analyses of EBNA-LP have been restricted to  
123 mutation of the C-terminal Y exons [27,28]. These Y domain knockout viruses establish  
124 LCLs at a much reduced efficiency, and then only when the early outgrowth of the cell  
125 lines was supported by growth on irradiated fibroblast feeder cells. Deleting increasing  
126 numbers of IR1 repeat units below five progressively reduced transformation efficiency  
127 [29], but as well as changes to maximum EBNA-LP size, this decrease could be due to  
128 the reduced W<sub>p</sub> number producing less of the EBNA proteins (particularly EBNA2) or of  
129 the recently identified stable intronic RNAs (sisRNA1 and sisRNA2) that are produced  
130 from the introns between W exons [30].

131 These prior studies of EBNA-LP function have been conducted in the context of  
132 transfecting isolated genes, and/or in the presence of the truncated EBNA-LP protein  
133 produced by the P3HR1 virus, and not in the context of virus infection. Therefore, the  
134 aim of this project was to produce a complete EBNA-LP knockout virus, and use it to

## Genetic analysis of EBNA-LP function

7

135 establish the importance of (and a role for) EBNA-LP in the transformation of B cells.  
136 While our first EBNA-LP knockout was additionally defective due to mutations in the  
137 introns between the EBNA-LP exons, a second, cleaner knockout showed that EBNA-  
138 LP is important but dispensable for the transformation of adult memory B cells, but is  
139 essential for the transformation of naïve B cells. Furthermore, both knockouts  
140 demonstrated that EBNA-LP is crucial for establishing and stabilizing the viral  
141 transcription program after infection, probably through facilitating the recruitment of  
142 EBNA2 and the host protein EBF1 to the incoming virus genome. However, EBNA-LP  
143 did not enhance the induction of host genes by EBNA2 during infection.  
144

## RESULTS

145

### 146 **Generation and validation of EBNA2- and EBNA-LP-deficient BACs.**

147       Because of the multiple copies of Wp, and the alternative splicing of the EBNA-  
148 LP transcript, the only valid approach to completely knockout EBNA-LP was to  
149 introduce a nonsense mutation into the EBNA-LP coding region – with a PvuI restriction  
150 site to help screening – (Fig 1A) into each of the IR1 repeat units of EBV. This was done  
151 initially using class IIS restriction enzymes to generate an array of 6.6 mutated IR1  
152 repeat units (Fig S1), the same size as in the parental EBV BAC (designated wild-type  
153 (WT)-HB9), and matching the typical size of IR1 in circulating viruses [31]. This  
154 approach necessitated the point mutation of a BsmBI restriction site in the short intron  
155 between exons W1 and W2 (Fig 1A). This mutant IR1 repeat was introduced into the  
156 viral genome using RecA-based recombineering, first deleting IR1 from WT-HB9 and  
157 then introducing the mutant repeat array into the viral genome. This produced the  
158 EBNA-LP-knockout virus LPKO<sup>i</sup>, where ‘i’ denotes the intronic point mutation of the  
159 BsmBI restriction site. A revertant virus (LPrev<sup>i</sup>) was made using a repeat array  
160 containing a wild-type W1 exons (i.e. encoding an intact EBNA-LP), but retaining the  
161 intronic point mutation, to control for any impact of this mutation. Two knockouts and  
162 their revertants were generated independently, as summarized in the flow chart (Fig  
163 S1).

164       In order to facilitate comparison with the previous genetic studies of EBNA-LP  
165 function in a P3HR1 strain backbone [27,28], we also generated a pair of recombinant  
166 viruses (designated YKO) that lacked the protein domains of the Y exons but retained  
167 exon Y1 splice acceptor and exon Y2 splice donor (Fig 1B). A revertant (Yrev) was



168 generated for one of these knockouts. In order to separate the role of EBNA2 from that  
169 of EBNA-LP, an EBNA2 knockout (E2KO) EBV – and its revertant, E2rev – were also  
170 generated. E2KO retains the entire Y3 exon and its 3' splice site. This allows qPCR  
171 detection of Y2-YH EBNA2 transcripts in the E2KO, despite being deleted for the rest of  
172 the EBNA2 ORF (Fig 1C). All of the BACs were screened by restriction digestion and  
173 pulsed field gel electrophoresis to ensure they were identical to WT-HB9 except for the  
174 intended modifications (Fig S2).

175 Infectious virus was produced from cell clones produced by transfection of  
176 recombinant BACs into 293 cells. The Burkitt lymphoma cell line BL31 – which we and  
177 others have previously used to establish cell lines for recombinant EBVs that are  
178 deficient in transformation [32,33] – was used to establish cell lines after infection with  
179 each virus. These cell lines did not apparently differ in the splicing of transcripts initiated  
180 at either Cp (Fig S3) or Wp (not shown), other than the expected shortening of  
181 transcripts in YKO cell lines caused by the deletion in the Y1 and Y2 exons. Similarly,  
182 the mutations did not alter the levels of any latency proteins other than those that had  
183 been mutated (Fig 1C and Fig S4). However, the YKO genomes only produced a very  
184 low level of C-terminally truncated EBNA-LP, and neither proteasome inhibition (MG132  
185 treatment), nor analyzing whole cell lysates changed this observation (data not shown).  
186 We also noted a propensity for LP<sup>rev</sup> to produce larger sized and more abundant  
187 EBNA-LP isoforms, and that our EBNA2 knockouts exhibit higher EBNA-LP protein  
188 levels (Fig S4). However, overall it appears that in established BL31 cell lines, knockout  
189 of EBNA-LP does not alter the protein levels of other EBV latency genes.

190

191 **LPKO<sup>i</sup> is unable to transform B cells into LCLs.**

192         Next, the ability of the recombinants to transform adult B cells was assessed.  
193 Under the microscope, uninfected B cells were indistinguishable from those infected  
194 with E2KO (EBNA2 knockouts are known to be completely transformation defective  
195 [34]), whereas LPKO<sup>i</sup>, YKO and revertants all induced an apparent activation of the B  
196 cells within 3 days of infection, characterized by cell enlargement and aggregation into  
197 clumps (Fig 2A). However, these aggregated cell clumps expanded over the next few  
198 days in the wild-type-infected cells whereas LPKO<sup>i</sup> and YKO cell lines lagged behind in  
199 outgrowth (Fig 2B). We also noted that the expansion of both of the LPrev<sup>i</sup>-infected cells  
200 also lagged somewhat behind the other wild-type infections. Thereafter, YKO, LPrev<sup>i</sup>  
201 and the other wild-type and revertant viruses were all reproducibly able to establish  
202 LCLs.

203         Western blotting of these LCLs confirmed the observation made in BL31 (Fig 1D)  
204 that YKO made only small amounts of truncated EBNA-LP. In contrast, LCLs were only  
205 established twice (in over 30 experiments) after infection with LPKO<sup>i</sup>. One of these was  
206 a spontaneous LCL that lost the LPKO<sup>i</sup> genome during culture. The other was probably  
207 a coinfection between a (presumably) donor-derived virus and LPKO<sup>i</sup>, since it produced  
208 a variant of EBNA-LP that was not from B95-8 (Fig 2B), as well as LPKO<sup>i</sup>-derived  
209 transcripts (identified by cloning and sequencing), and the LPKO<sup>i</sup> genome rescued from  
210 the cells into bacteria was identical to the parental BAC (not shown). Overall, this  
211 suggests that LPKO<sup>i</sup> is unable to transform B cells into LCLs.

212

213 **LPKO<sup>i</sup> supports limited proliferation after infection of naive B cells.**

214 In order to better understand the difference in transformation between the wild-  
215 type, LPKO<sup>i</sup> and E2KO viruses, cell behaviour during the early times after infection was  
216 investigated further. Cell proliferation was tracked by measuring dilution of CellTrace™  
217 Violet over the first 10 days post infection. As previously reported [35] EBV-infected  
218 cells did not divide until after day 3 post infection (Fig S6), during which time cells in the  
219 LPKO<sup>i</sup>, revertant and wild-type infections increased in size and clustered together,  
220 whereas uninfected and E2KO cells remained largely unchanged (data not shown).  
221 From day 5 to 10 post-infection, increasing numbers of proliferated cells were seen in  
222 wild-type and revertant infections (Fig 2C and Fig S6). In contrast, only a few  
223 proliferated cells are apparent in the LPKO<sup>i</sup>-infected populations, while the YKO and  
224 LPrev<sup>i</sup> viruses induced more proliferation than LPKO<sup>i</sup> but less than the wild-type  
225 controls. These observations were consistent for both LPKO<sup>i</sup>/LPrev<sup>i</sup> pairs.

226 This suggests that while EBNA-LP contributes to transformation, it is not required  
227 for many of the activation functions fulfilled by EBNA2, as the E2KO-infected cells were  
228 apparently as inert as uninfected cells. However, there is also some defect in the LPrev<sup>i</sup>  
229 viruses that may also compromise the function of LPKO<sup>i</sup>. This might have been due to  
230 the intronic mutation of the BsmBI restriction site, but resequencing the repeat unit used  
231 to generate LPrev<sup>i</sup> and LPKO<sup>i</sup> revealed that there were three additional non-consensus  
232 nucleotides in the repeat. Analysis of B95-8 genome sequence has now demonstrated  
233 that these changes are found in a single repeat unit within the IR1 of both the WT-HB9  
234 BAC and the original B95-8 cell line (Ba abdullah et al; manuscript submitted for  
235 publication). Furthermore, this one repeat unit also contains an EBNA-LP STOP codon  
236 at the end of exon W1 (Fig S7). Together, this means that none of the viruses described

237 so far (including the widely used B95-8 BAC) have a truly intact IR1: WT-HB9 (plus  
238 E2KO, E2rev, YKO and Yrev) contain 5 intact repeat units, and one with a defective  
239 EBNA-LP exon pair and three non-consensus bases in BWRF1; LPrev<sup>i</sup> contains six  
240 intact EBNA-LP exon pairs, but each repeat also contains four intronic mutations (one  
241 removing BsmBI in the small intron, and the three in BWRF1); in LPKO<sup>i</sup>, each repeat  
242 unit carries these intronic mutations and the stop codons designed into EBNA-LP.

243

244 **LCLs can be established using an improved LPKO-mutant EBV and its wild-type**  
245 **counterpart.**

246 In order to correct for the intronic defect of LPrev<sup>i</sup>, and assess whether it also  
247 altered the behaviour of LPKO<sup>i</sup>, we isolated an IR1 repeat unit that matched the B95-8  
248 consensus sequence, and used it to generate two new repeat arrays – one wild-type  
249 and a second consisting the LPKO mutation described in Fig 1A – using a method  
250 based on Gibson assembly [36] that avoided mutation of the BsmBI restriction site in  
251 the small intron (Fig S8A): all of the IR1 sequence (other than the defined EBNA-LP  
252 mutations) matched the published B95-8 sequence. Both of these repeat arrays were  
253 recombined into the IR1-knock-out that had been used to generate LPKO<sup>i.2</sup> to make  
254 two independent LPKO<sup>w</sup> BACs (where ‘w’ indicates wild-type IR1 backbone) and one  
255 with a wild-type repeat with no heterogeneity (WT<sup>w</sup>) (Fig S1C). These were validated by  
256 pulsed field gel electrophoresis (Fig S8B) and used to generate virus-producing cell  
257 lines.

258 LPKO<sup>w</sup> and WT<sup>w</sup> were used to infect adult B cells and compared with the  
259 previous viruses (Fig 3A and supporting Fig S9). At 8 days post infection it is clear that

260 WT<sup>w</sup> matches (and perhaps exceeds) the transforming capability of the parental wild-  
261 type BAC and revertants, and is considerably superior to LPrev<sup>i</sup>. More interestingly,  
262 LPKO<sup>w</sup> is superior to LPKO<sup>i</sup> in driving infected B cells to undergo proliferation,  
263 approaching the level seen for YKO, suggesting that many of the important functions  
264 lost in LPKO<sup>w</sup> are also missing in the YKO infection.

265 Infection of 10<sup>6</sup> B cells with LPKO<sup>w</sup> at an MOI of 1 rgu/cell consistently induced  
266 expansion for approximately 5-7 days, but then appeared to stagnate for the next 1-2  
267 weeks, after which cells usually proliferated again, and subsequently established LCLs.  
268 The other viruses with reduced transformation efficiency - YKO and LPrev<sup>i</sup> – did not  
269 exhibit this period of lag in growth, and generally established LCLs more quickly than  
270 LPKO<sup>w</sup>. Latency protein levels were largely similar between the LCLs (Fig 3B), with  
271 LPKO<sup>w</sup> LCLs clearly lacking EBNA-LP, and WT<sup>w</sup> showing an elevated level of EBNA-LP  
272 relative to the parental wild-type.

273 The viruses were further validated by immunofluorescence analysis of B cells  
274 infected 48 hours post infection (Fig 3C), although this analysis was complicated by  
275 extra-cellular artefacts detected by anti-mouse Ig secondary antibodies. EBNA2 levels  
276 were similar in infected cells between all of the recombinant viruses (except E2KO,  
277 which – as expected – lacked EBNA2). In contrast, EBNA-LP levels were dramatically  
278 higher in E2KO-infected cells compared to wild-type infections, while the YKO EBNA-LP  
279 was expressed at much lower levels - consistent with western blotting of YKO LCLs and  
280 BL31 cell lines (Fig 2D) - but also appeared to be exclusively nucleolar (Fig 3C). EBNA2  
281 protein levels in LPKO<sup>i</sup>- and LPKO<sup>w</sup>-infected B cells were indistinguishable by  
282 immunofluorescence (not shown).

283

284 **EBNA-LP mutant EBVs are defective in transforming cord blood and naive adult B**  
285 **cells.**

286 We also infected mononuclear cells from umbilical cord blood to try to establish  
287 LCLs. However, we were repeatedly unable to establish cord blood LCLs with either  
288 LPKO<sup>w</sup> virus or the YKO virus, whereas WT-HB9, WT<sup>w</sup> and the more defective LPrev<sup>i</sup> all  
289 established LCLs consistently. The same effect was observed for infection of CD19-  
290 selected B cells from cord blood. In adult lymphocytes, LPKO<sup>w</sup>-infection resulted in  
291 more dying cells (i.e. sub-G1 DNA content) than WT<sup>w</sup> infection, but in cord blood there  
292 were both more dead cells and – by day 11 – far fewer cells in S or G2 phases of the  
293 cell cycle (Fig 4A). By approximately 14 days post infection (precise timing varied with  
294 each donor), just as LPKO<sup>w</sup>-infected adult cells recommence their expansion, there  
295 appear to be no remaining live cells, as any remaining clumps of cells disintegrated and  
296 never recovered. This shows that cord cells arrest and die around 1-2 weeks after  
297 infection with an EBNA-LP-deficient EBV.

298 In order to quantify this effect, we conducted a dilution cloning experiment  
299 comparing transformation of blood from umbilical cord with blood taken at the same  
300 time from the baby's mother. This was performed for three donor pairs, and on each  
301 occasion, both LPKO<sup>w</sup> and YKO viruses consistently failed to transform cord blood,  
302 despite successfully transforming the maternal cells into LCLs (Fig 4B). In contrast, both  
303 the wild type viruses (WT<sup>w</sup> and Yrev/EBV-BAC) and LPrev<sup>i</sup> showed no difference in  
304 transformation efficiency between cord and maternal lymphocytes. We also observed  
305 that WT<sup>w</sup>-infected cells expanded and acidified the media faster than WT-HB9 and Yrev

306 transformations, but produced the same number of LCL-initiating events (not shown).  
307 This demonstrated that the defect in transformation of cord blood is due to the EBNA-LP  
308 mutation, and is not a consequence of a generically reduced transformation  
309 competence.

310 In order to assess whether the cord cell phenotype was linked to the naïve  
311 phenotype of these cells, we used CD27 and IgD status to sort CD19+ve adult cells into  
312 naïve and memory B cell populations and infected them with the EBV strains. Unlike the  
313 comparison of whole adult and cord blood, we observed that for any donor, adult naïve  
314 (CD27-IgD+) B cells transformed less efficiently than either CD27+ve subset, although  
315 there was considerable variation between donors. Nine attempts were made to  
316 generate LPKO LCLs from the naïve subset of six donors, with memory cells and WT<sup>w</sup>  
317 transformations as controls. Eight attempts failed to generate naïve LPKO<sup>w</sup> LCLs. One  
318 donor exhibited an extremely high level of transformation by all viruses. In this case,  
319 widespread cell death was observed in the LPKO<sup>w</sup>-infected naïve cells 2 weeks post  
320 infection, but an LPKO LCL was established. It has previously been shown that IgD  
321 status of LCLs matches that of the initially infected cell population [37]. We therefore  
322 analyzed these LCLs for IgD and CD27 status to compare with the status of the cells as  
323 originally infected. The LPKO LCL that grew from the naïve population was clearly  
324 CD27 positive, whereas all other LCLs tested matched their original phenotype (not  
325 shown), suggesting that this LCL either arose from a mis-sorted memory cell, or  
326 somehow changed its differentiation state after sorting, but was not a naïve LPKO LCL.  
327 Overall this shows EBNA-LP is essential for the transformation of B cells with a naïve  
328 phenotype, both of cord and adult origin.

329

330 **EBNA-LP facilitates the transcription of viral but not host genes.**

331 It has been widely reported that cotransfection of EBNA-LP is able to enhance  
332 the transcription of viral and host genes induced by EBNA2 [7,22-26]. We therefore  
333 undertook qPCR analysis of host and viral transcripts for two independent time courses  
334 studying RNA levels across the first 30 days after infection of CD19 isolated B cells at  
335 an MOI of 2. The EBNA-LP mutant viruses (LPKO<sup>i</sup>, LPKO<sup>w</sup> and YKO) all showed the  
336 similar gene regulation while the cells survived (not shown). The WT-HB9, WT<sup>w</sup>, E2rev,  
337 Yrev and LPrev<sup>i</sup> also generally behaved the same, although LPrev<sup>i</sup> sometimes diverged  
338 on day 30. The data for a representative time course are therefore presented as the  
339 comparison between these two groups (Fig 5 and Fig S10). EBNA2 transcription was  
340 assessed by a qPCR assay extending from exon Y2 to downstream of the exon Y3  
341 splice donor. It therefore detected transcription even in the E2KO virus, which retains  
342 these sequences. EBNA2 transcript levels were very similar across all infections (Fig  
343 5A), except that the E2KO virus had a 10-fold higher level transcript in both the EBNA2  
344 and Wp assays (not shown), which is consistent with the elevated levels of EBNA-LP  
345 protein in E2KO infections (Fig 3C). To our surprise, however, we observed that all  
346 other virus genes tested expressed lower transcript levels in the EBNA-LP mutant group  
347 early after infection. Across a range of viral genes, expression recovers slowly to return  
348 to wild-type levels (Fig 5 and Fig S10).

349 For EBNA transcripts, EBNA-LP makes no difference to Wp activity (Fig S10A),  
350 whereas Cp activity is generally lower in EBNA-LP mutants (Fig S10B). Transcripts for  
351 all three EBNA3s (measured across the U exon/EBNA3 splice junctions) were around



352 one third lower early after infection with the EBNA-LP mutants. This is also true of  
353 E2KO infection, once the higher basal transcription of the Cp/Wp transcripts is  
354 accounted for (Fig 5B and Fig S10C-D).

355 Other viral genes were more dramatically altered in EBNA-LP mutants early after  
356 infection. EBNA2-dependent LMP2A and LMP2B-initiated transcripts, and LMP1 - Fig  
357 5C-E) were at less than 10% of the levels seen in wild-type infections. Total LMP2  
358 levels were generally (but not universally) lower in EBNA-LP mutants, but high in E2KO  
359 (Fig S10E), suggesting LMP2 transcription from the TR promoter may not be  
360 suppressed in these mutants. More surprising was the observation that levels of both  
361 EBV-expressed small RNAs (EBERs) – which are not EBNA2-regulated – were also  
362 much lower in the EBNA-LP mutant infections than wild-type (Fig 5F and Fig S10F). As  
363 the transformed cells grew out, the levels of all of the viral genes returned to equivalent  
364 levels between the groups, although established LPrev<sup>i</sup>-infected cell lines exhibited  
365 elevated levels of LMP1 and Wp transcription (not shown).

366 In contrast to the widespread differences in virus gene expression, EBNA2-  
367 associated host genes showed very little difference between EBNA-LP mutant and wild-  
368 type infections after 2 days. Cyclin D2, which was reportedly enhanced by EBNA-LP [7]  
369 exhibited lower transcript levels on day 9, but not consistently lower on day 2. This is  
370 likely a consequence of slower proliferation, as LPrev<sup>i</sup>-infected cells (which proliferate  
371 more slowly than other wild-type infections) have lower Cyclin D2 levels than other wild-  
372 types. In contrast, MYC levels were not affected by EBNA-LP (Fig S10G-H). EBNA2-  
373 dependent activation of HES1 but not CD21 was sometimes reported to be enhanced  
374 by EBNA-LP [38] [26]. IL7 has been shown to be bound by EBNA2 [14], but is not

375 activated by EBNA2 during infection (Fig 5G). Despite these differences in reported  
376 associations with EBNA2 and EBNA-LP, all three genes show the same pattern of  
377 regulation: they exhibit a consistent increase in transcript levels only on day 9 after  
378 infection with EBNA-LP mutants (Fig 5G, Fig 5H, Fig S10I). This is the opposite effect to  
379 what might be expected if EBNA-LP contributed the enhancement of activation by  
380 EBNA2, casting doubt on this current perception of EBNA-LP function.

381

382 **EBNA-LP facilitates transcription factor recruitment to the LMP promoter.**

383 It has been reported that EBNA-LP can be detected by chromatin  
384 immunoprecipitation at various genomic loci, often in the presence of EBNA2 [39]. We  
385 have attempted to perform EBNA-LP chromatin immunoprecipitation (ChIP), but have  
386 been unable to detect any difference in EBNA-LP ChIP-qPCR signal at either LMP or  
387 Cp promoters between wild-type and EBNA-LP knockout viruses in LCLs or during  
388 primary infections (not shown). Since EBNA2 has been repeatedly shown to regulate  
389 and bind at these genes, the binding of EBNA2 to both known binding sites and  
390 negative control sites was assessed across three 30 day infection time courses.  
391 Differences in EBNA2 binding were sometimes detectable on day 2 (not shown) but the  
392 ChIP showed a much better signal to noise ratio on day 5 post infection. There is a  
393 profound delay in the recruitment of EBNA2 to known transcription factor binding sites  
394 at the LMP2A and LMP1/2B promoters on the LPKO<sup>w</sup> genome compared to WT<sup>w</sup> (Fig 6  
395 and Fig S11). EBNA2 recruitment to its binding site at Cp was modestly reduced in  
396 LPKO<sup>w</sup> infections, but still showed a considerable binding signal. In contrast, EBNA2  
397 was efficiently recruited to host genes IL7 and HES1. Indeed, the LPKO<sup>w</sup> infection

398 consistently showed elevated binding on days 5 and 9, but not at other time points (Fig  
399 6B).

400 EBNA2 does not bind directly to DNA, but rather it is directed to many of its  
401 binding sites by host proteins, in particular the transcription factor RBPJ (also called  
402 RBP-Jk and CBF1). We therefore also assessed binding to these locations. In our time  
403 course, RBPJ binding peaked later than EBNA2 binding, and was slightly (but  
404 consistently) lower in LPKO<sup>w</sup> at day 5 post infection at the LMP promoters but identical  
405 at Cp (Fig 6C). However, no differences were observed at later time points, or on host  
406 genes, suggesting that the apparent lag in RBPJ recruitment to the LPKO<sup>w</sup> genome is  
407 very slight.

408 Recent genome-wide analyses have shown that EBNA2 and RBPJ are often  
409 located with early B cell factor (EBF1) on the genome [39], and that the three proteins  
410 can bind together to chromatin [14]. In addition, EBF1 has two RBPJ-independent  
411 binding sites on the EBV genome, one near to the EBERs and the other near oriP. In  
412 wild-type infections EBF1 binding reached maximal levels at all viral sites between 5  
413 and 9 days post infection, similar to EBNA2, whereas recruitment to both LMP and  
414 EBER/oriP loci were delayed in LPKO<sup>w</sup> infection. Just like EBNA2, EBF1 recruitment to  
415 the LPKO<sup>w</sup> genome was delayed, taking at least two weeks to approach wild-type levels  
416 at all of the viral locations tested. In contrast, EBF1 levels on the IL7 promoter were  
417 similar between LPKO<sup>w</sup> and WT<sup>w</sup> throughout infection.

418 Taken together, these observations showed a widespread failure of the LPKO<sup>w</sup>  
419 virus to support the recruitment of transcription factors to the region of the viral genome  
420 between LMP2A and oriP, with only a slight delay at Cp. In contrast, host genes

421 exhibited accelerated EBNA2 recruitment. These observations match the transcript level  
422 data, with the genes whose activation was most delayed also having a delayed  
423 recruitment of transcription factors. Together this suggests that EBNA-LP is required to  
424 facilitate the recruitment of transcriptional activators to the region of the EBV genome  
425 between LMP2A and oriP, but not for the activation of host genes by EBNA2.  
426  
427

428

## DISCUSSION

429 **We have developed a novel strategy for markerless modification of repeat**  
430 **regions.**

431 The genetic analysis of EBNA-LP function represents a major technical  
432 challenge, due to the repetitive and diverse nature of its gene. Transcription can initiate  
433 at either Cp upstream of IR1, or at Wp within any one of the IR1 repeat units. Previous  
434 approaches to genetically assessing EBNA-LP function have been restricted to either  
435 truncation of the protein by removal of the C terminal Y exons [27,28] or deletion of  
436 increasing numbers of W repeats, which affects Wp numbers and the sisRNAs as well  
437 as EBNA-LP [29]. Our analysis aimed to compare the function of the previously  
438 assessed C-terminally truncated EBNA-LP with a more comprehensive knockout of the  
439 EBNA-LP reading frame.

440 We have described two approaches to generating mutated repeat regions. The  
441 first used type IIS restriction endonucleases, based on a method for generating tandem  
442 repeats [40] that has been used for analyzing gammaherpesvirus terminal repeats to  
443 separate persistence and packaging functions [41,42], and has since been rebranded  
444 as Golden Gate cloning. This method is likely to be effective for some repeats  
445 (particularly those with many repeat units, as it can expand repeat units exponentially),  
446 but the need to mutate the BsmBI restriction site in IR1 (and the fact that this mutation  
447 appears to have detrimentally affected transformation) means that this approach is not  
448 currently useful for modifying IR1.

449 The second approach is novel, using Gibson Assembly [36] to seamlessly  
450 generate an array of 6 repeat units. This strategy is sufficiently controlled that it has the

451 potential to generate any combination of IR1 repeat units in any order: mutations can be  
452 selectively generated in any of the repeat units of IR1, and the array assembled  
453 accordingly. Not only could this be used to mutate an IR1 feature in all of the repeats,  
454 as we have shown for EBNA-LP mutation, but it can also be used to specifically assess  
455 whether features play different roles depending on which repeat unit they are in (i.e.  
456 whether the roles of the first, last or internal repeats may be different). This may be  
457 important to understanding the biology of IR1, as it was reported that the first Wp in the  
458 genome may be more important than the others [43], so understanding the structure  
459 and function of IR1 will require this sort of approach.

460

461 **An intronic mutation causes a transformation defect that is independent of EBNA-**  
462 **LP.**

463 Our initial attempt to assess the function of EBNA-LP proved flawed: LPKO<sup>i</sup> was  
464 severely defective in transformation, and the revertants (LP<sup>rev</sup><sup>i</sup>) were also somewhat  
465 defective. The intronic mutations reduced the proportion of cells that divided after  
466 infection, and caused slower outgrowth. Importantly, the intronic defect was additive to  
467 the LPKO defect, indicating that the intronic mutations exerted their effect independently  
468 of transcription or EBNA-LP function.

469 In our view, it is most likely that the mutation deliberately introduced into the  
470 small intron (from which sisRNA1 is produced) is responsible. The other three changes,  
471 are clustered in the BWRF1 ORF, and normally exist in only one repeat unit of the B95-  
472 8 IR1 (Ba abdullah et al; manuscript submitted for publication). Two of the changes are  
473 also seen as SNPs between virus strains, so are unlikely to have a negative impact on

474 virus fitness. All three variants produced missense changes in the putative BWRF1  
475 ORF, although it remains unclear whether this ORF has a function, having no ATG  
476 initiation codon, no promoter, and being disrupted in around 20% of strains (Ba Abdullah  
477 et al; manuscript submitted for publication). While this region is reported to persist as a  
478 stable RNA (sisRNA2), this has only been detected in the form of elevated levels of  
479 reads in RNA-seq [30]. However, sisRNA2 potentially has features in common with the  
480 alpha-herpesvirus latency-associated transcript (LAT), a spliced, intron-derived RNA  
481 important for establishing latency in neurons (reviewed in [44]).

482 SisRNA1 is better characterized, being detectable by Northern blot, qPCR and  
483 RNA-seq [30]. Generally, sisRNAs appear to be a relatively abundant form of non-  
484 coding RNA, originally identified in *Xenopus* [45], but since found to be widespread in  
485 human and *Drosophila* cells [46,47]. They have been variously proposed to regulate  
486 transcription, translation and sequester other cellular components (reviewed by [48]).  
487 Short exons closely resembling sisRNA1 have been found associated with Argonaute,  
488 and these may repress mRNA translation in a sequence-specific manner [49], which fits  
489 with the observations that sisRNA1 is detectable in oligo-dT-purified RNA [50].

490 It is possible that the intronic mutations could alter splicing profiles. Neither  
491 EBNA-LP nor EBNA2 transcript or protein levels were detectably altered by the intronic  
492 mutations early after infection. However some other viral gene expression may be  
493 altered. For instance, BHRF1 transcripts were recently reported to be spliced between  
494 W1 exons (skipping exon W2) during the lytic cycle, so it remains possible that this  
495 transcript, or some other at yet uncharacterized IR1 splicing pattern during early  
496 infection could be affected. But regardless of their mechanism of action, our

497 observations represent the first evidence that the sisRNAs (or intronic sequences in  
498 IR1) may be functionally important for EBV transformation. Further study is required to  
499 establish which mutation is important, and what its functional consequences and  
500 mechanism may be.

501

502 **EBNA-LP is more important in transformation of naïve B cells.**

503 It is not unheard of for EBV mutants to exhibit different transformation  
504 phenotypes in different B cell subsets, as BZLF1-knockout EBV is better able to  
505 transform germinal center B cells than memory or naïve B cells [51]. Nevertheless, the  
506 difference between naïve and memory cells is still surprising, as (at the transcriptome  
507 level) they are much more similar to each other than to germinal center cells [52]. Since  
508 the death of LPKO-infected naïve cells was consistent for infection of both mixed  
509 lymphocyte and CD19-isolated B cells, the difference must be intrinsic to the B cell  
510 subsets.

511 It is enticing to invoke the differences in transformation between cord, memory  
512 and adult naïve B cells with different viruses as a possible mediator of the different  
513 characters of primary infection in individuals of different ages. The incidence of  
514 infectious mononucleosis during and after adolescence could be a result of different  
515 balances of memory and naïve cells, or differences in the character of the B cells at  
516 different ages. Since only 25% of students that seroconverted at university exhibited  
517 symptoms of infectious mononucleosis [53], the relative numbers of naïve and memory  
518 B cell, or some measure of tonsillar maturity, could be influencing the different severities  
519 of primary infection in these individuals, perhaps on a background of EBNA-LP diversity.



520           Biologically, a number of differences have been reported that separate the  
521 behaviour of memory and naïve cells. We noted a slower outgrowth of LCLs from naïve  
522 than from memory B cells, although this was not seen in a previous study [37].  
523 Interestingly, adult naïve B cells entered cell cycle later than memory cells after CD40L  
524 stimulation [54], and produced fewer cells from such cultures [55]. In cord cells, the  
525 defect is more profound, with CD40 agonism barely inducing any activation markers,  
526 whereas equivalent naïve B cell subsets from adults did respond [56]. Additionally, IgM  
527 crosslinking in cord cells failed to induce ERK1 phosphorylation, in contrast with adult  
528 cells [56], while BCR crosslinking on adult cells induced a larger response in memory  
529 than naïve cells [57]. These observations are most intriguing, since antibody  
530 crosslinking and CD40 activation are mimicked by the LMP proteins [58] whose  
531 expression are delayed in LPKO infections, suggesting that perhaps the deregulation of  
532 LMPs in LPKO may be responsible for this effect, so it would be intriguing to investigate  
533 how LMP1 and LMP2 knockout EBVs behave during transformation of naïve B cells.

534           Other phenotypic differences between naïve and memory cells may also  
535 contribute. For instance, IL2 stimulation enhanced the production of memory cells by  
536 CD40L, but not naïve cells [54], while 95% of cord B cells are negative for the IL2  
537 receptor [56,59]. Naïve B cells also have a much lower level of the anti-apoptotic bcl2  
538 family members MCL-1 and Bcl-x<sub>L</sub> (but not Bcl2 or Bim) than memory cells [60,61],  
539 which may contribute to the apoptotic phenotype of the LPKO<sup>w</sup> naïve cells.

540           Together these reports suggest that naïve and memory B cells are phenotypically  
541 different, both in their response to pro-proliferative signaling and their resistance to  
542 apoptosis. What is less clear is how EBNA-LP overcomes these differences in naïve

543 cells. It has been reported to interact with a complex of tumor suppressors MDM2, p53  
544 and the cyclin-dependent kinase inhibitor p14<sup>ARF</sup> [62], which could influence both  
545 proliferation and apoptosis responses. Alternatively, metabolic stress has been reported  
546 to be an important limitation to B cell transformation, and appears linked to an elevated  
547 EBNA-LP:EBNA3 ratio [63]. Furthermore, both EBNA-LP and EBNA3A have been  
548 shown to bind the prolyl-hydroxylase proteins that influence HIF1a stability, with the  
549 suggestions that this alters the metabolic state of the infected cells [64]. However,  
550 further study is required to understand the biology underlying the difference in  
551 transformation of naïve and memory cells, and to understand whether these differences  
552 are important for the in vivo biology and pathogenesis of EBV.

553

554 **EBNA-LP only enhances the transactivation of genes by EBNA2 in specific**  
555 **circumstances.**

556 The function of EBNA-LP has been linked to EBNA2 because of their co-  
557 expression immediately after infection, and from a series of co-transfection experiments  
558 that appeared to show an enhancement of EBNA2's transactivation function in the  
559 presence of EBNA-LP [7,22,23,25,26,38,65]. These studies demonstrated an ability to  
560 enhance transcription from reporter constructs [23,65], from host genes - most notably  
561 *HES1* and *CCND2* (Cyclin D2) [7,38] - and from EBV promoters repressed in the  
562 latency I transcriptional profile, including *LMP1* [22,26], *Cp* [65] and *LMP2A* [38]. Some  
563 studies have failed to replicate the regulation of some of these genes [26], but activation  
564 of the LMP1/LMP2B bidirectional promoter has been observed consistently. Our  
565 approach differs considerably from the previous ones, both by taking a genetic

566 approach to controlling the presence of EBNA-LP, and by analyzing gene expression in  
567 the context of viral infection rather than using isolated EBV proteins. Overall we have  
568 observed a much more widespread than expected impact of EBNA-LP on viral gene  
569 expression after infection, which contrasts with a delayed and transient impact on host  
570 gene transcript levels.

571         Of the previously studied host genes, we have seen no conclusive effect of  
572 EBNA-LP on *CCND2* transcription, in contrast with a previous report [7]. Notably the  
573 differences in cellular proliferation between 5 and 14 days post infection is more likely a  
574 cause than a consequence of the transcript differences in *CCND2* seen on day 9 (Fig  
575 S10), as it is also seen in LP<sup>rev</sup>. For other EBNA2-induced host genes we have seen  
576 transient but highly reproducible increases in both transcript levels and binding of  
577 transcription factors (EBNA2 and EBF1) to the genes at day 9 post infection with LPKO  
578 viruses. Notably this is the opposite to what is predicted by the EBNA2-enhancement  
579 hypothesis espoused by the previous literature. This increased transcription and EBNA2  
580 binding in LPKO<sup>w</sup> could reflect a genuine co-regulation of the host gene by EBNA-LP  
581 and EBNA2. CHIP-seq analysis of EBNA-LP binding to the genome has suggested that  
582 it can be found associated with EBNA2 [39], and EBNA-LP has been reported to bind to  
583 EBNA2, albeit only when its acidic C-terminus is deleted [66]. Nevertheless, the  
584 transient increase in EBNA2 binding in LPKO<sup>w</sup> infection could simply be a consequence  
585 of excess availability of the EBNA2 that failed to bind to the viral genome. Either way,  
586 these data clearly show that EBNA-LP does not enhance the transactivation of host  
587 genes by EBNA2, as previously claimed, but can contribute to EBNA2 recruitment to  
588 host genes.

589

590 **EBNA-LP has a widespread effect on EBV gene expression.**

591           In contrast to host genes, widespread viral transcription is profoundly delayed in  
592 the absence of EBNA-LP. The EBNA transcripts are all generated from alternative  
593 splicing after transcription initiation at either Wp or Cp promoters. While EBNA2 levels  
594 were not affected by the loss of EBNA-LP, suggesting no change in promoter activity,  
595 the reduced levels of the EBNA3 transcripts downstream suggest that the processing of  
596 the transcripts is different in the LPKO infection. This elevated ratio of upstream to  
597 downstream EBNA3 (as a ratio of EBNA-LP to EBNA3C protein levels) was observed in  
598 cells that have only proliferated 1-3 times after EBV infection [35], and in cells that  
599 arrest after an initial period of proliferation [63]. This could result from either an increase  
600 in polyadenylation after EBNA2, a change in splice site usage, or reduced elongation of  
601 transcripts. Indeed, there is evidence that the elongation complex pTEFb is important  
602 for transcriptional elongation from Cp, but is predicted to be less important for Wp [67],  
603 leading to speculation that elongation of Wp transcripts is less efficient, which would  
604 lead to lower yields of downstream EBNA3. We have seen reduced levels of  
605 downstream transcripts, along with modestly delayed EBNA2 recruitment to and  
606 transcription from Cp in EBNA-LP mutant viruses, which could explain this  
607 phenomenon.

608           A more profound effect was seen on the EBV latency genes between LMP2A and  
609 oriP (see schematic in Fig 6A). Activation of this whole genome region was severely  
610 delayed in LPKO infections, and this correlated with the delayed recruitment of EBF1,  
611 EBNA2 and - albeit less dramatically - RBPJK. The failure to induce transcription of the

612 EBERs demonstrates that EBNA-LP is not simply working through EBNA2, and raises  
613 the question of whether using EBER in situ hybridization to diagnose EBV-positive  
614 malignancies is reliable in all contexts.

615         The region of latency genes from the LMP2A promoter to oriP represents a  
616 coordinately regulated genomic locus. It is flanked by CTCF binding sites [68], and  
617 these loop together to form a transcriptional unit. Disruption of the CTCF site near the  
618 LMP2A promoter can disrupt this loop, consequently reducing LMP gene transcription  
619 and increasing repressive histone and DNA methylation in LCLs [69]. The simplest  
620 interpretation of our data is that EBNA-LP is important for the proper establishment of  
621 this transcriptional unit. By 4 weeks post infection, the LPKO LCLs have reached normal  
622 expression levels of LMPs and EBERs, so there does not appear to be a defect in the  
623 maintenance of the locus once it is established. However, there is a profound delay in  
624 the recruitment of transcription factors. Indeed, EBF1 and RBPJ have been described  
625 as a pioneer factors: transcription factors that are able to access chromatinized DNA  
626 and establish new enhancer regions [14]. However, while EBNA2 and EBF1 are readily  
627 able to access cellular loci in the absence of EBNA-LP, they appear to require it to  
628 efficiently access the incoming EBV genome.

629

### 630 **Possible mechanisms of action of EBNA-LP**

631         The ability of EBNA-LP to enhance EBNA2-dependent gene transcription has  
632 been variously attributed to its ability to bind to Sp100, HDACs 4 and 5 [65], or NCOR  
633 [38]. The binding to Sp100 is interpreted to transiently disrupt PML nuclear bodies  
634 (ND10) early during infection, and thereby evade an as yet undefined antiviral process

635 [21]. EBNA-LP binding to NCOR and HDACs are both reported to sequester these  
636 repressive proteins away from EBNA2-inducible genes, thereby improving  
637 transactivation [38,65]. Any (or a combination) of these remain reasonable hypotheses  
638 as to how EBNA-LP facilitates viral transcription after infection.

639         The major insight that we offer is that the role of EBNA-LP is tied to the  
640 transcription of the incoming DNA. This could involve evasion of the antiviral effects of  
641 ND10, which may be responsible for suppressing transcription of the incoming  
642 genomes. Additionally, retroviral genomes that fail to integrate into the host genome  
643 exhibit increased gene expression in the presence of HDAC inhibitors [70,71],  
644 supporting the idea that inhibition of HDACs by EBNA-LP could also relieve repression  
645 of the incoming viral genome. If such repression were mediated by HDACs (and  
646 perhaps also NCOR), this suggests that EBNA-LP disrupts this process at several  
647 levels.

648         The chromatinization of viral genomes is usually very rapid, and an EBV  
649 tegument protein - BNRF1 - has been identified that binds to Daxx (an ND10  
650 component) and supports histone loading onto incoming genomes [72]. However, an  
651 elegant study has shown that BNRF1 and EBNA-LP have complementary effects in  
652 preventing the suppression of herpesviruses, having a combinatorial effect in helping an  
653 ICP0-null herpes simplex virus to evade the effects of ND10 [73]. It is tempting to  
654 speculate that transcription of Wp is supported by the action of BNRF1, and the EBNA-  
655 LP produced from those transcripts then prevents innate processes from inhibiting the  
656 LMP/EBER/oriP/Cp region of the genome. Considerable experimental effort will be  
657 required to test these hypotheses.

658           Of course, there are other aspects to this genome region that could explain why  
659 its regulation is not like that of Wp/Cp. Notably, this region includes the terminal repeats,  
660 and the virus – linear in the virion – needs to recircularize before LMP2 can be  
661 transcribed, and perhaps before this region is properly regulated. In addition the  
662 terminal repeats contain a binding site for PAX5, which is directed to the viral genome  
663 by EBER2 [74]. Two of the factors reported to bind to the EBER2/PAX5 complex (NONO  
664 and SPFQ) have also been reported to bind to EBNA-LP in a tandem affinity mass  
665 spectrometry experiment [75], although these two proteins both have a high background  
666 signal in such experiments according to the CRAPome repository [76]. Nevertheless, it  
667 is possible that EBNA-LP is involved in PAX5 recruitment to the terminal repeats.

668           The observation that the truncated EBNA-LP in the YKO cells localizes to the  
669 nucleolus suggests a role of this compartment in EBNA-LP function. Certain stimuli  
670 have been reported to induce nucleolar relocalization of EBNA-LP, probably through  
671 interaction with HSP70, or p53 complexes [77,78]. However, the relevance of this  
672 remains obscure. Interpreting the phenotype of the YKO viruses is difficult, as this  
673 mutant also contains the previously unreported STOP codon in one W1 exon. This may  
674 have contributed to the very low level of truncated EBNA-LP, and this level may be low  
675 enough for the virus to be functionally null for EBNA-LP in some of the biological read-  
676 outs. Previous analyses of EBNA-LP truncated viruses either did not report analysis of  
677 EBNA-LP protein levels [27], or failed to detect it [28], although it is unclear whether  
678 their antisera could detect the type 2 EBNA-LP of the parental P3HR1 virus.  
679 Nevertheless, YKO was less defective in the initial transformation and proliferation,

680 despite showing the same apoptotic phenotype in naïve cells, suggesting that the Y  
681 domains are crucial for this latter biological function.

682 In summary, we have undertaken a genetic analysis of EBNA-LP function and  
683 shown that EBNA-LP is important for B cell transformation, and essential for the  
684 transformation of naïve B cells, and that the role of EBNA-LP is far more complex than  
685 the previously proposed cofactor for EBNA2, being particularly important for  
686 establishing the viral transcription program. We also suggest that future analyses of  
687 EBV mutants would be better performed in distinct B cell subsets, as it is clear that  
688 phenotypes can vary considerably according the differentiation state of the infected B  
689 cells, and perhaps also the age of the B cell donor. The observations and genetic  
690 manipulation strategies described herein also extend approaches to study EBNA-LP,  
691 the EBV-sisRNAs and the wider functions of IR1 in the future.

692

693



694

## METHODS

### 695 **Generation of recombinant EBVs.**

696 In order to introduce mutations into IR1, we have devised a strategy for  
697 introducing a constructed IR1 repeat into EBV. This entails first deleting the virus's  
698 endogenous IR1 (to prevent the constructed repeat from recombining with the original  
699 one) and then inserting the rebuilt repeat. To achieve this, we used RecA-mediated  
700 recombineering as previously described [79]. The viral IR1 was deleted by joining  
701 together homology regions from the unique (non-repetitive) sequences flanking IR1:  
702 The upstream region (NC\_007605 positions 11413-12008), which contains exon C2 ,  
703 was cloned Sfil/Pcil from the B95-8 BAC (clone WT-HB9); the downstream region  
704 (position 35239-35869) was cloned XhoI/MluI. This region was introduced by  
705 recombineering in place of IR1. The same homology regions were used as flanks for  
706 newly assembled IR1 repeats containing EBNA-LP mutations.

707 We have used two distinct methods to generate the synthetic IR1. Both  
708 approaches generate an IR1 with 6.6 copies, which is a typical size for circulating EBV  
709 strains [31] and is the size of IR1 in the parental EBV-BAC clone, WT-HB9. In both  
710 cases, the IR1 was assembled in a pBR322-based plasmid in DH5alpha bacteria grown  
711 at 30°C to reduce unwanted recombination.

712 The first approach used to assemble a modified IR3 adapted a strategy that used  
713 type IIs restriction endonucleases to assemble repeats [41]. A BamW fragment was  
714 subcloned from the B95-8-BAC clone WT-HB9 into a vector that contains binding sites  
715 for the type IIb restriction endonucleases BsmBI and BtgZI. These restriction sites were  
716 engineered to both cut at the site of the BamHI restriction site (Fig S1A). A DNA

717 fragment (between the MfeI and AgeI restriction sites in BamW) was synthesized,  
718 containing a point mutation of the BsmBI restriction site in the intron between exons W1  
719 and W2, and also containing mutations that introduced STOP codons and a PvuI  
720 restriction site, for making the EBNA-LP knockout virus, LPKO<sup>i</sup>. A second synthesized  
721 fragment containing the BsmBI mutation but not the EBNA-LP mutation was also  
722 synthesized for producing the revertant virus, LPrev<sup>i</sup>. These fragments were cloned into  
723 the BamW repeat unit, and then both the LPKO<sup>i</sup> and LPrev<sup>i</sup> repeat units were  
724 assembled into an array using the method described in Fig S1B. The array was then  
725 incorporated into independent IR1 knockouts [WKO] according to the scheme shown in  
726 Fig S1C, generating two independent LPKO<sup>i</sup> viruses, and their revertants.

727         Subsequently, recombinant viruses were made that contained changes in IR1  
728 without need to mutate the BsmBI restriction site in the W1-W2 intron. This was  
729 achieved by cloning a new BamW repeat unit that matched the B95-8 consensus  
730 sequence into a pBR322-based plasmid that contained BtgZI restriction sites that cut  
731 the BamHI sites flanking the repeat unit. This was then modified with oligonucleotide  
732 linkers on either (or both) sides of the BamW fragment, such that the BamW sequence  
733 was extended approximately 20bp from the BamHI restriction site (Fig S8A). Additional  
734 constructs were generated by cloning each of the flanking regions (described above)  
735 adjacent to the BamW fragment. To generate the wild-type IR1, the constructs were cut  
736 and assembled as shown in Fig S8A, and the assembly was cloned into pKovKan and  
737 recombined into the WKO.4 that had been used to produce LPKO<sup>i</sup>.2, thereby generating  
738 WT<sup>w</sup>.1 (see Fig S1C). To generate the new EBNA-LP knockout (LPKO<sup>w</sup>) the BsmBI  
739 point mutation in the synthesized LPKO region was reverted to the wild-type sequence

740 by InFusion mutagenesis, and subcloned into the new wild-type BamW fragment. The  
741 IR1 synthetic array was then assembled in the same way as the wild-type array, and  
742 used to independently generate LPKO<sup>w</sup>.2 and LPKO<sup>w</sup>.4 viruses by recombineering into  
743 WKO.4. E2KO, E2rev, YKO and Yrev BACs were generated by RecA-mediated  
744 recombineering essentially as described elsewhere. The precise sequences of the  
745 E2KO and YKO deletions are shown in Fig 1. Revertants were made by reintroducing  
746 wild-type sequence into the knockouts by the same method (Fig S1).

747 BACs were screened for integrity using EcoRI, AgeI, HindIII, NotI and BamHI  
748 restriction digests and run on a CHEF DRII chiller pulsed field gel electrophoresis  
749 system (Bio-Rad). We noted that the family of repeats (FR) region of oriP is smaller in  
750 WT-HB9 than predicted by sequence. This reflects a previous observation that the  
751 family of repeats region (FR) of oriP is unstable, even in BACs, and that the FR in the  
752 p2089 BAC (of which WT-HB9 is a subclone) is 300 bp smaller than the authentic  
753 sequence of B95-8 [80]. Therefore, in addition to restriction digests, all recombinant  
754 BACs were screened by PCR, using the KA2 and KA3 primers [81] with Q5 DNA  
755 polymerase (NEB) to ensure that the FR region was the same size in all recombinants.  
756

#### 757 **Generation of producer cell lines and virus.**

758 Recombinant EBV BAC DNA was purified from bacteria by alkaline lysis followed  
759 by cesium chloride density gradient centrifugation. DNA was assessed by pulsed field  
760 gel electrophoresis to ensure a predominance of intact supercoiled BAC DNA, as DNA  
761 integrity appears to influence the number and quality of producer cell lines. The BAC  
762 DNA was transfected into 293-SL cells (a culture of the HEK-293 cell line provided by

763 Claire Shannon-Lowe; University of Birmingham) using a peptide 6 and lipofectin  
764 transfection reagent described previously [82]. Cells were selected with hygromycin and  
765 colonies isolated by ring cloning. Individual hygromycin-resistant colonies were  
766 screened for GFP expression, for their ability to produce virus. The integrity of episomes  
767 from the producer lines was assessed by recovery into bacteria [83] and analyzed by  
768 restriction digest and pulsed field gel electrophoresis. Cell lines were used if at least  
769 80% of recovered episomes were indistinguishable from the parental BAC.

770 To generate virus stocks, 293-EBV producer cell lines were seeded in 10 cm  
771 dishes and after 1-2 days these were transfected at approximately 25% confluency with  
772 equal quantities of BALF4 and BZLF1-expressing plasmids - 12 µg total DNA per 10  
773 cm plate when transfecting with peptide6+lipofectin or 6 µg per plate using GeneJuice  
774 reagent (Merck-Millipore). Supernatant was harvested after 5 days and filtered through  
775 a 400 nm syringe filter. Virus titer was assayed by infecting  $2 \times 10^5$  Raji cells in 1.5 ml  
776 with 10-fold dilutions of virus. After two days, the Raji cells were treated overnight with  
777 20 ng/ml TPA and 5 mM sodium butyrate to enhance GFP expression in the infected  
778 cells. Cell clumps were dispersed by pipetting and total number of green cells per well  
779 were counted under a fluorescence microscope. This gave a Raji green units (rgu) titer,  
780 which was typically in the range of  $0.5-10 \times 10^5$  rgu/ml in the cell culture supernatant.

781

## 782 **Cell culture, isolation of immune cells and virus infections.**

783 LCLs, BL31 cells (provided by Alan Rickinson, University of Birmingham), and  
784 293-SL cells were grown in RPMI media supplemented with L-glutamine (Life  
785 Technologies) and 10% fetal calf serum. This serum was batch tested for the ability to

786 establish 293-SL-EBV-BAC colonies after BAC transfection, and to support outgrowth of  
787 LCLs under limiting dilution. MRC5 foreskin fibroblasts (ATCC CCL-171), also grown in  
788 RPMI, were irradiated with 50 Gy and seeded as a confluent monolayer to support  
789 outgrowth in some experiments.

790 Adult primary lymphocytes were isolated mainly from buffy-coat residues, but  
791 also from lymphocyte cones, both provided by NHS Blood and Transplant. Cells from a  
792 500 ml original blood volume were diluted to 200 ml with PBS. Lymphocytes were  
793 isolated by layering blood-derivative on ficoll followed by centrifugation. The isolated  
794 peripheral blood leukocytes (PBLs) were washed twice in RPMI/1%FCS. B cells were  
795 purified from PBLs by hybridizing to anti-CD19 microbeads (Miltenyi), using 0.5ml beads  
796 per  $10^9$  PBLs, followed by positive selection (possel program) on an autoMACS  
797 separator (Miltenyi). Either purified B cells or PBLs were resuspended at  $1-2 \times 10^6$   
798 cells/ml in RPMI/15% FCS. B cell purity was measured by FACS for CD20 positivity, and  
799 was typically around 95%.

800 For isolation of different adult B cell subsets, the CD19-sorted B cells were rested  
801 overnight in a cell culture incubator, and then stained with fluorescent antibodies (from  
802 Biolegend) against IgD (PE-CF594, clone IA6-2) and CD27 (PE-Cy7, clone M-T271).  
803 The cells were sorted using a BD FACSAria III (BD Biosciences) into three populations:  
804 naive ( $\text{IgD}^+\text{CD27}^-$ ), class-switched memory ( $\text{IgD}^-\text{CD27}^+$ ) and unswitched memory  
805 ( $\text{IgD}^+\text{CD27}^+$ ). Cell populations were counted and resuspended in RPMI/15% FCS at  
806  $2 \times 10^6$  cells/ml.

807 Isolated PBLs or B cells were infected within a few hours of isolation/purification,  
808 by adding virus at an MOI of 1-2 rgu/B cell, and shaking at  $37^\circ\text{C}$  for 3 hours, after which

809 cells were centrifuged at 200g for 10 minutes and seeded at a density of  $1-2 \times 10^6$   
810 cells/ml in RPMI supplemented with L-glutamine and 15% FCS (batch tested for LCL  
811 outgrowth – GE healthcare or Life Technologies) and either 50 ng/ml (for purified B  
812 cells) or 500 ng/ml (for mixed lymphocytes) of cyclosporin A. During outgrowth,  
813 approximately half of the media volume was replaced every 5-7 days (cyclosporin A was  
814 omitted after two weeks), harvesting up to half of the cells, depending on experiment.

815

### 816 **Transformation assay for maternal and cord umbilical blood.**

817 Blood from the umbilical cord and maternal blood was drawn from healthy full-  
818 term pregnancies. Mononuclear cells were isolated from paired 0.5-2 ml blood samples  
819 of maternal and cord blood by ficoll gradient centrifugation. Variations in the yields of  
820 mononuclear cells meant that different infections were performed with different numbers  
821 of cells: two of the three donors used equal cell numbers for maternal and cord blood  
822 infections ( $3.4 \times 10^5$  and  $1 \times 10^5$  cells per infection). The third pair used  $5 \times 10^4$  maternal  
823 cells, and triplicate infections of  $3 \times 10^5$  cord cells for each virus. For most viruses  
824 (LPKO<sup>w.4</sup>; WT-HB9; WT<sup>w</sup>; LPrev<sup>i</sup>; YKO.4 and Yrev.4)  $10^5$  Raji infectious units were used  
825 for each dilution series. LPKO<sup>w.2</sup> was used at  $10^6$  rgu per dilution series, but this higher  
826 titer showed the same transformation efficiency as LPKO<sup>w.4</sup>.

827 Each infection (and an uninfected control well) was placed in a well of a 96 well  
828 plate, and then serially diluted 2-fold ten times in RPMI/15% FCS/Cyclosporine A  
829 (100ng/ml). Media was changed weekly and after 6 weeks the number (n) of wells  
830 containing LCLs was counted, and number of transforming events per infection  
831 calculated as  $2^{(n-1)}$ .

832

833 **RNA analyses and quantitative reverse transcript PCR.**

834 For the time courses after infection of primary B cells, the cells were  
835 supplemented with an equal volume of fresh media 24 hours prior to harvesting. Then,  
836 half of the culture was taken (typically  $5 \times 10^5$  to  $2 \times 10^6$  cells) and RNA was extracted  
837 using RNeasy mini columns (Qiagen). For all samples in a time course, the same  
838 quantity of RNA (~300ng) was reverse transcribed using either Superscript III First-  
839 Strand Synthesis SuperMix for qRT-PCR (Life Technologies) 3  $\mu$ l cDNA was mixed with  
840 TaqMan gene expression mastermix (Life Technologies) applied to a custom TaqMan  
841 low density array (TLDA) card containing duplicate assays (table ST1), which used  
842 ALAS1, RPLP0, GNB2L1 and 18S RNA as endogenous control genes. EBV TaqMan  
843 assays were designed by Applied Biosystems/Life Technologies using proprietary  
844 software, and validated using B95-8 cDNA. Sequence information is proprietary. The  
845 assay IDs in table ST1 can be used to obtain these assays. The EBNA3 TaqMan assays  
846 were designed spanning the exon junction between the U exon and the first exon of  
847 each EBNA3. LMP exon junctions detected by LMP assays are shown in table ST1.  
848 Additional assays (primers in table ST2) were conducted using Kapa qPCR SYBR kit  
849 (low ROX), and the IL7 TaqMan assay used Takyon low ROX Probe 2X MasterMix  
850 dTTP (Eurogentec) and normalised against ALAS1 and RPLP0. Quantitation of qPCR  
851 data was performed using the delta-delta-Ct method, using DataAssist Software v3.01  
852 (Thermo Fisher Scientific). All quantitation is expressed relative to the level for WT-HB9  
853 on day 2 post infection. Bulk PCR of transcripts across IR1 was performed using Q5

854 polymerase (NEB) and Cp-forward or Wp-forward primers with U-reverse or Y2end-  
855 reverse primers (Table ST2).

856

857 **Chromatin immunoprecipitation (ChIP).**

858 ChIP was carried out using the Chromatin Immunoprecipitation (ChIP) Assay Kit  
859 (Millipore) according to manufacturer's instructions. Briefly,  $2 \times 10^6$  infected B cells were  
860 fixed for 10 minutes in 1% formaldehyde and neutralised with glycine. After two PBS  
861 washes, cells were lysed with SDS Lysis buffer on ice for 10 minutes and sonicated  
862 using the Diagenode UCD-200 Bioruptor for 15 minutes. Precleared chromatin, using  
863 45µl protein A agarose beads was diluted with ChIP dilution buffer and incubated  
864 overnight with primary antibodies against EBNA 2 (Abcam ab90543), EBF1 (Millipore  
865 AB10523), RBPJk (Abcam ab25949) or an IgG control (Sigma). Protein A agarose  
866 beads collected the immune complexes, which were subsequently washed in low salt,  
867 high salt, lithium chloride and twice in TE buffers. The immune complexes were eluted  
868 from the beads using elution buffer and left overnight at 65 degrees. After proteinase K  
869 treatment for 2 hours at 50 degrees, DNA was then purified using the Qiagen QIAQuick  
870 gel extraction kit, and eluted in 120 µl water.

871 Chromatin was quantified by qPCR using the Kapa qPCR SYBR kit (low Rox) on  
872 a QuantStudio7 real time PCR machine (Applied Biosystems). Primers used for ChIP  
873 have been described previously [84] [85] [14] [86] [67], and are listed in table ST3.  
874 Absolute quantity (relative to input) was calculated from standard curves generated from  
875 input DNA that was serially diluted 1:4, four times. 2 µl of ChIP sample was amplified in  
876 triplicate for each qPCR assay.



877

878 **Proliferation assay (cell trace).**

879           Prior to infection, primary cells were resuspended at  $10^6$  cells/ml in PBS  
880 containing 5  $\mu$ M CellTrace Violet (Life Technologies) and incubated for 20 min at 37°C in  
881 dark. This was then diluted 5 times in complete B cell media and incubated for 5 min at  
882 room temperature in the dark. Cells were washed by centrifugation and resuspended in  
883 fresh pre-warmed complete B cell media for infection. We noted that CellTrace violet  
884 staining had a variable propensity to kill primary B cells, so individual tubes were tested  
885 for toxicity by staining PBLs and comparing B cell percentage with and without staining.  
886 Tubes exhibiting less than 50% loss of B cells were used in experiments. For assay,  
887 cells (a volume equivalent to  $10^6$  cells in the initial infection) were harvested on ice and  
888 stained for CD20-PEVio770 (Life Technologies), and resuspended in PBS/1%BSA  
889 containing DRAQ7 live/dead cell stain (BioStatus). Cells were analysed on a FACS  
890 machine (BD LSR II or LSRFortessa) and cell proliferation visualised for live CD20<sup>+</sup>  
891 singlet cells using FlowJo software.

892

893 **DNA fragmentation assay.**

894           Approximately  $10^6$  infected B cells were resuspended in 50  $\mu$ l PBS and added to  
895 450  $\mu$ l of ice cold 70% ethanol and stored until all samples had been harvested (24  
896 hours to 7 days). Cells were pelleted by centrifugation at 500g for 5 minutes, stood in 1  
897 ml PBS for 1 minute, pelleted, and resuspended in 100  $\mu$ l PBS containing 1% triton X-  
898 100 and 1 $\mu$ g/ml DAPI. 30  $\mu$ l of cell suspension was transferred to a NC-Slide A2 and  
899 imaged in a nucleocounter NC-3000 (Chemometec)

900

901 **Western blotting and immunofluorescence.**

902 Western Blotting was performed as described previously, using RIPA lysates and  
903 run and blotted onto nitrocellulose using the mini-Protein systems (Bio-Rad). Antibody  
904 clones used were: EBNA-LP (clones JF186 or 4D3); EBNA2 (Clone PE2); EBNA3A  
905 (Ab16126, Abcam); EBNA3B (Rat monoclonal 6C9 [17]); EBNA3C (mouse monoclonal  
906 A10); LMP1 (monoclonal CS1-4, Dako). For immunofluorescence, cells were grown on  
907 a 12 chamber slide (Ibidi). Cells were gently washed with PBS and then fixed with 4%  
908 paraformaldehyde for 15 minutes. Cells were washed twice with PBS and covered with  
909 blocking buffer (PBS/10% FCS/100mM glycine/0.2% Triton X-100) for 30 minutes. Cells  
910 were stained with primary antibody in 50 µl blocking buffer for one hour, washed thrice  
911 in PBS and stained with fluorophore-conjugated secondary antibody (Cheshire  
912 Bioscience) for an hour. Chambers were washed three times with PBS and then the  
913 chamber removed, the slide briefly dipped in deionized water, and a coverslip mounted  
914 on the slide with Prolong Gold Antifade mount with DAPI (Life Technologies). Slides  
915 were imaged on a Zeiss LSM5 Pascal confocal microscope: 63x objective, 4x digital  
916 zoom and shown as a projection of z-stacks of 1µm sections.

917

918 **Ethics statement**

919 Adult blood cells were purchased from UK National Blood and Transplant as  
920 waste products of platelet isolation. As they are waste products from anonymous  
921 volunteer donors, no ethics approval is required. Umbilical cord blood (and the maternal  
922 blood) were obtained with written informed consent of the mother (an adult) prior to the

923 onset of labour, under the MatImms study, approved by the UK National Health Service  
924 Research Ethics Committee (approval REC 13/LP/1712). Anonymized blood samples  
925 surplus to the requirements of the MatImms study were used in this project, distributed  
926 by the Imperial College Healthcare NHS Trust Tissue Bank (REC 12/WA/0196) and  
927 approved by the tissue bank's Tissue Management Committee (project R15029). Other  
928 investigators may also have received these same samples.  
929

930

## Figure Legends

931 **Fig 1. Construction and validation of EBNA-LP knockouts and their revertants.**

932 Sequence changes introduced in the production of: **A.** EBNA-LP knockout, LPKO<sup>i</sup>, and  
933 the intronic mutation also shared by LPrev<sup>i</sup>; **B.** EBNA2 knockout, E2KO; and **C.** the  
934 EBNA-LP truncation mutant YKO. Protein translations are shown above the nucleotide  
935 sequence, with the initiating methionine of EBNA-LP created by alternative splicing is  
936 shown in square brackets. The nucleotide changes (red) and the introduced PvuI  
937 restriction enzyme site (blue) are indicated. The BsmBI restriction site (green) deleted  
938 by a single T to A nucleotide change in LPKO<sup>i</sup> and LPrev<sup>i</sup> is indicated. **D.** Western  
939 blotting of EBV protein levels in BL31 cells stably infected with the various recombinant  
940 viruses. A and B suffixes indicate independent BL31 cell lines produced from the same  
941 virus.

942 **Fig 2. Both LPKO<sup>i</sup> and LPrev<sup>i</sup> are transformation-defective. A.** CD19-selected adult  
943 B cells were infected with viruses as indicated. Cell activation and transformation as  
944 seen under 10x magnification at the time points indicated (see Fig S5 for more time  
945 points). **B.** Western blots of proteins from LCLs grown out from recombinant EBV  
946 infections. The virus used for the outgrowth is indicated. Initial phase of the outgrowth of  
947 cells was either performed on irradiated MRC5 feeder cells (F) or without feeder cells  
948 (N). The epitope in EBNA-LP recognised by the JF186 antibody exists in B95-8 but is  
949 missing from most virus strains. Antibody 4D3 recognises all known EBNA-LP variants.  
950 **C.** Flow cytometry plots from live CD20-positive cells 7 days after infection of adult B  
951 cells stained with CellTrace violet prior to infection. Degree of dilution of the violet signal  
952 is indicated on the x-axis, indicating number of cell divisions.

953 **Fig 3. Both LPKO<sup>w</sup> and WT<sup>w</sup> are superior in transformation than LPKO<sup>i</sup> and WT**  
954 **BAC respectively. A.** Cell proliferation of live B cells 8 days post-infection, assessed by  
955 dilution of cell trace violet. **B.** Western blotting of viral proteins in LCLs established with  
956 LPKO<sup>w</sup> and WT<sup>w</sup> viruses. **C.** Immunofluorescence analysis of EBNA2 and EBNA-LP  
957 expression 48 hours post infection. Purple arrows indicate extracellular (or pericellular)  
958 foci that are artefacts also seen with the secondary antibody alone. Yellow arrows  
959 indicate nucleolar accumulation of EBNA-LP in YKO infections. The red single channel  
960 image in YKO has been brightened to improve visualisation of the faint nucleolar EBNA-  
961 LP signal. Other channels use the same brightness across the experiment.

962 **Fig 4. EBNA-LP mutants are defective at transforming B cells from cord blood. A.**  
963 Cell cycle profiles of CD19+sorted adult and cord cells infected with WT<sup>w</sup> or LPKO<sup>w</sup>  
964 viruses. Graph shows the DNA quantity per cell (from DAPI staining) **B.** Transformation  
965 efficiencies for each infection were calculated from two-fold dilutions of infected cells  
966 (see Methods). These efficiencies were averaged for each virus group in each cell type  
967 across 3 (maternal – orange bar) or 5 (cord – blue bar) infections per virus. Black lines  
968 indicate the sensitivity of the analysis for each virus – i.e. the efficiency that would occur  
969 if only one well across all of the infections were positive.

970 **Fig 5. Time course for virus and host gene expression after EBNA-LP and EBNA2**  
971 **mutant virus infections.** Graphs show levels of virus and host transcripts as a time  
972 course after infection of resting B cells. Infections are grouped as either ‘wild-type’  
973 (comprising WT-HB9, WT<sup>w</sup>, Yrev, E2rev and LPrev<sup>i</sup>) or EBNA-LP mutants (LPKO<sup>i</sup>,  
974 LPKO<sup>w</sup> and YKO), since these mutants showed consistent phenotypes. These are  
975 compared with E2KO-infected and uninfected cells on day 2, as indicated by the key.

976 Transcript levels (measured by qPCR) are expressed relative to the level for the WT-  
977 HB9 wild-type infection on day 2. Error bars show  $\pm 1$  standard deviation of the gene  
978 level for each group. Note that EBNA2 transcript level in E2KO infection was  $>10$ , so is  
979 omitted. EBNA3A transcript level (B) is therefore shown relative to the EBNA2 transcript  
980 level, since they share promoters. Broken axes (C-E) are used to allow zero values to  
981 be visualised on an otherwise logarithmic axis. For virus transcripts, uninfected B cells  
982 did not show significant levels of viral transcripts (i.e. are effectively zero) so are not  
983 shown.

984 **Fig 6. Binding of EBNA2, RBPJ and EBF1 to viral and host loci.** ChIP analyses of  
985 EBNA2, RBPJK and EBF1 at promoters regulated by EBNA2 in LPKO<sup>w</sup>- and WT<sup>w</sup>-  
986 infected cells. EBV ChIP assays are shown positionally as letters in the schematic **A**.  
987 Data for ChIP of EBNA2 (**B**), RBPJK (**C**), and EBF1 (**D**) are shown for all assays on day  
988 5 post infection with infection with WT<sup>w</sup> (orange) and LPKO<sup>w</sup> (black), and then for IL7,  
989 LMP1 (assay B), LMP2A (assay A) and Cp (assay R).

990

991 **Supporting figure legends.**

992 **Fig S1. Schematic representations of the recombinant viruses used in this**  
993 **project. A.** Method for the construction of LPKO<sup>i</sup> and LPrev<sup>i</sup> viruses. Type IIS restriction  
994 enzyme sites used to assemble repeat arrays were designed to cut at the same site as  
995 BamHI in a pBR322-based plasmid. The BamHI sub-fragment (BamW) was subcloned  
996 into the BamHI site in the orientation indicated. The internal BsmBI restriction site that  
997 was mutated to allow this construction method is outlined by a green box. Other  
998 features of the IR1 repeat are indicated. **B.** Cloning strategy for the assembly of LPKO<sup>i</sup>

999 is shown. LPrev<sup>i</sup> assembly followed an equivalent series of cloning steps. Grey boxes  
1000 indicate BamW fragments, while white boxes indicate the SfiI/BamHI or BamHI/MluI  
1001 regions at the edges of IR1 as shown in A above. Black box within BamW represents  
1002 the mutation of EBNA-LP and the deleted BsmBI restriction site. Plasmid IDs are  
1003 indicated. C and Y indicate the exons at the flanks of the targeting region. **C.** Schematic  
1004 representation of the set of recombineering steps used to generate the recombinant  
1005 EBVs constructed for this study. Identities of viruses as used in the text are in the larger  
1006 font. Below, alternative lab names are included for reference. Coloured names indicate  
1007 recombinant BACs that were used to generate the viruses used in experiments – Green  
1008 names are wild-type in sequence and phenotype; Red names are mutants; LPrev<sup>i</sup> is  
1009 shown in purple, as it contains a point change compared to wild-type that was intended  
1010 to be phenotypically neutral.

1011

1012 **Fig S2. Pulsed field gel analysis of recombinant EBVs.** Analyses show the  
1013 diagnostic digests for the construction of: **A.** LPKO<sup>i</sup> and its revertant LPrev<sup>i</sup>; **B.** E2KO  
1014 and E2rev; **C.** YKO and Yrev. The size standard marker (M) is a 1:1 mixture of BstEII-  
1015 lambda and Lambda mono-cut marker (NEB). **A.** Recombinant LPKO<sup>i</sup> and LPrev<sup>i</sup>  
1016 viruses are identical, including all containing 6.6 IR1 repeats, other than bands altered  
1017 by the inserted PvuI restriction site or removal of BsmBI. Digestion at these sites results  
1018 in conversion of the IR1 band (white arrow) into the 3kb IR1 repeat unit (green arrow)  
1019 and the Cp and Y bands flanking the repeat (yellow arrows). **B.** Size changes in E2KO  
1020 result from introduction of EcoRI and PvuI restriction sites. **C.** YKO mutation produces a  
1021 140bp reduction in band size that is too small to detect in these digests, and an

1022 introduced EcoRI restriction site that causes a more easily observed change (red  
1023 arrows). All other bands are unchanged, demonstrating the integrity of the genome  
1024 outside the intended mutations.

1025 **Fig S3. Western blot validation of EBNA2 knockouts in BL31 cells.** Various western  
1026 blots for EBV proteins in cell lines infected with EBNA2 knockouts and revertants. Each  
1027 lane is identified by the virus recombinant, above the identifier of the 293 cell virus  
1028 producer line, and bottom is the BL31 cell line ID. Each lane therefore represents an  
1029 independent cell line. Note that BL31-E2KO-GK is cell line generated using a different  
1030 EBNA2-knockout EBV by Gemma Kelly and Alan Rickinson [32].

1031 **Fig S4. EBV transcript validation in BL31 cells.** To test whether the splicing of EBNA  
1032 transcripts had been affected by the changes inserted into the viruses, PCRs were  
1033 conducted between the C1 and W0 exons (upstream) and the YH exon downstream to  
1034 compare the transcripts produced by wild-type EBV and the LPKO<sup>i</sup>, LPrev<sup>i</sup>, and YKO  
1035 EBVs. Use of a U exon primer downstream, and transcript analysis in 293-SL producer  
1036 cell lines gave similar results (not shown).

1037 **Fig S5. Transformation of B cells by recombinant viruses.** Photographs of the  
1038 accumulation of transformed cells after infection of CD19-purified B cells by various  
1039 EBV strains, taken on days 2-10 post infection as indicated. Activated cells form clusters  
1040 that then proliferate to differing extents.

1041 **Fig S6. Induction of proliferation by recombinant viruses.** Flow cytometry plots from  
1042 live CD20-positive cells harvested either **A.** 3 days or **B.** 5 days after infection of adult B  
1043 cells stained with CellTrace Violet prior to infection. Degree of dilution of the violet signal



1044 is indicated on the x-axis, indicating number of cell divisions. Proliferation of infected  
1045 cells was measured by dilution of CellTrace violet. Data for day 7 are found in Fig 2B.  
1046 **Fig S7. Schematic showing differences from the consensus B95-8 sequence in**  
1047 **the W repeat unit used to generate LPKO<sup>i</sup> and LPrev<sup>i</sup>.** The BamW repeat unit used  
1048 to construct the LPKO<sup>i</sup> and LPrev<sup>i</sup> IR1 repeat arrays was subcloned from the B95-8  
1049 BAC, but later found to contain several point changes relative to the previously  
1050 published sequence of B95-8. These changes exist in one repeat unit in B95-8 (Ba  
1051 abdullah et al; submitted for publication) and this repeat unit was unintentionally used to  
1052 produce LPKO<sup>i</sup> and LPrev<sup>i</sup>. This BamW repeat is indicated by the bracket below the  
1053 schematic, and is repeated 6 times in the repeat array. Non-consensus nucleotides in  
1054 BamW are indicated by a base followed by the consensus base in brackets, which is  
1055 green where the non-consensus base is found as a polymorphism in other virus strains.  
1056 The red base (T) creates a STOP codon in the subcloned repeat unit, but was replaced  
1057 by the consensus G as a result of the LPKO<sup>i</sup> and LPrev<sup>i</sup> cloning strategies (indicated by  
1058 **→G**). The nucleotides at the Cp and Y exon ends of the repeat is the same as the  
1059 parental BAC (the identity of G/T has not been determined). The intronic point mutation  
1060 (in purple) is the one deliberately introduced into the LPKO<sup>i</sup> and LPrev<sup>i</sup> viruses to  
1061 remove the BsmBI site (Fig 1A).

1062 **Fig S8. Schematic showing methods used to generate repeat arrays. A.** Schematic  
1063 representation of the Gibson assembly strategy used to generate LPKO<sup>w</sup> and WT<sup>w</sup>.  
1064 Grey boxes represent the BamW fragment and white boxes the flanks of the repeat as  
1065 described in Fig S1. Red and orange arrows indicate the sequences either side of the  
1066 BamHI restriction site within IR1. These arrows are the homology regions whose

1067 overlap drives the Gibson assembly of overlapping fragments as indicated in the lower  
1068 part of the figure, which shows the assembly of wild-type BamW fragments into the IR1  
1069 used to generate WT<sup>w</sup>. To generate LPKO<sup>w</sup>, the mutated W exons were cloned into  
1070 each of the five plasmids indicated, and the assembly performed in the same way. **B.**  
1071 Pulsed field gel analysis of the recombinant WT<sup>w</sup> and LPKO<sup>w</sup> viruses compared to the  
1072 parental EBV-BAC (WT-HB9). The PvuI digest shows the presence of the knockout-  
1073 specific mutation in EBNA-LP (yellow arrows), releasing multiple copies of the 3kb IR1  
1074 repeat unit (white arrow), as compared to the parental BAC (WT-HB9) and WT<sup>w</sup>. The  
1075 other digests show the overall integrity of the rest of the virus genome.

1076 **Fig S9. Proliferation of cell lines at various time points.** Flow cytometry plots from  
1077 live CD20-positive cells harvested either 4, 11 or 15 days after infection of adult B cells  
1078 stained with CellTrace violet prior to infection. Degree of dilution of the violet signal is  
1079 indicated on the x-axis, indicating number of cell divisions. Proliferation of infected cells  
1080 was measured by dilution of CellTrace violet. Data for day 8 are found in Fig 3A.

1081 **Fig S10. Time course for virus and host gene expression after EBNA-LP and**  
1082 **EBNA2 mutant virus infections.** As for Fig 5, graphs show levels of virus and host  
1083 transcripts as a time course after infection of resting B cells. Infections are grouped as  
1084 either 'wild-type' (comprising WT-HB9, WT<sup>w</sup>, Yrev, E2rev and LPrev<sup>i</sup>) or EBNA-LP  
1085 mutants (LPKO<sup>i</sup>, LPKO<sup>w</sup> and YKO), since these mutants showed consistent  
1086 phenotypes. These are compared with E2KO-infected and uninfected cells on day 2, as  
1087 indicated by the key. Transcript levels (measured by qPCR) are expressed relative to  
1088 the level for the WT-HB9 wild-type infection on day 2. Error bars show  $\pm 1$  standard  
1089 deviation of the gene level for each group. Note that Wp transcript level in E2KO

1090 infection was >10, so is left off the graph to allow the other data to be more clearly  
1091 visualized. EBNA3B and EBNA3C transcript levels (C, D) are therefore shown relative  
1092 to the EBNA2 transcript level, since they share promoters. Note that error bar for LMP2  
1093 levels (E) in wild-type infections on day 2 extends beyond 0, so is not plotted.

1094 **Fig S11. Binding of EBF1 to viral loci that do not bind EBNA2.** Time course of ChIP  
1095 analyses of EBF binding to its sites near the EBERs and oriP. These are respectively  
1096 assay E and assay O in Fig 6A.

1097

## 1098 **Acknowledgements**

1099 Thanks to Dr Teru Kanda for providing B95-8 BAC DNA containing intact FR, and  
1100 PCR protocols for comparative analyses of FR structure. Thanks to Martin Allday for  
1101 support and advice and to Paul Farrell for critical reading of the manuscript. Thanks to  
1102 Peter O'Hare and Thomas Hennig for assistance with microscopy. We thank the St.  
1103 Mary's NHLI FACS core facility and their staff, Malte Paulson and Yanping Guo, for  
1104 support and instrumentation. We thank Beverly Donaldson, Marielle Bouqueau, Thomas  
1105 Rice and Beate Kampmann for facilitating access to cord and maternal blood samples,  
1106 collected as part of the MatImms study, and the Imperial College Healthcare NHS  
1107 Tissue Bank for providing these samples.

1108

1109

## 1109 **REFERENCES**

- 1110 1. Plummer M, de Martel C, Vignat J, Ferlay J, Bray F, Franceschi S. Global burden  
1111 of cancers attributable to infections in 2012: a synthetic analysis. *Lancet Glob*  
1112 *Health*. 2016;4: e609–16. doi:10.1016/S2214-109X(16)30143-7
- 1113 2. Young LS, Yap L-F, Murray PG. Epstein-Barr virus: more than 50 years old and  
1114 still providing surprises. *Nat Rev Cancer*. 2016. doi:10.1038/nrc.2016.92

- 1115 3. Babcock GJ, Decker LL, Volk M, Thorley-Lawson DA. EBV persistence in  
1116 memory B cells in vivo. 1998;9: 395–404.
- 1117 4. Souza TA, Stollar BD, Sullivan JL, Luzuriaga K, Thorley-Lawson DA. Peripheral B  
1118 cells latently infected with Epstein-Barr virus display molecular hallmarks of  
1119 classical antigen-selected memory B cells. 2005;102: 18093–18098.  
1120 doi:10.1073/pnas.0509311102
- 1121 5. Price AM, Tourigny JP, Forte E, Salinas RE, Dave SS, Luftig MA. Analysis of  
1122 Epstein-Barr virus-regulated host gene expression changes through primary B-  
1123 cell outgrowth reveals delayed kinetics of latent membrane protein 1-mediated  
1124 NF- $\kappa$ B activation. J Virol. 2012;86: 11096–11106. doi:10.1128/JVI.01069-12
- 1125 6. Allday MJ, Crawford DH, Griffin BE. Epstein-Barr virus latent gene expression  
1126 during the initiation of B cell immortalization. 1989;70 ( Pt 7): 1755–1764.
- 1127 7. Sinclair AJ, Palmero I, Peters G, Farrell PJ. EBNA-2 and EBNA-LP cooperate to  
1128 cause G0 to G1 transition during immortalization of resting human B lymphocytes  
1129 by Epstein-Barr virus. EMBO J. 1994;13: 3321–3328. Available:  
1130 [http://www.ncbi.nlm.nih.gov/entrez/query.fcgi?db=pubmed&cmd=Retrieve&dopt=](http://www.ncbi.nlm.nih.gov/entrez/query.fcgi?db=pubmed&cmd=Retrieve&dopt=AbstractPlus&list_uids=8045261)  
1131 [AbstractPlus&list\\_uids=8045261](http://www.ncbi.nlm.nih.gov/entrez/query.fcgi?db=pubmed&cmd=Retrieve&dopt=AbstractPlus&list_uids=8045261)
- 1132 8. Price AM, Luftig MA. To Be or Not IIb: A Multi-Step Process for Epstein-Barr Virus  
1133 Latency Establishment and Consequences for B Cell Tumorigenesis. PLoS  
1134 Pathog. 2015;11: e1004656. doi:10.1371/journal.ppat.1004656
- 1135 9. Altmann M, Pich D, Ruiss R, Wang J, Sugden B, Hammerschmidt W.  
1136 Transcriptional activation by EBV nuclear antigen 1 is essential for the expression  
1137 of EBV's transforming genes. 2006;103: 14188–14193.  
1138 doi:10.1073/pnas.0605985103
- 1139 10. Sjöblom A, Jansson A, Yang W, Laín S, Nilsson T, Rymo L. PU box-binding  
1140 transcription factors and a POU domain protein cooperate in the Epstein-Barr  
1141 virus (EBV) nuclear antigen 2-induced transactivation of the EBV latent  
1142 membrane protein 1 promoter. J Gen Virol. 1995;76 ( Pt 11): 2679–2692.  
1143 doi:10.1099/0022-1317-76-11-2679
- 1144 11. Hsieh JJ, Nofziger DE, Weinmaster G, Hayward SD. Epstein-Barr virus  
1145 immortalization: Notch2 interacts with CBF1 and blocks differentiation. 1997;71:  
1146 1938–1945.
- 1147 12. Strobl LJ, Höfelmayr H, Stein C, Marschall G, Brielmeier M, Laux G, et al. Both  
1148 Epstein-Barr viral nuclear antigen 2 (EBNA2) and activated Notch1 transactivate  
1149 genes by interacting with the cellular protein RBP-J kappa. Immunobiology.  
1150 1997;198: 299–306.
- 1151 13. Jiang S, Willox B, Zhou H, Holthaus AM, Wang A, Shi TT, et al. Epstein-Barr  
1152 Virus Nuclear Antigen 3C binds to BATF/IRF4 or SPI1/IRF4 composite sites and

- 1153 recruits Sin3A to repress CDKN2A. 2013. doi:10.1073/pnas.1321704111
- 1154 14. Lu F, Chen H-S, Kossenkov AV, DeWislepeare K, Won K-J, Lieberman PM.  
1155 EBNA2 Drives Formation of New Chromosome Binding Sites and Target Genes  
1156 for B-Cell Master Regulatory Transcription Factors RBP-jk and EBF1. PLoS  
1157 Pathog. Public Library of Science; 2016;12: e1005339.  
1158 doi:10.1371/journal.ppat.1005339
- 1159 15. Skalska L, White RE, Parker GA, Turro E, Sinclair AJ, Paschos K, et al. Induction  
1160 of p16(INK4a) Is the Major Barrier to Proliferation when Epstein-Barr Virus (EBV)  
1161 Transforms Primary B Cells into Lymphoblastoid Cell Lines. PLoS Pathog.  
1162 2013;9: e1003187. doi:10.1371/journal.ppat.1003187
- 1163 16. Skalska L, White RE, Franz M, Ruhmann M, Allday MJ. Epigenetic repression of  
1164 p16(INK4A) by latent Epstein-Barr virus requires the interaction of EBNA3A and  
1165 EBNA3C with CtBP. PLoS Pathog. 2010;6: e1000951.  
1166 doi:10.1371/journal.ppat.1000951
- 1167 17. White RE, Groves IJ, Turro E, Yee J, Kremmer E, Allday MJ. Extensive co-  
1168 operation between the Epstein-Barr virus EBNA3 proteins in the manipulation of  
1169 host gene expression and epigenetic chromatin modification. PLoS ONE. 2010;5:  
1170 e13979. doi:10.1371/journal.pone.0013979
- 1171 18. McClellan MJ, Wood CD, Ojeniyi O, Cooper TJ, Kanhere A, Arvey A, et al.  
1172 Modulation of enhancer looping and differential gene targeting by epstein-barr  
1173 virus transcription factors directs cellular reprogramming. PLoS Pathog. 2013;9:  
1174 e1003636. doi:10.1371/journal.ppat.1003636
- 1175 19. Wang A, Welch R, Zhao B, Ta T, Keleş S, Johannsen E. Epstein-Barr Virus  
1176 Nuclear Antigen 3 (EBNA3) Proteins Regulate EBNA2 Binding to Distinct RBPJ  
1177 Genomic Sites. Jung JU, editor. 2015;90: 2906–2919. doi:10.1128/JVI.02737-15
- 1178 20. Székely L, Pokrovskaja K, Jiang WQ, de The H, Ringertz N, Klein G. The Epstein-  
1179 Barr virus-encoded nuclear antigen EBNA-5 accumulates in PML-containing  
1180 bodies. 1996;70: 2562–2568.
- 1181 21. Ling PD, Peng RS, Nakajima A, Yu JH, Tan J, Moses SM, et al. Mediation of  
1182 Epstein-Barr virus EBNA-LP transcriptional coactivation by Sp100. EMBO J.  
1183 2005;24: 3565–3575. doi:10.1038/sj.emboj.7600820
- 1184 22. Nitsche F, Bell A, Rickinson A. Epstein-Barr virus leader protein enhances EBNA-  
1185 2-mediated transactivation of latent membrane protein 1 expression: a role for the  
1186 W1W2 repeat domain. 1997;71: 6619–6628.
- 1187 23. Harada S, Kieff E. Epstein-Barr virus nuclear protein LP stimulates EBNA-2 acidic  
1188 domain-mediated transcriptional activation. 1997;71: 6611–6618.
- 1189 24. Peng R, Tan J, Ling PD. Conserved regions in the Epstein-Barr virus leader

- 1190 protein define distinct domains required for nuclear localization and transcriptional  
1191 cooperation with EBNA2. 2000;74: 9953–9963.
- 1192 25. McCann EM, Kelly GL, Rickinson AB, Bell AI. Genetic analysis of the Epstein-Barr  
1193 virus-coded leader protein EBNA-LP as a co-activator of EBNA2 function.  
1194 2001;82: 3067–3079.
- 1195 26. Peng R, Moses SC, Tan J, Kremmer E, Ling PD. The Epstein-Barr virus EBNA-  
1196 LP protein preferentially coactivates EBNA2-mediated stimulation of latent  
1197 membrane proteins expressed from the viral divergent promoter. 2005;79: 4492–  
1198 4505. doi:10.1128/JVI.79.7.4492-4505.2005
- 1199 27. Hammerschmidt W, Sugden B. Genetic analysis of immortalizing functions of  
1200 Epstein-Barr virus in human B lymphocytes. *Nature*. 1989;340: 393–397.  
1201 doi:10.1038/340393a0
- 1202 28. Mannick JB, Cohen JI, Birkenbach M, Marchini A, Kieff E. The Epstein-Barr virus  
1203 nuclear protein encoded by the leader of the EBNA RNAs is important in B-  
1204 lymphocyte transformation. 1991;65: 6826–6837.
- 1205 29. Tierney RJ, Kao K-Y, Nagra JK, Rickinson AB. Epstein-Barr virus BamHI W  
1206 repeat number limits EBNA2/EBNA-LP coexpression in newly infected B cells and  
1207 the efficiency of B-cell transformation: a rationale for the multiple W repeats in  
1208 wild-type virus strains. 2011;85: 12362–12375. doi:10.1128/JVI.06059-11
- 1209 30. Moss WN, Steitz JA. Genome-wide analyses of Epstein-Barr virus reveal  
1210 conserved RNA structures and a novel stable intronic sequence RNA. *BMC*  
1211 *Genomics*. 2013;14: 543. doi:10.1186/1471-2164-14-543
- 1212 31. Palser AL, Grayson NE, White RE, Corton C, Correia S, Ba Abdullah MM, et al.  
1213 Genome diversity of Epstein-Barr virus from multiple tumor types and normal  
1214 infection. 2015;89: 5222–5237. doi:10.1128/JVI.03614-14
- 1215 32. Kelly GL, Milner AE, Tierney RJ, Croom-Carter DSG, Altmann M,  
1216 Hammerschmidt W, et al. Epstein-Barr virus nuclear antigen 2 (EBNA2) gene  
1217 deletion is consistently linked with EBNA3A, -3B, and -3C expression in Burkitt's  
1218 lymphoma cells and with increased resistance to apoptosis. 2005;79: 10709–  
1219 10717. doi:10.1128/JVI.79.16.10709-10717.2005
- 1220 33. Anderton E, Yee J, Smith P, Crook T, White RE, Allday MJ. Two Epstein-Barr  
1221 virus (EBV) oncoproteins cooperate to repress expression of the proapoptotic  
1222 tumour-suppressor Bim: clues to the pathogenesis of Burkitt's lymphoma.  
1223 *Oncogene*. 2008;27: 421–433. doi:10.1038/sj.onc.1210668
- 1224 34. Cohen JI, Wang F, Mannick J, Kieff E. Epstein-Barr virus nuclear protein 2 is a  
1225 key determinant of lymphocyte transformation. *Proc Natl Acad Sci U S A*.  
1226 1989;86: 9558–9562.

- 1227 35. Nikitin PA, Yan CM, Forte E, Bocedi A, Tourigny JP, White RE, et al. An  
1228 ATM/Chk2-Mediated DNA Damage-Responsive Signaling Pathway Suppresses  
1229 Epstein-Barr Virus Transformation of Primary Human B Cells. *Cell Host Microbe*.  
1230 Elsevier; 2010;8: 510–522. doi:10.1016/j.chom.2010.11.004
- 1231 36. Gibson DG, Young L, Chuang R-Y, Venter JC, Hutchison CA, Smith HO.  
1232 Enzymatic assembly of DNA molecules up to several hundred kilobases. *Nat*  
1233 *Methods*. 2009;6: 343–345. doi:10.1038/nmeth.1318
- 1234 37. Heath E, Begue-Pastor N, Chaganti S, Croom-Carter D, Shannon-Lowe C, Kube  
1235 D, et al. Epstein-Barr virus infection of naïve B cells in vitro frequently selects  
1236 clones with mutated immunoglobulin genotypes: implications for virus biology.  
1237 *PLoS Pathog*. 2012;8: e1002697. doi:10.1371/journal.ppat.1002697
- 1238 38. Portal D, Zhao B, Calderwood MA, Sommermann T, Johannsen E, Kieff E. EBV  
1239 nuclear antigen EBNA1P dismisses transcription repressors NCoR and RBPJ  
1240 from enhancers and EBNA2 increases NCoR-deficient RBPJ DNA binding.  
1241 *2011;108: 7808–7813*. doi:10.1073/pnas.1104991108
- 1242 39. Portal D, Zhou H, Zhao B, Kharchenko PV, Lowry E, Wong L, et al. Epstein-Barr  
1243 virus nuclear antigen leader protein localizes to promoters and enhancers with  
1244 cell transcription factors and EBNA2. *2013;110: 18537–18542*.  
1245 doi:10.1073/pnas.1317608110
- 1246 40. Lee JH, Skowron PM, Rutkowska SM, Hong SS, Kim SC. Sequential amplification  
1247 of cloned DNA as tandem multimers using class-IIIS restriction enzymes. *Genet*  
1248 *Anal*. 1996;13: 139–145. doi:10.1016/S1050-3862(96)00164-7
- 1249 41. Grundhoff A, Ganem D. The latency-associated nuclear antigen of Kaposi's  
1250 sarcoma-associated herpesvirus permits replication of terminal repeat-containing  
1251 plasmids. *2003;77: 2779–2783*.
- 1252 42. White RE, Carline L, Allday MJ. Mutagenesis of the herpesvirus saimiri terminal  
1253 repeat region reveals important elements for virus production. *2007;81: 6765–*  
1254 *6770*. doi:10.1128/JVI.02579-06
- 1255 43. Yoo LI, Woloszynek J, Templeton S, Speck SH. Deletion of Epstein-Barr Virus  
1256 Regulatory Sequences Upstream of the EBNA Gene Promoter Wp1 Is  
1257 Unfavorable for B-Cell Immortalization. *J Virol*. 2002;76: 11763–11769.  
1258 doi:10.1128/jvi.76.22.11763-11769.2002
- 1259 44. Nicoll MP, Proença JT, Efsthathiou S. The molecular basis of herpes simplex virus  
1260 latency. *FEMS Microbiol Rev*. 2012;36: 684–705. doi:10.1111/j.1574-  
1261 *6976.2011.00320.x*
- 1262 45. Gardner EJ, Nizami ZF, Talbot CC, Gall JG. Stable intronic sequence RNA  
1263 (sisRNA), a new class of noncoding RNA from the oocyte nucleus of *Xenopus*  
1264 *tropicalis*. *Genes Dev*. Cold Spring Harbor Lab; 2012;26: 2550–2559.

- 1265 doi:10.1101/gad.202184.112
- 1266 46. Yin Q-F, Yang L, Zhang Y, Xiang J-F, Wu Y-W, Carmichael GG, et al. Long  
1267 noncoding RNAs with snoRNA ends. *Mol Cell*. 2012;48: 219–230.  
1268 doi:10.1016/j.molcel.2012.07.033
- 1269 47. Pek JW, Osman I, Tay ML-I, Zheng RT. Stable intronic sequence RNAs have  
1270 possible regulatory roles in *Drosophila melanogaster*. *J Cell Biol*. 2015;211: 243–  
1271 251. doi:10.1083/jcb.201507065
- 1272 48. Osman I, Tay ML-I, Pek JW. Stable intronic sequence RNAs (sisRNAs): a new  
1273 layer of gene regulation. *Cell Mol Life Sci*. 2016;73: 3507–3519.  
1274 doi:10.1007/s00018-016-2256-4
- 1275 49. Hansen TB, Venø MT, Jensen TI, Schaefer A, Damgaard CK, Kjems J.  
1276 Argonaute-associated short introns are a novel class of gene regulators. *Nat*  
1277 *Commun*. 2016;7: 11538. doi:10.1038/ncomms11538
- 1278 50. Cao S, Strong MJ, Wang X, Moss WN, Concha M, Lin Z, et al. High-throughput  
1279 RNA sequencing-based virome analysis of 50 lymphoma cell lines from the  
1280 cancer cell line encyclopedia project. 2015;89: 713–729. doi:10.1128/JVI.02570-  
1281 14
- 1282 51. Kalla M, Schmeinck A, Bergbauer M, Pich D, Hammerschmidt W. AP-1 homolog  
1283 BZLF1 of Epstein-Barr virus has two essential functions dependent on the  
1284 epigenetic state of the viral genome. *Proceedings of the National Academy of*  
1285 *Sciences*. 2010;107: 850–855. doi:10.1073/pnas.0911948107
- 1286 52. Klein U, Tu Y, Stolovitzky GA, Keller JL, Haddad J, Miljkovic V, et al.  
1287 Transcriptional analysis of the B cell germinal center reaction. 2003;100: 2639–  
1288 2644. doi:10.1073/pnas.0437996100
- 1289 53. Crawford DH, Macsween KF, Higgins CD, Thomas R, McAulay K, Williams H, et  
1290 al. A cohort study among university students: identification of risk factors for  
1291 Epstein-Barr virus seroconversion and infectious mononucleosis. *Clin Infect Dis*.  
1292 2006;43: 276–282. doi:10.1086/505400
- 1293 54. Tangye SG, Avery DT, Deenick EK, Hodgkin PD. Intrinsic differences in the  
1294 proliferation of naive and memory human B cells as a mechanism for enhanced  
1295 secondary immune responses. *J Immunol*. 2003;170: 686–694. Available:  
1296 [http://eutils.ncbi.nlm.nih.gov/entrez/eutils/elink.fcgi?dbfrom=pubmed&id=1251792](http://eutils.ncbi.nlm.nih.gov/entrez/eutils/elink.fcgi?dbfrom=pubmed&id=12517929&retmode=ref&cmd=prlinks)  
1297 [9&retmode=ref&cmd=prlinks](http://eutils.ncbi.nlm.nih.gov/entrez/eutils/elink.fcgi?dbfrom=pubmed&id=12517929&retmode=ref&cmd=prlinks)
- 1298 55. Tangye SG, Avery DT, Hodgkin PD. A division-linked mechanism for the rapid  
1299 generation of Ig-secreting cells from human memory B cells. *J Immunol*.  
1300 2003;170: 261–269.
- 1301 56. Ha YJ, Mun Y-C, Seong C-M, Lee JR. Characterization of phenotypically distinct



- 1302 B-cell subsets and receptor-stimulated mitogen-activated protein kinase activation  
1303 in human cord blood B cells. *J Leukoc Biol.* 2008;84: 1557–1564.  
1304 doi:10.1189/jlb.0706457
- 1305 57. Moens L, Kane A, Tangye SG. Naive and memory B cells exhibit distinct  
1306 biochemical responses following BCR engagement. *Immunol Cell Biol.* Nature  
1307 Publishing Group; 2016;94: 774–786. doi:10.1038/icb.2016.41
- 1308 58. Thorley-Lawson DA. Epstein-Barr virus: exploiting the immune system. *Nat Rev*  
1309 *Immunol.* 2001;1: 75–82. doi:10.1038/35095584
- 1310 59. Amu S, Brisslert M. Phenotype and function of CD25-expressing B lymphocytes  
1311 isolated from human umbilical cord blood. *Clin Dev Immunol.* 2011;2011: 481948.  
1312 doi:10.1155/2011/481948
- 1313 60. Bovia F, Nabili Tehrani AC, Werner Favre C, Barnet M, Kindler V, Zubler RH.  
1314 Quiescent memory B cells in human peripheral blood co-express bcl-2 and bcl-xL  
1315 anti-apoptotic proteins at high levels. *Eur J Immunol.* WILEY-VCH Verlag GmbH;  
1316 1998;28: 4418–4423. doi:10.1002/(SICI)1521-4141(199812)28:12<4418::AID-  
1317 IMMU4418>3.0.CO;2-7
- 1318 61. Peperzak V, Slinger E, Burg Ter J, Eldering E. Functional disparities among BCL-  
1319 2 members in tonsillar and leukemic B-cell subsets assessed by BH3-mimetic  
1320 profiling. *Cell Death Differ.* 2017;24: 111–119. doi:10.1038/cdd.2016.105
- 1321 62. Kashuba E, Yurchenko M, Yenamandra SP, Snopok B, Szekely L, Bercovich B, et  
1322 al. Epstein-Barr virus-encoded EBNA-5 forms trimolecular protein complexes with  
1323 MDM2 and p53 and inhibits the transactivating function of p53. *Int J Cancer.*  
1324 2011;128: 817–825. doi:10.1002/ijc.25414
- 1325 63. McFadden K, Hafez AY, Kishton R, Messinger JE, Nikitin PA, Rathmell JC, et al.  
1326 Metabolic stress is a barrier to Epstein-Barr virus-mediated B-cell immortalization.  
1327 *Proceedings of the National Academy of Sciences.* 2016;113: E782–90.  
1328 doi:10.1073/pnas.1517141113
- 1329 64. Darekar S, Georgiou K, Yurchenko M, Yenamandra SP, Chachami G, Simos G,  
1330 et al. Epstein-barr virus immortalization of human B-cells leads to stabilization of  
1331 hypoxia-induced factor 1 alpha, congruent with the warburg effect. *PLoS ONE.*  
1332 2012;7: e42072. doi:10.1371/journal.pone.0042072
- 1333 65. Portal D, Rosendorff A, Kieff E. Epstein-Barr nuclear antigen leader protein  
1334 coactivates transcription through interaction with histone deacetylase 4. 2006;103:  
1335 19278–19283. doi:10.1073/pnas.0609320103
- 1336 66. Peng C-W, Xue Y, Zhao B, Johannsen E, Kieff E, Harada S. Direct interactions  
1337 between Epstein-Barr virus leader protein LP and the EBNA2 acidic domain  
1338 underlie coordinate transcriptional regulation. 2004;101: 1033–1038.  
1339 doi:10.1073/pnas.0307808100

- 1340 67. Palermo RD, Webb HM, West MJ. RNA polymerase II stalling promotes  
1341 nucleosome occlusion and pTEFb recruitment to drive immortalization by Epstein-  
1342 Barr virus. *PLoS Pathog.* 2011;7: e1002334. doi:10.1371/journal.ppat.1002334
- 1343 68. Tempera I, Klichinsky M, Lieberman PM. EBV latency types adopt alternative  
1344 chromatin conformations. Jung JU, editor. *PLoS Pathog.* 2011;7: e1002180.  
1345 doi:10.1371/journal.ppat.1002180
- 1346 69. Chen H-S, Martin KA, Lu F, Lupey LN, Mueller JM, Lieberman PM, et al.  
1347 Epigenetic deregulation of the LMP1/LMP2 locus of Epstein-Barr virus by  
1348 mutation of a single CTCF-cohesin binding site. *J Virol.* 2014;88: 1703–1713.  
1349 doi:10.1128/JVI.02209-13
- 1350 70. Schneider WM, Wu D-T, Amin V, Aiyer S, Roth MJ. MuLV IN mutants responsive  
1351 to HDAC inhibitors enhance transcription from unintegrated retroviral DNA.  
1352 *Virology.* 2012;426: 188–196. doi:10.1016/j.virol.2012.01.034
- 1353 71. Pelascini LPL, Janssen JM, Gonçalves MAFV. Histone deacetylase inhibition  
1354 activates transgene expression from integration-defective lentiviral vectors in  
1355 dividing and non-dividing cells. *Hum Gene Ther.* 2013;24: 78–96.  
1356 doi:10.1089/hum.2012.069
- 1357 72. Tsai K, Chan L, Gibeault R, Conn K, Dheekollu J, Domsic J, et al. Viral  
1358 reprogramming of the Daxx histone H3.3 chaperone during early Epstein-Barr  
1359 virus infection. *J Virol.* 2014;88: 14350–14363. doi:10.1128/JVI.01895-14
- 1360 73. Lu Y, Orr A, Everett RD. Stimulation of the Replication of ICP0-Null Mutant  
1361 Herpes Simplex Virus 1 and pp71-Deficient Human Cytomegalovirus by Epstein-  
1362 Barr Virus Tegument Protein BNRF1. *J Virol.* 2016;90: 9664–9673.  
1363 doi:10.1128/JVI.01224-16
- 1364 74. Lee N, Yario TA, Gao JS, Steitz JA. EBV noncoding RNA EBER2 interacts with  
1365 host RNA-binding proteins to regulate viral gene expression. *National Acad  
1366 Sciences;* 2016;113: 3221–3226. doi:10.1073/pnas.1601773113
- 1367 75. Forsman A, Rüetschi U, Ekholm J, Rymo L. Identification of intracellular proteins  
1368 associated with the EBV-encoded nuclear antigen 5 using an efficient TAP  
1369 procedure and FT-ICR mass spectrometry. *J Proteome Res.* 2008;7: 2309–2319.  
1370 doi:10.1021/pr700769e
- 1371 76. Mellacheruvu D, Wright Z, Couzens AL, Lambert J-P, St-Denis NA, Li T, et al. The  
1372 CRAPome: a contaminant repository for affinity purification-mass spectrometry  
1373 data. *Nat Methods.* 2013;10: 730–736. doi:10.1038/nmeth.2557
- 1374 77. Pokrovskaja K, Mattsson K, Kashuba E, Klein G, Székely L. Proteasome inhibitor  
1375 induces nucleolar translocation of Epstein-Barr virus-encoded EBNA-5. 2001;82:  
1376 345–358.

- 1377 78. Stuber G, Flaberg E, Petranyi G, Otvös R, Rökaeus N, Kashuba E, et al. PRIMA-  
1378 1MET induces nucleolar translocation of Epstein-Barr virus-encoded EBNA-5  
1379 protein. *Molecular Cancer*. 2009;8: 23. doi:10.1186/1476-4598-8-23
- 1380 79. White RE, Calderwood MA, Whitehouse A. Generation and precise modification  
1381 of a herpesvirus saimiri bacterial artificial chromosome demonstrates that the  
1382 terminal repeats are required for both virus production and episomal persistence.  
1383 2003;84: 3393–3403.
- 1384 80. Kanda T, Shibata S, Saito S, Murata T, Isomura H, Yoshiyama H, et al.  
1385 Unexpected Instability of Family of Repeats (FR), the Critical cis-Acting Sequence  
1386 Required for EBV Latent Infection, in EBV-BAC Systems. *PLoS ONE. Public*  
1387 *Library of Science*; 2011;6: e27758. doi:10.1371/journal.pone.0027758
- 1388 81. Fruscalzo A, Marsili G, Busiello V, Bertolini L, Frezza D. DNA sequence  
1389 heterogeneity within the Epstein-Barr virus family of repeats in the latent origin of  
1390 replication. *Gene*. 2001;265: 165–173.
- 1391 82. White RE, Wade-Martins R, Hart SL, Frampton J, Huey B, Desai-Mehta A, et al.  
1392 Functional delivery of large genomic DNA to human cells with a peptide-lipid  
1393 vector. *J Gene Med*. 2003;5: 883–892. doi:10.1002/jgm.420
- 1394 83. Wade-Martins R, Frampton J, James MR. Long-term stability of large insert  
1395 genomic DNA episomal shuttle vectors in human cells. *Nucleic Acids Res*.  
1396 1999;27: 1674–1682.
- 1397 84. Sen N, Kumari R, Singh MI, Das S. HDAC5, a Key Component in Temporal  
1398 Regulation of p53-Mediated Transactivation in Response to Genotoxic Stress.  
1399 *Mol Cell*. 2013. doi:10.1016/j.molcel.2013.09.003
- 1400 85. Paschos K, Parker GA, Watanatanasup E, White RE, Allday MJ. BIM promoter  
1401 directly targeted by EBNA3C in polycomb-mediated repression by EBV. *Nucleic*  
1402 *Acids Res*. 2012;40: 7233–7246. doi:10.1093/nar/gks391
- 1403 86. Lobry C, Ntziachristos P, Ndiaye-Lobry D, Oh P, Cimmino L, Zhu N, et al. Notch  
1404 pathway activation targets AML-initiating cell homeostasis and differentiation. *J*  
1405 *Exp Med*. 2013;210: 301–319. doi:10.1084/jem.20121484

1406

1407

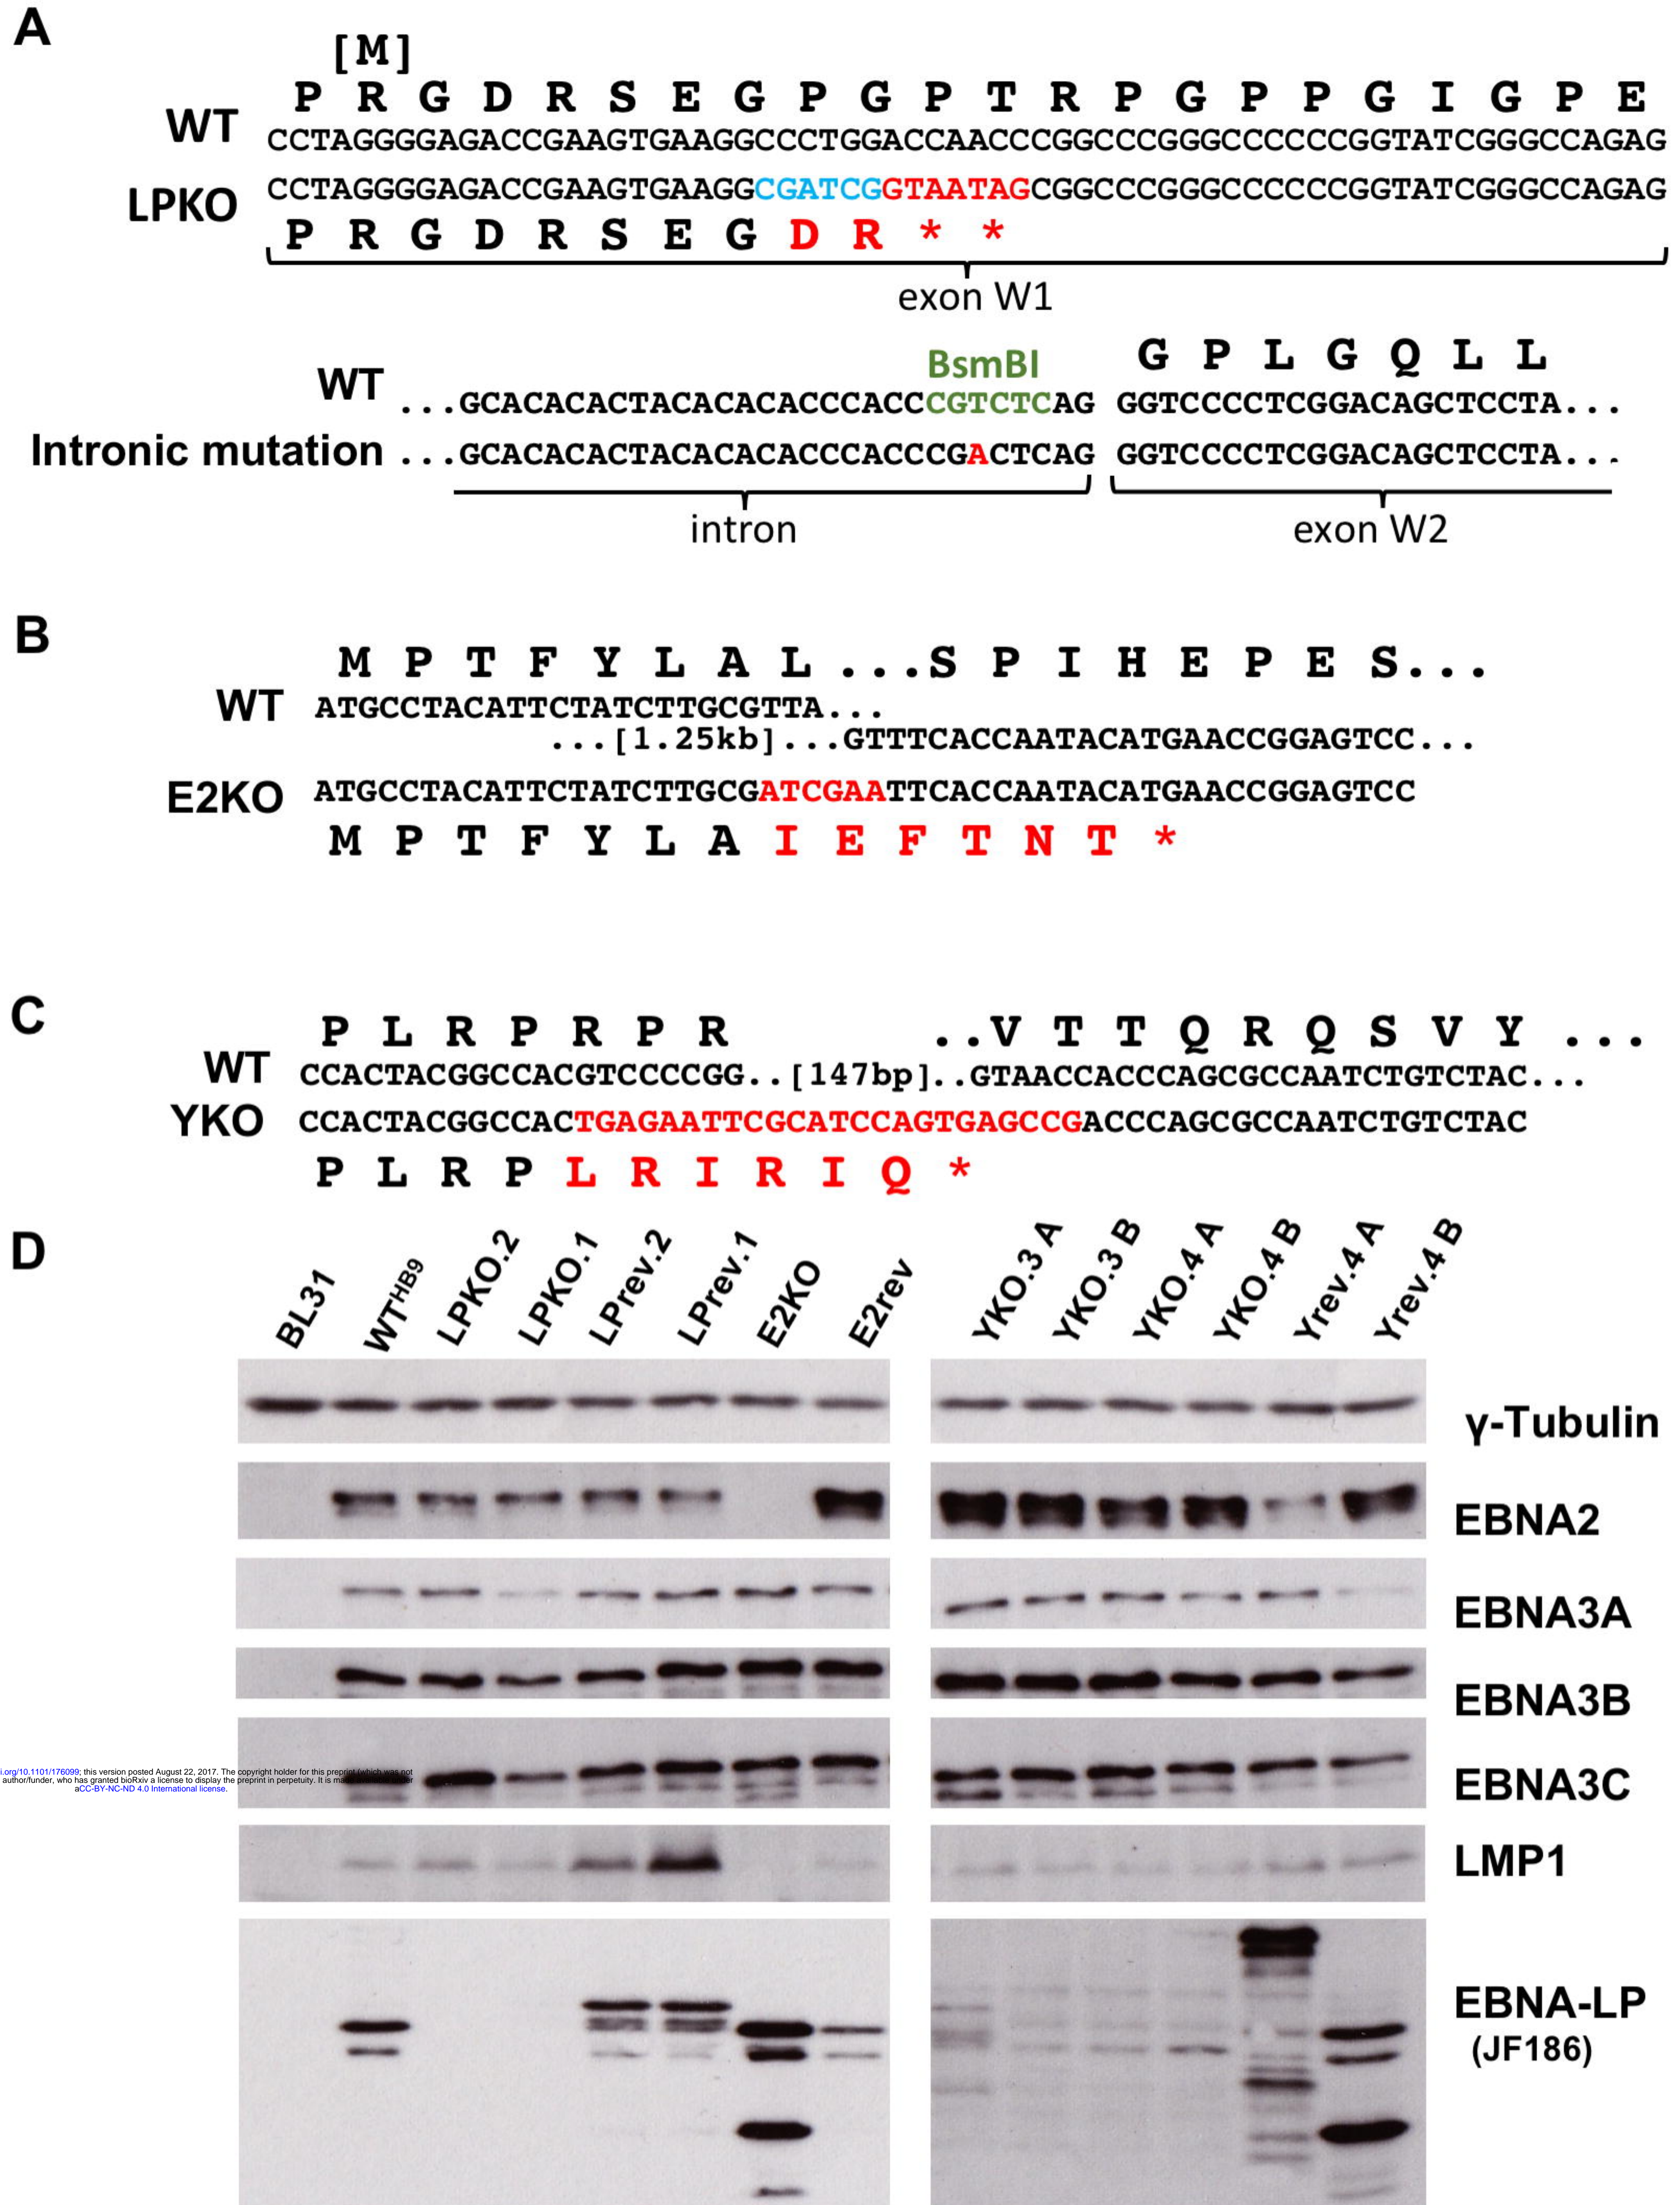

bioRxiv preprint doi: <https://doi.org/10.1101/176099>; this version posted August 22, 2017. The copyright holder for this preprint (which was not certified by peer review) is the author/funder, who has granted bioRxiv a license to display the preprint in perpetuity. It is made available under aCC-BY-NC-ND 4.0 International license.

**Fig 1. Construction and validation of EBNA-LP knockouts and their revertants.** Sequence changes introduced in the production of: **A.** EBNA-LP knockout, LPKO<sup>i</sup>, and the intronic mutation also shared by LP<sup>rev</sup><sup>i</sup>; **B.** EBNA2 knockout, E2KO; and **C.** the EBNA-LP truncation mutant YKO. Protein translations are shown above the nucleotide sequence, with the initiating methionine of EBNA-LP created by alternative splicing is shown in square brackets. The nucleotide changes (red) and the introduced PvuI restriction enzyme site (blue) are indicated. The BsmBI restriction site (green) deleted by a single T to A nucleotide change in LPKO<sup>i</sup> and LP<sup>rev</sup><sup>i</sup> is indicated. **D.** Western blotting of EBV protein levels in BL31 cells stably infected with the various recombinant viruses. A and B suffixes indicate independent BL31 cell lines produced from the same virus.

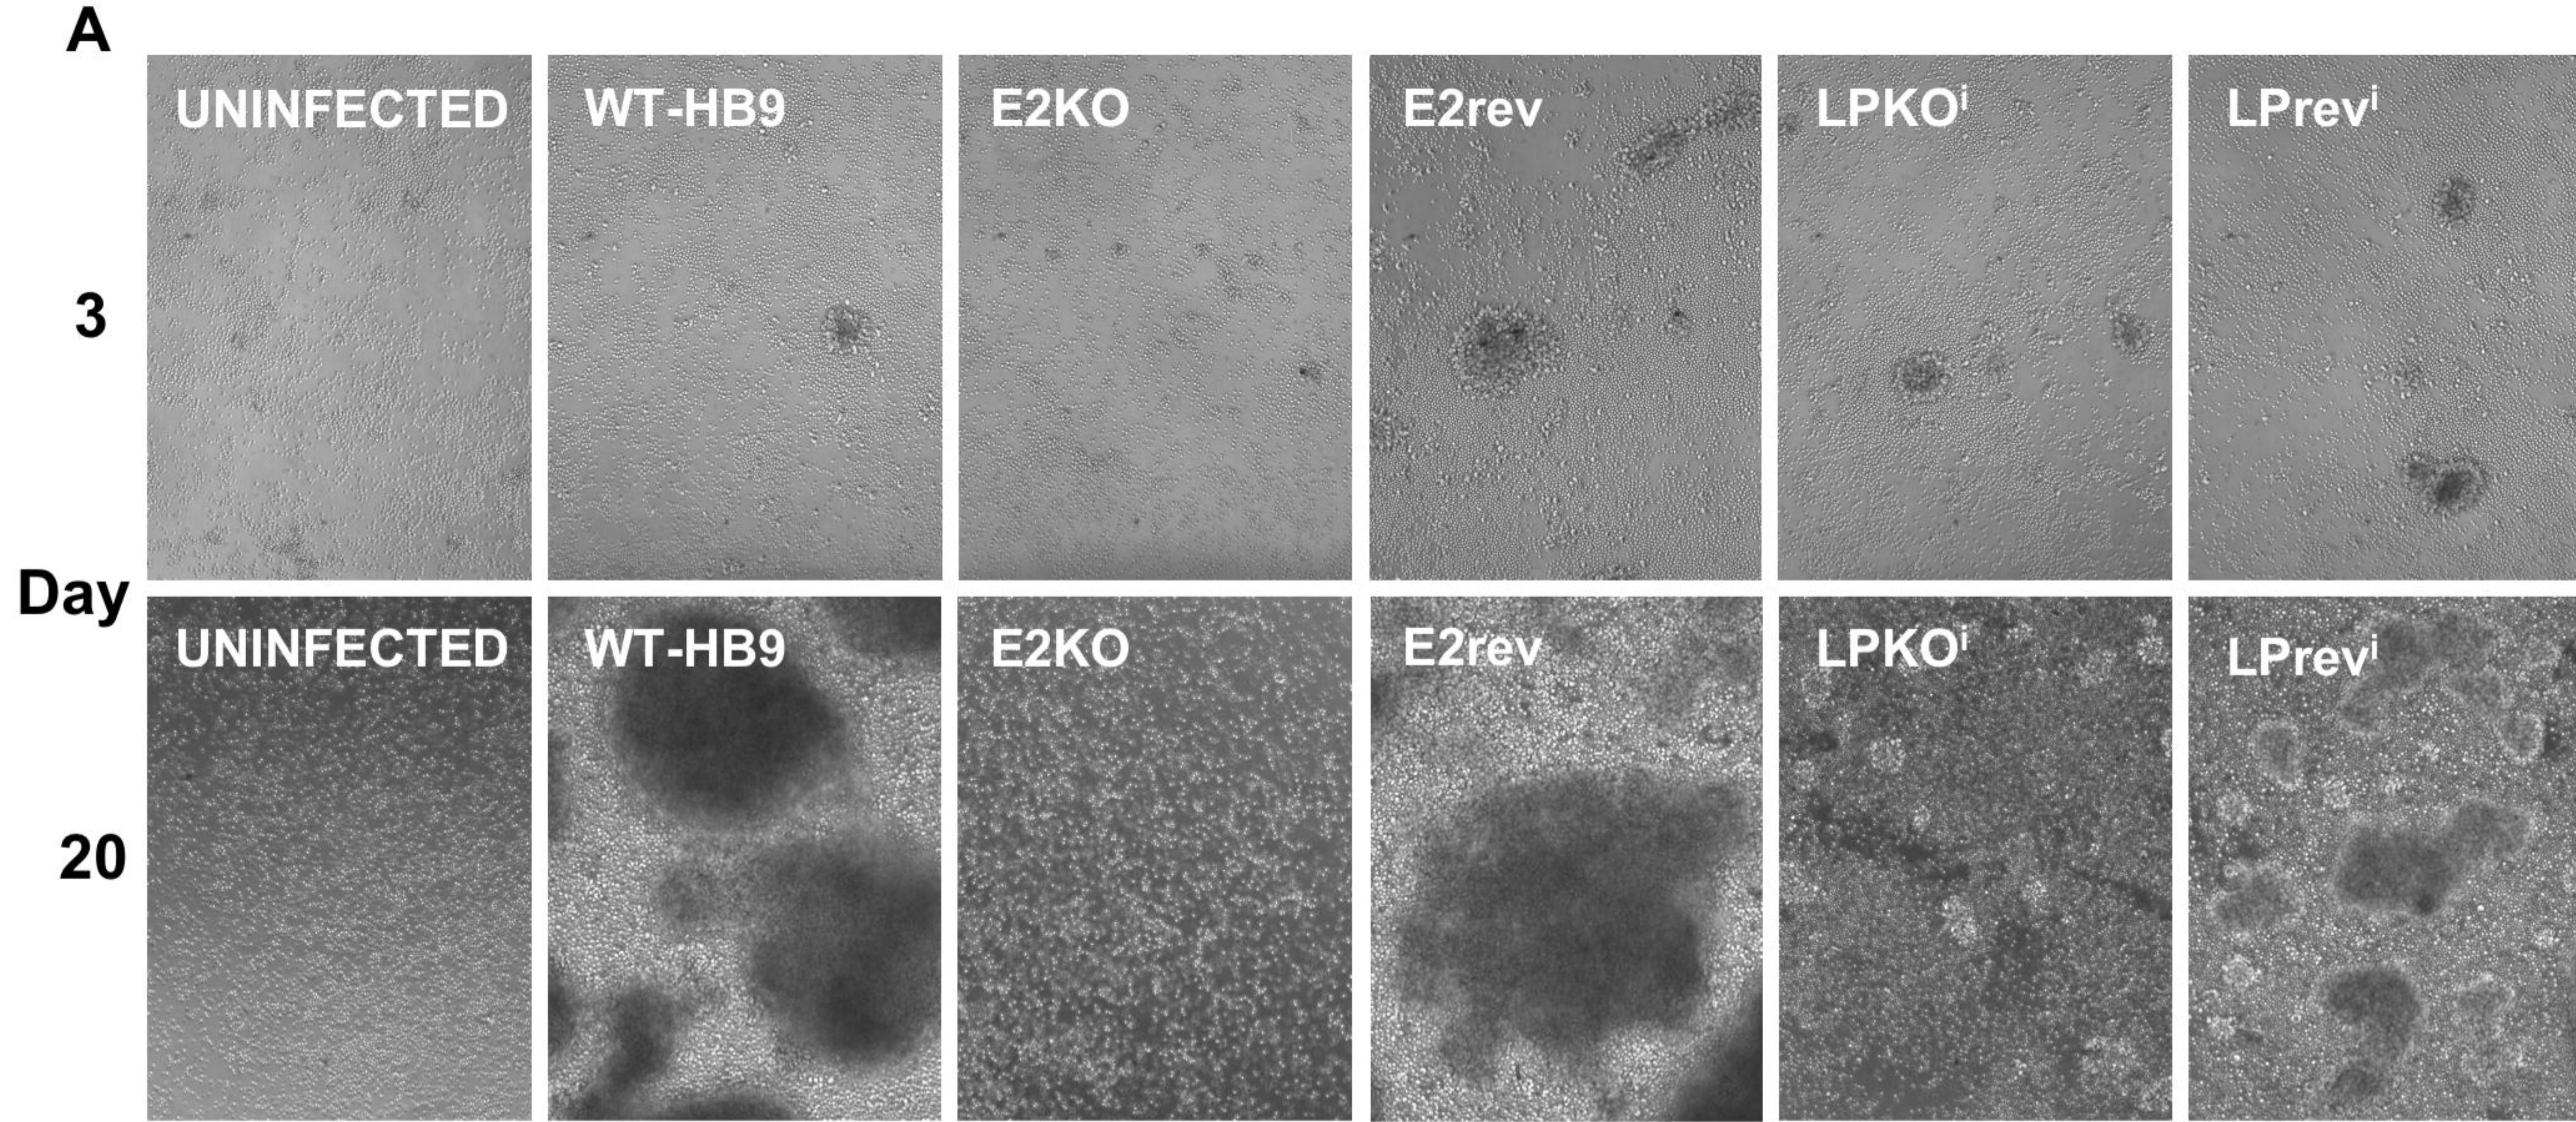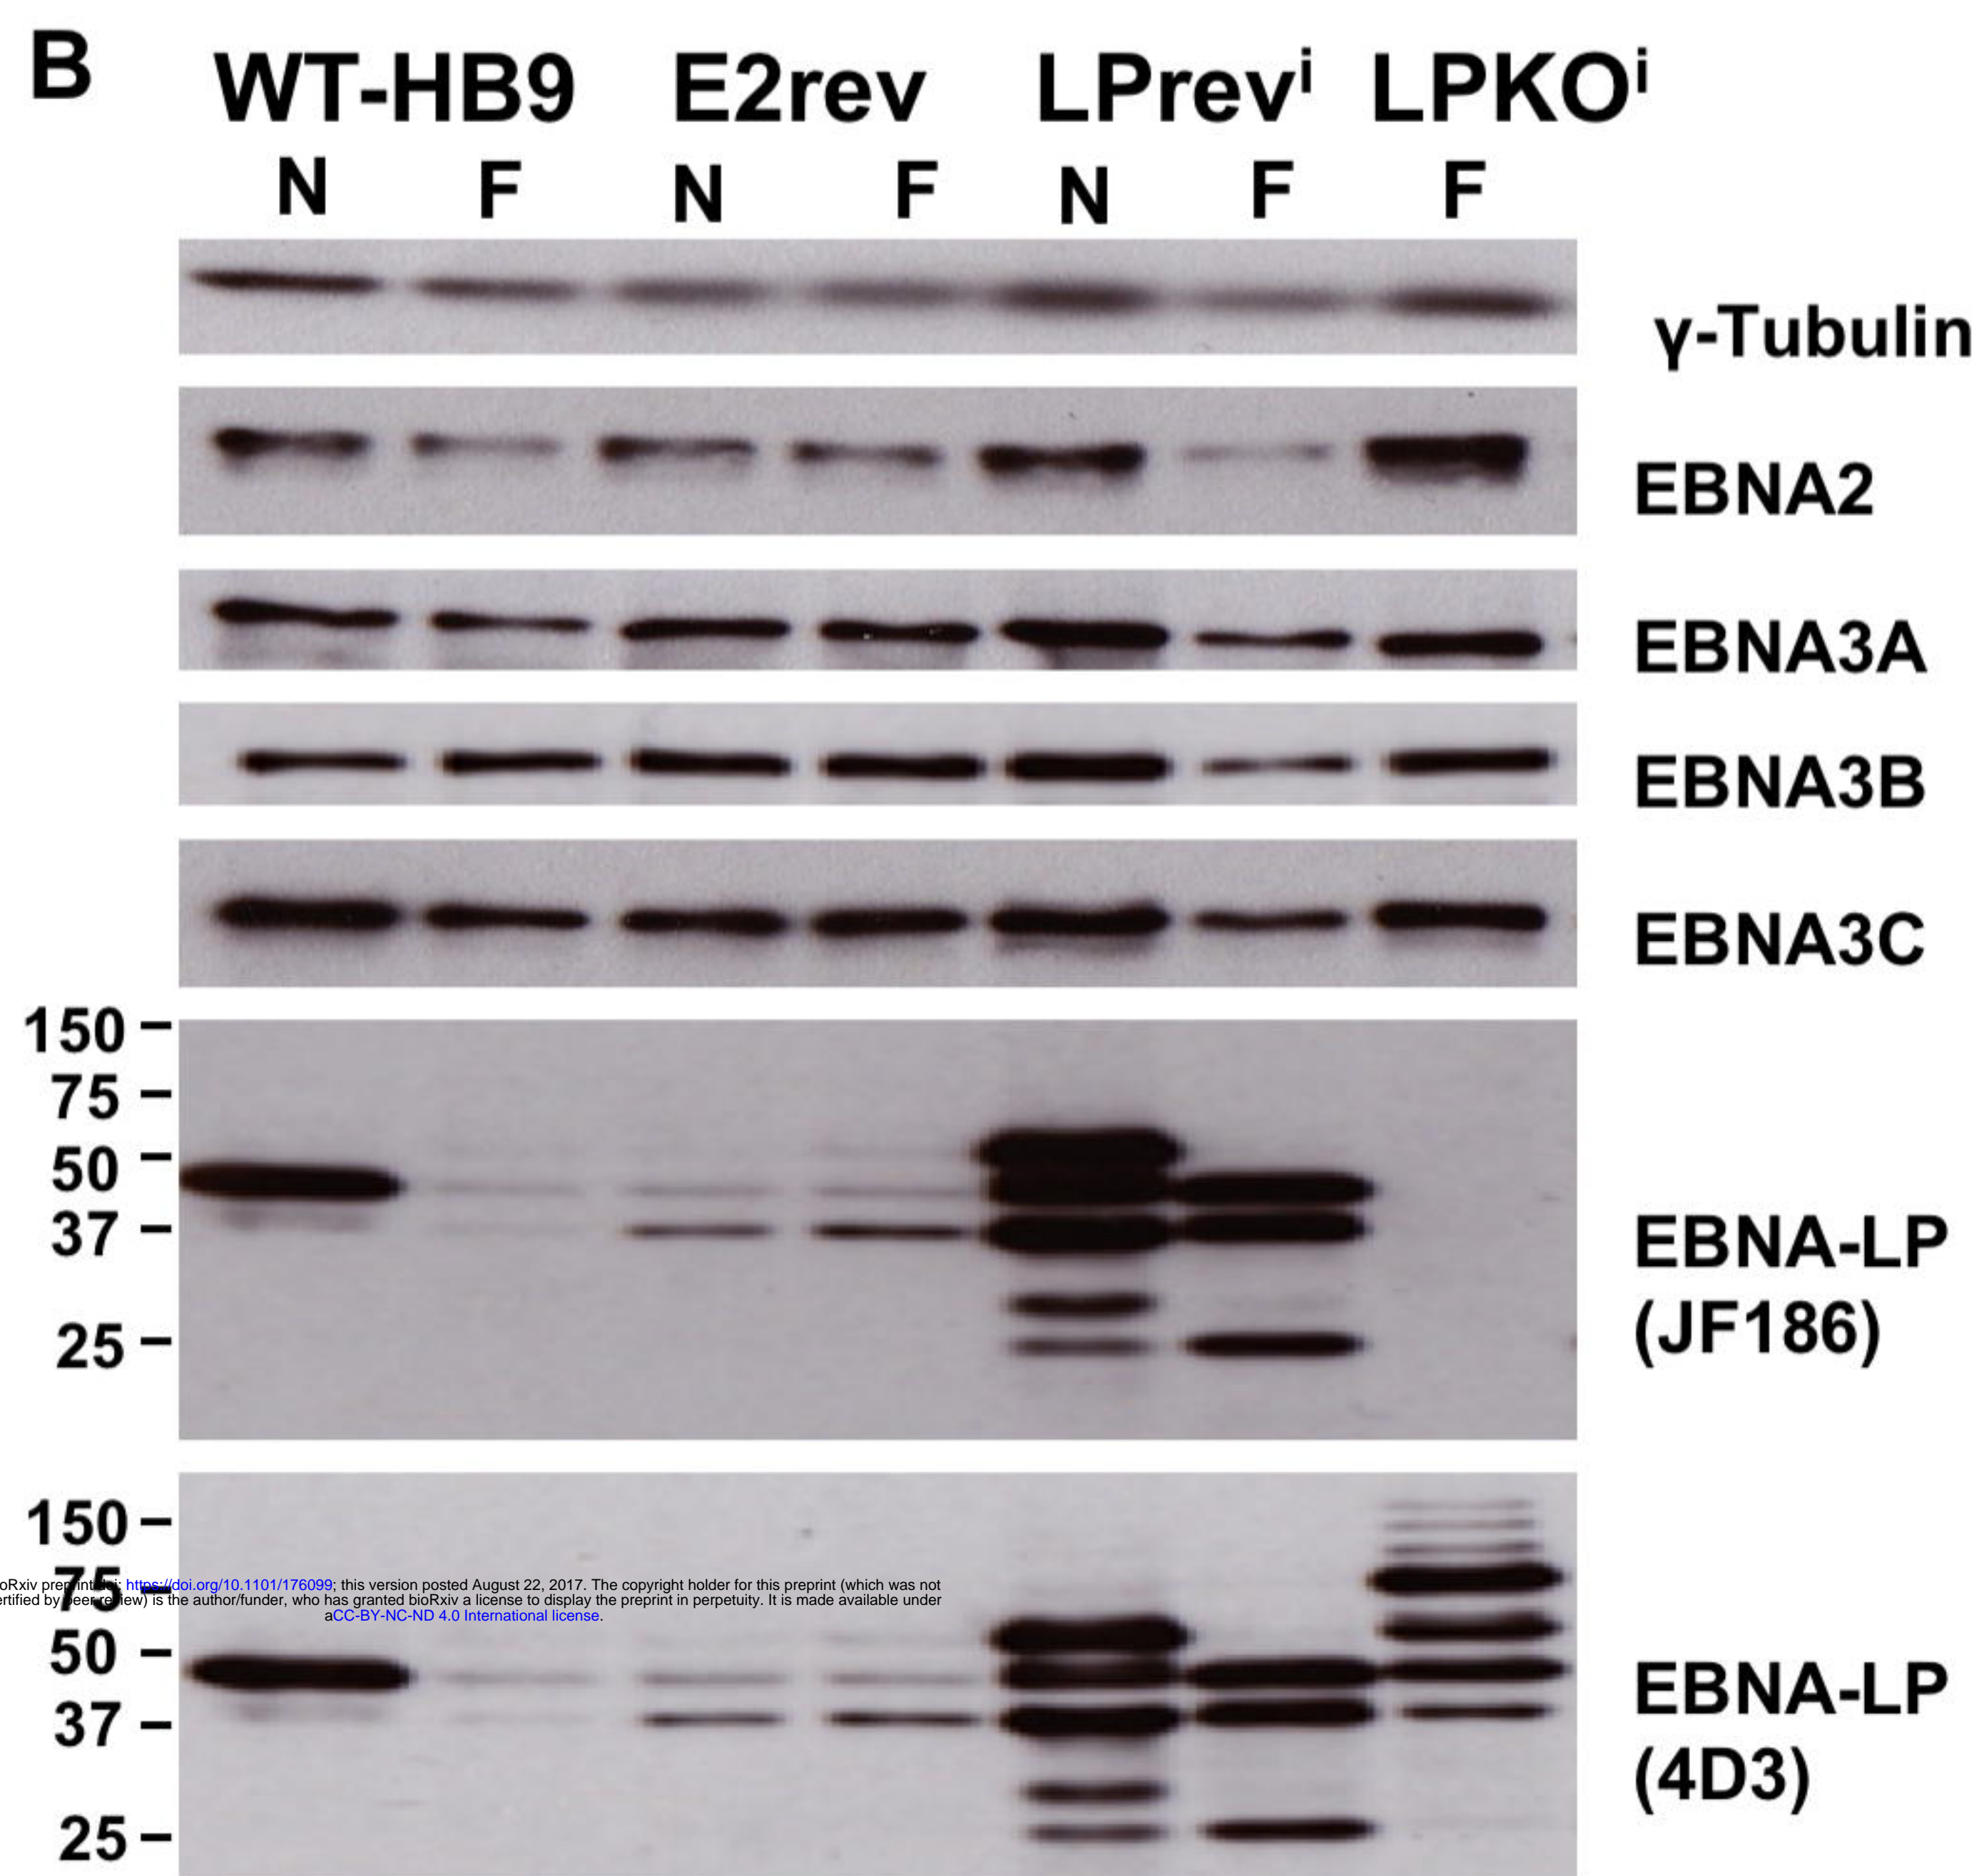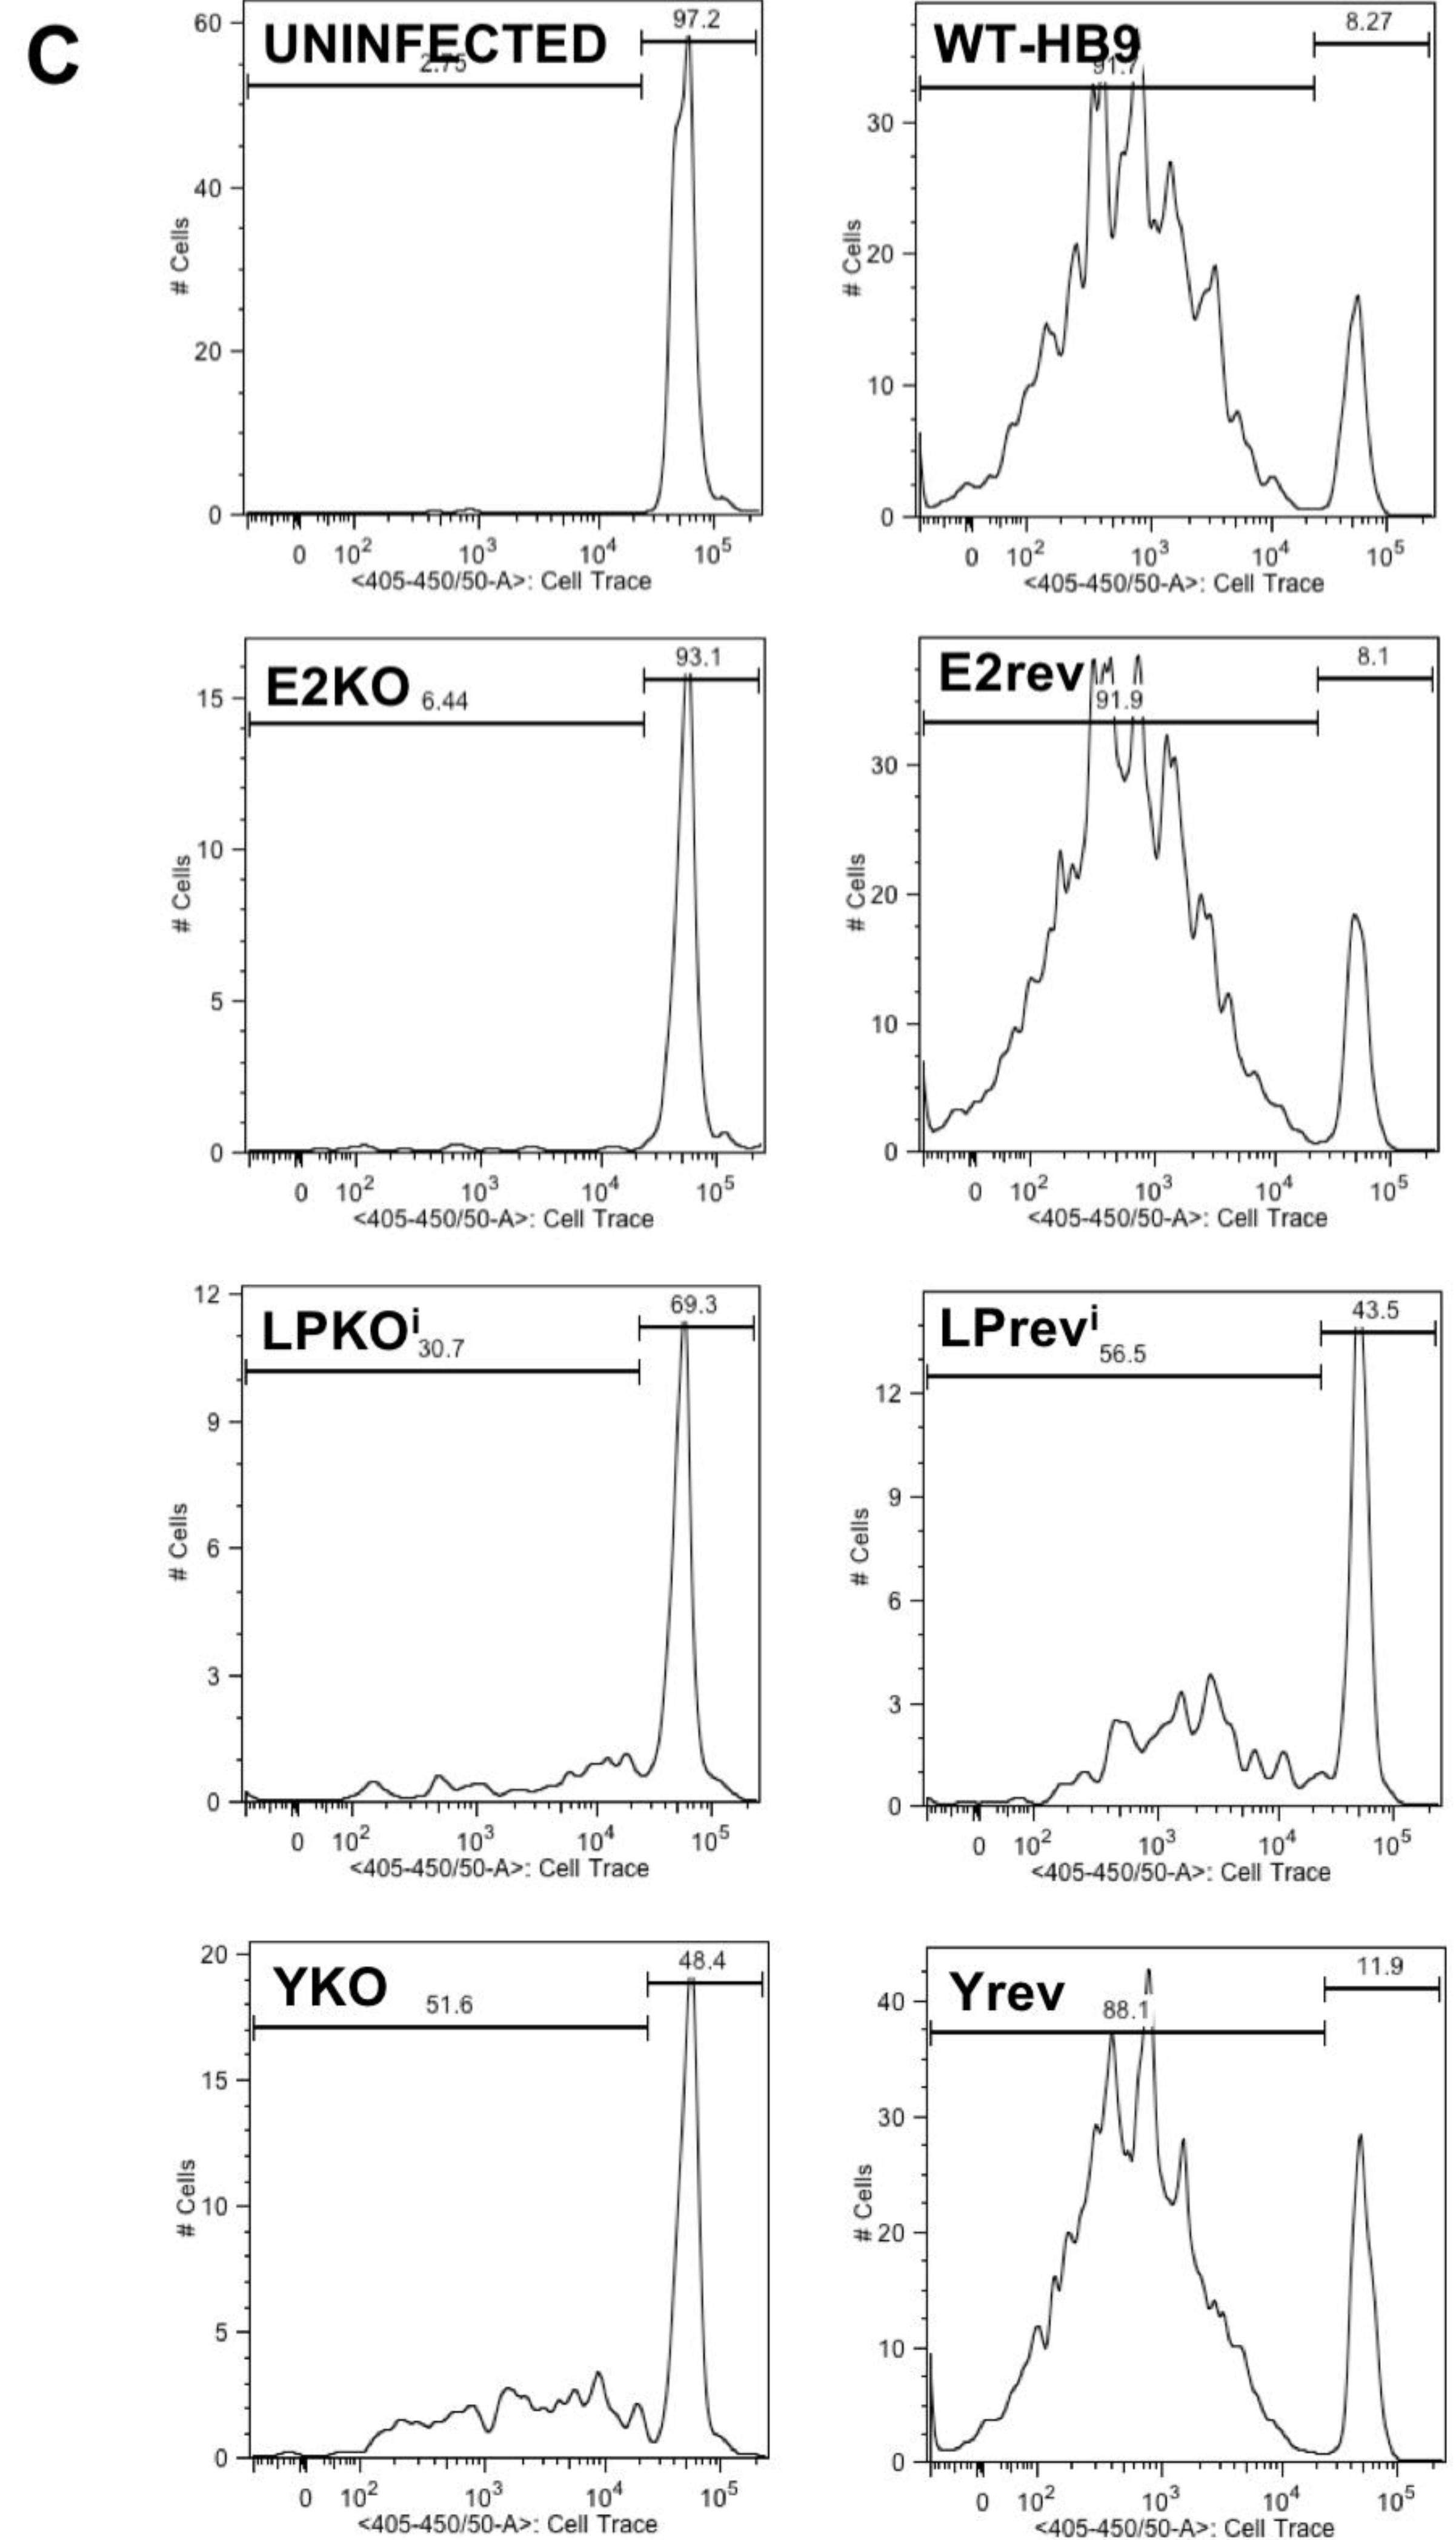

**Fig 2. Both LPKO<sup>i</sup> and LPrevi<sup>i</sup> are transformation-defective.** **A.** CD19-selected adult B cells were infected with viruses as indicated. Cell activation and transformation as seen under 10x magnification at the time points indicated (see Fig S5 for more time points). **B.** Western blots of proteins from LCLs grown out from recombinant EBV infections. The virus used for the outgrowth is indicated. Initial phase of the outgrowth of cells was either performed on irradiated MRC5 feeder cells (F) or without feeder cells (N). The epitope in EBNA-LP recognised by the JF186 antibody exists in B95-8 but is missing from most virus strains. Antibody 4D3 recognises all known EBNA-LP variants. **C.** Flow cytometry plots from live CD20-positive cells 7 days after infection of adult B cells stained with CellTrace violet prior to infection. Degree of dilution of the violet signal is indicated on the x-axis, indicating number of cell divisions.

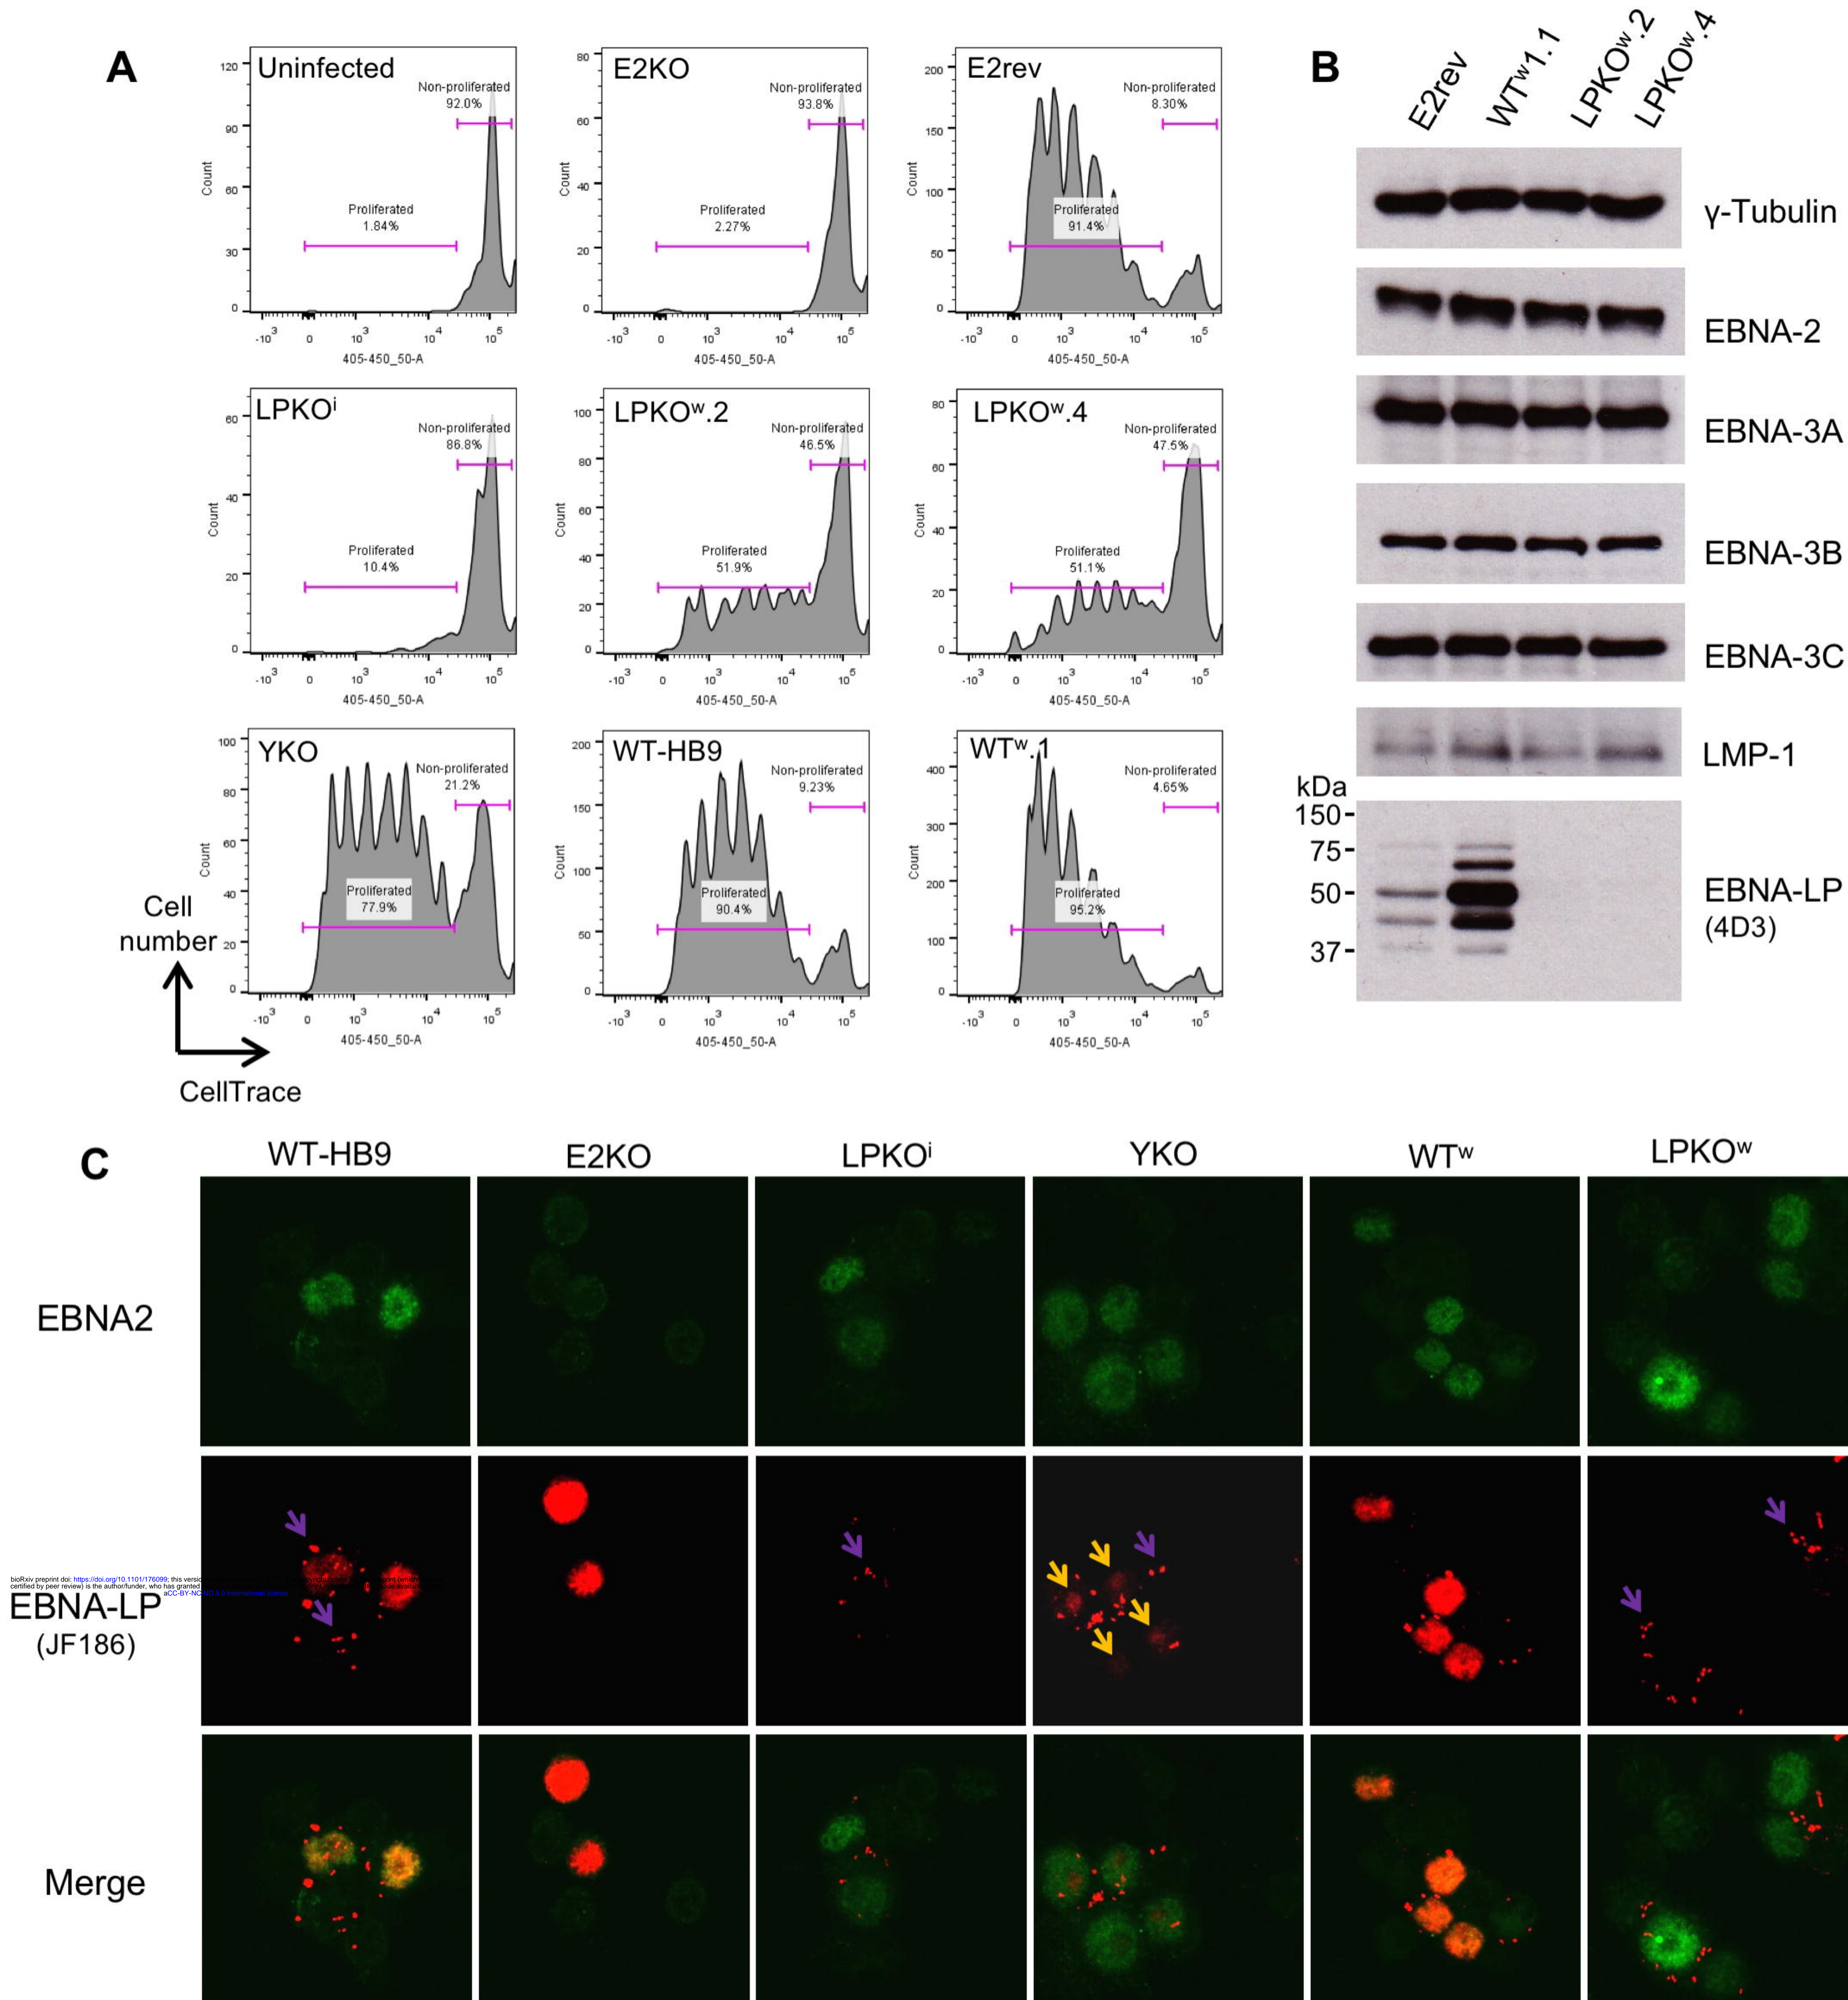

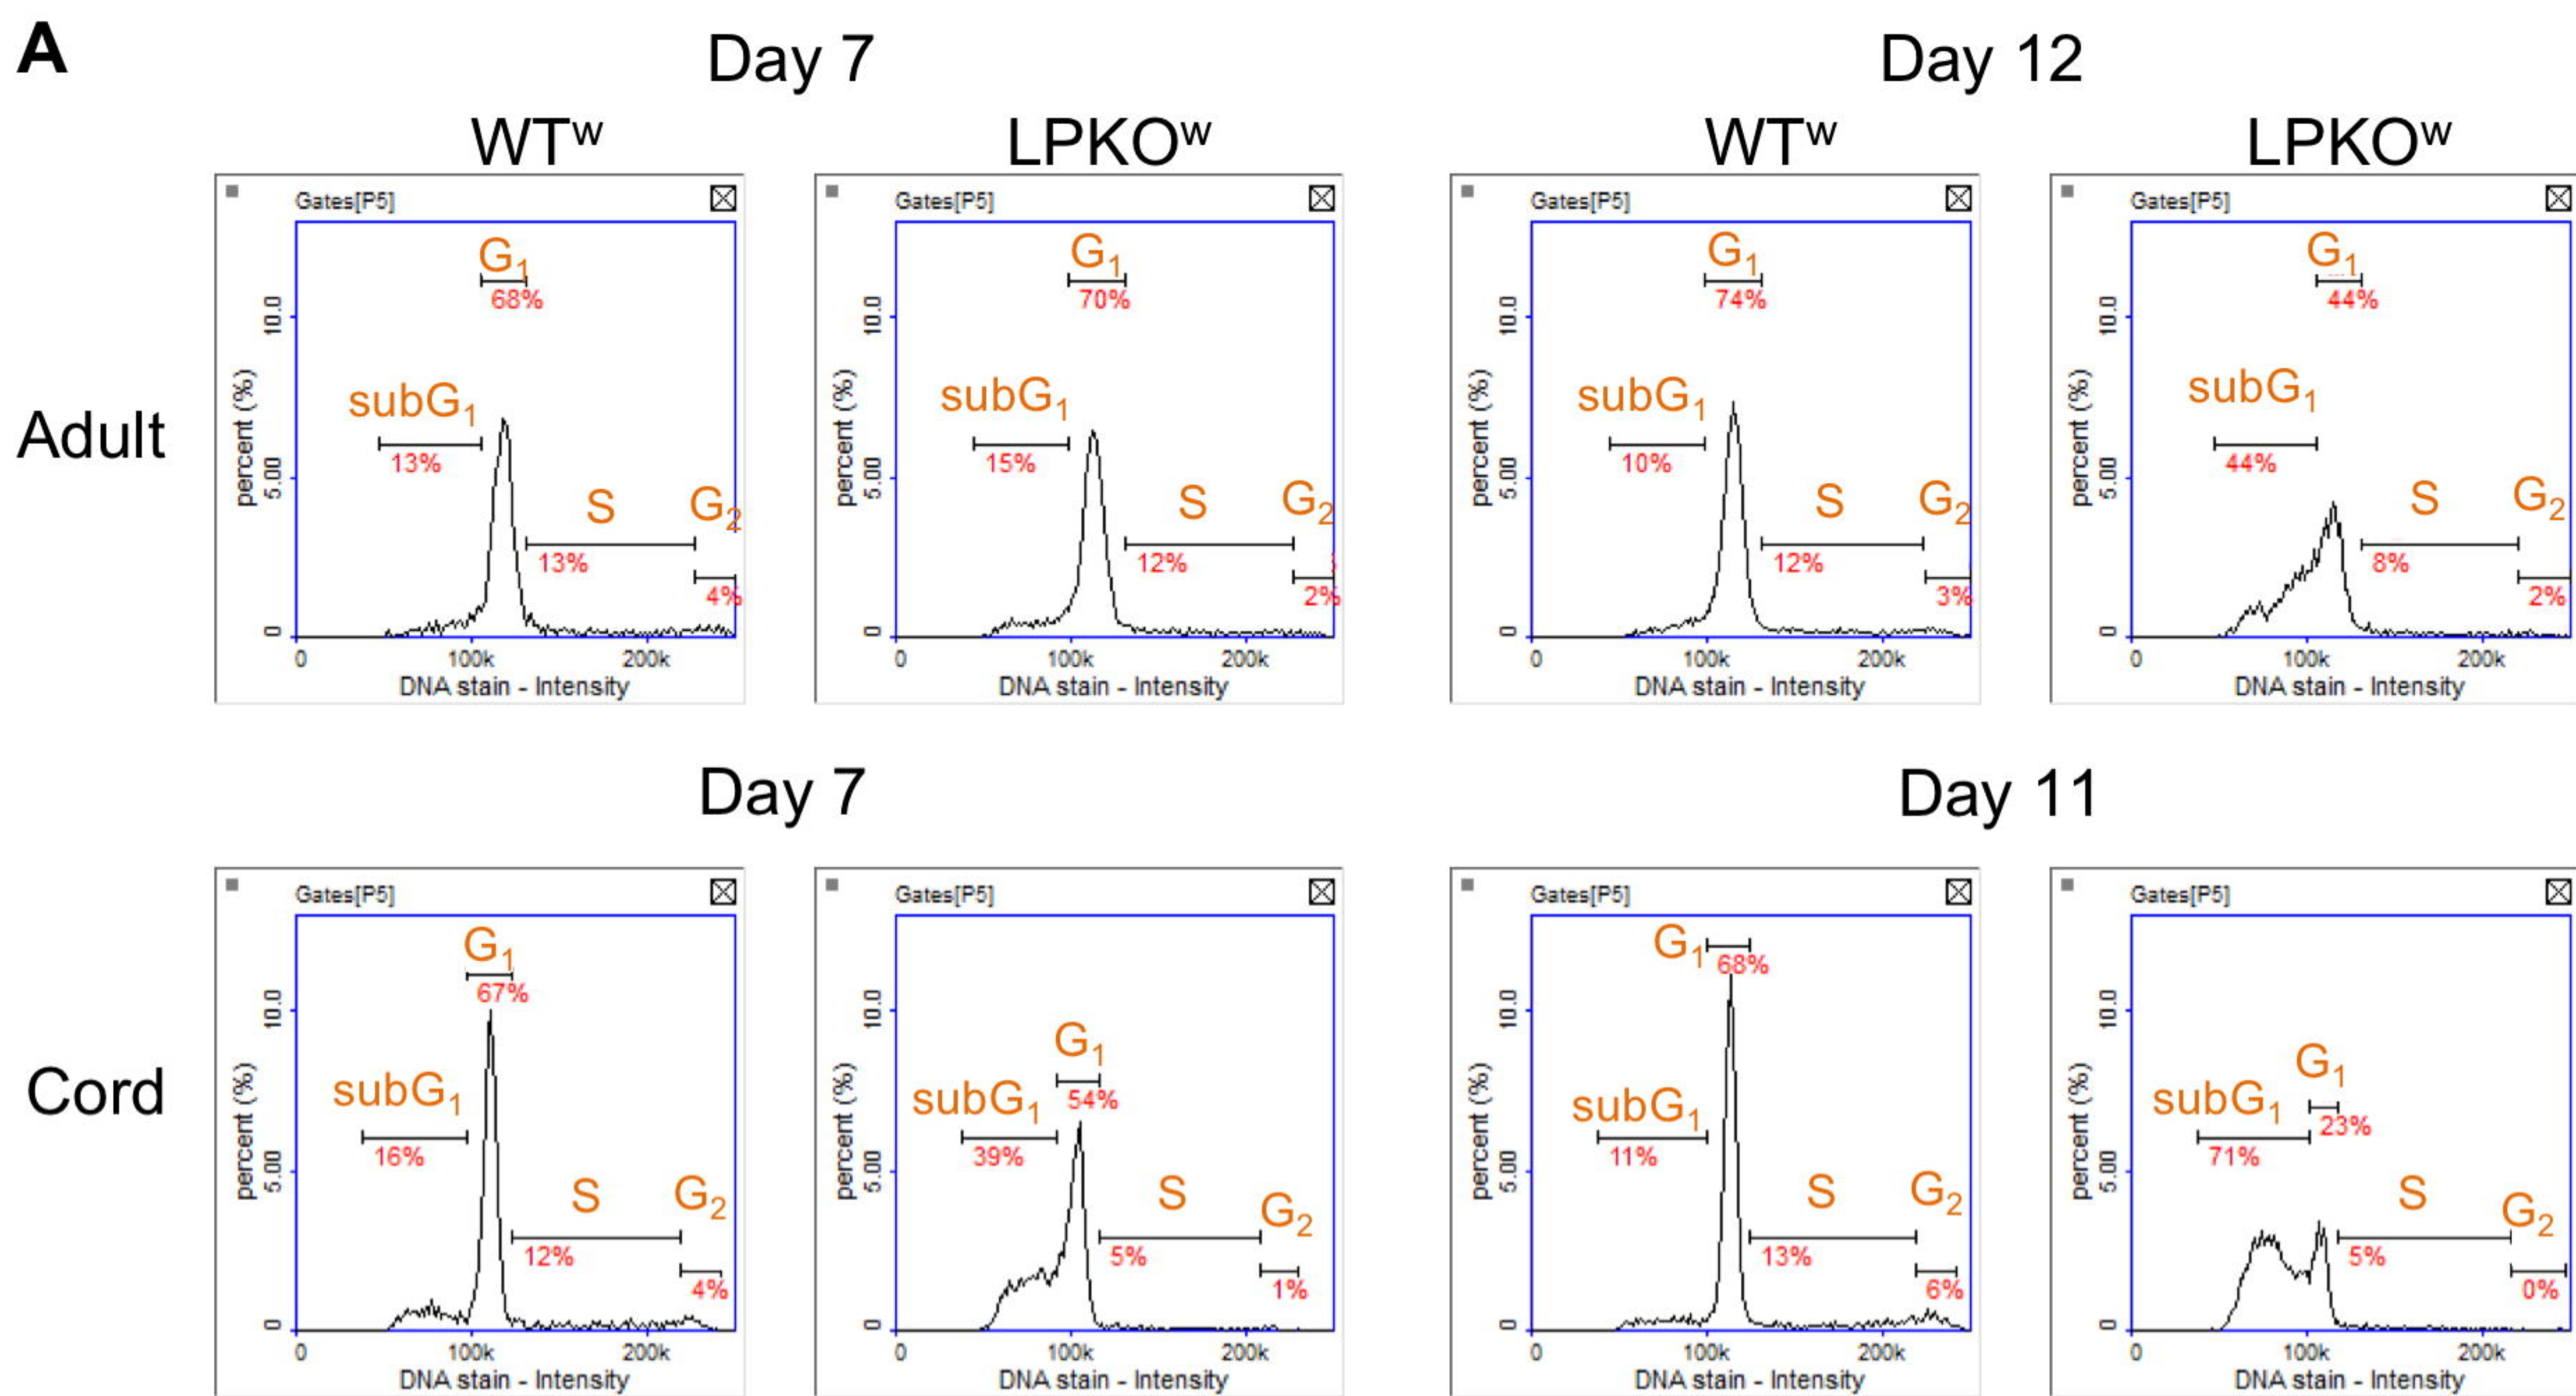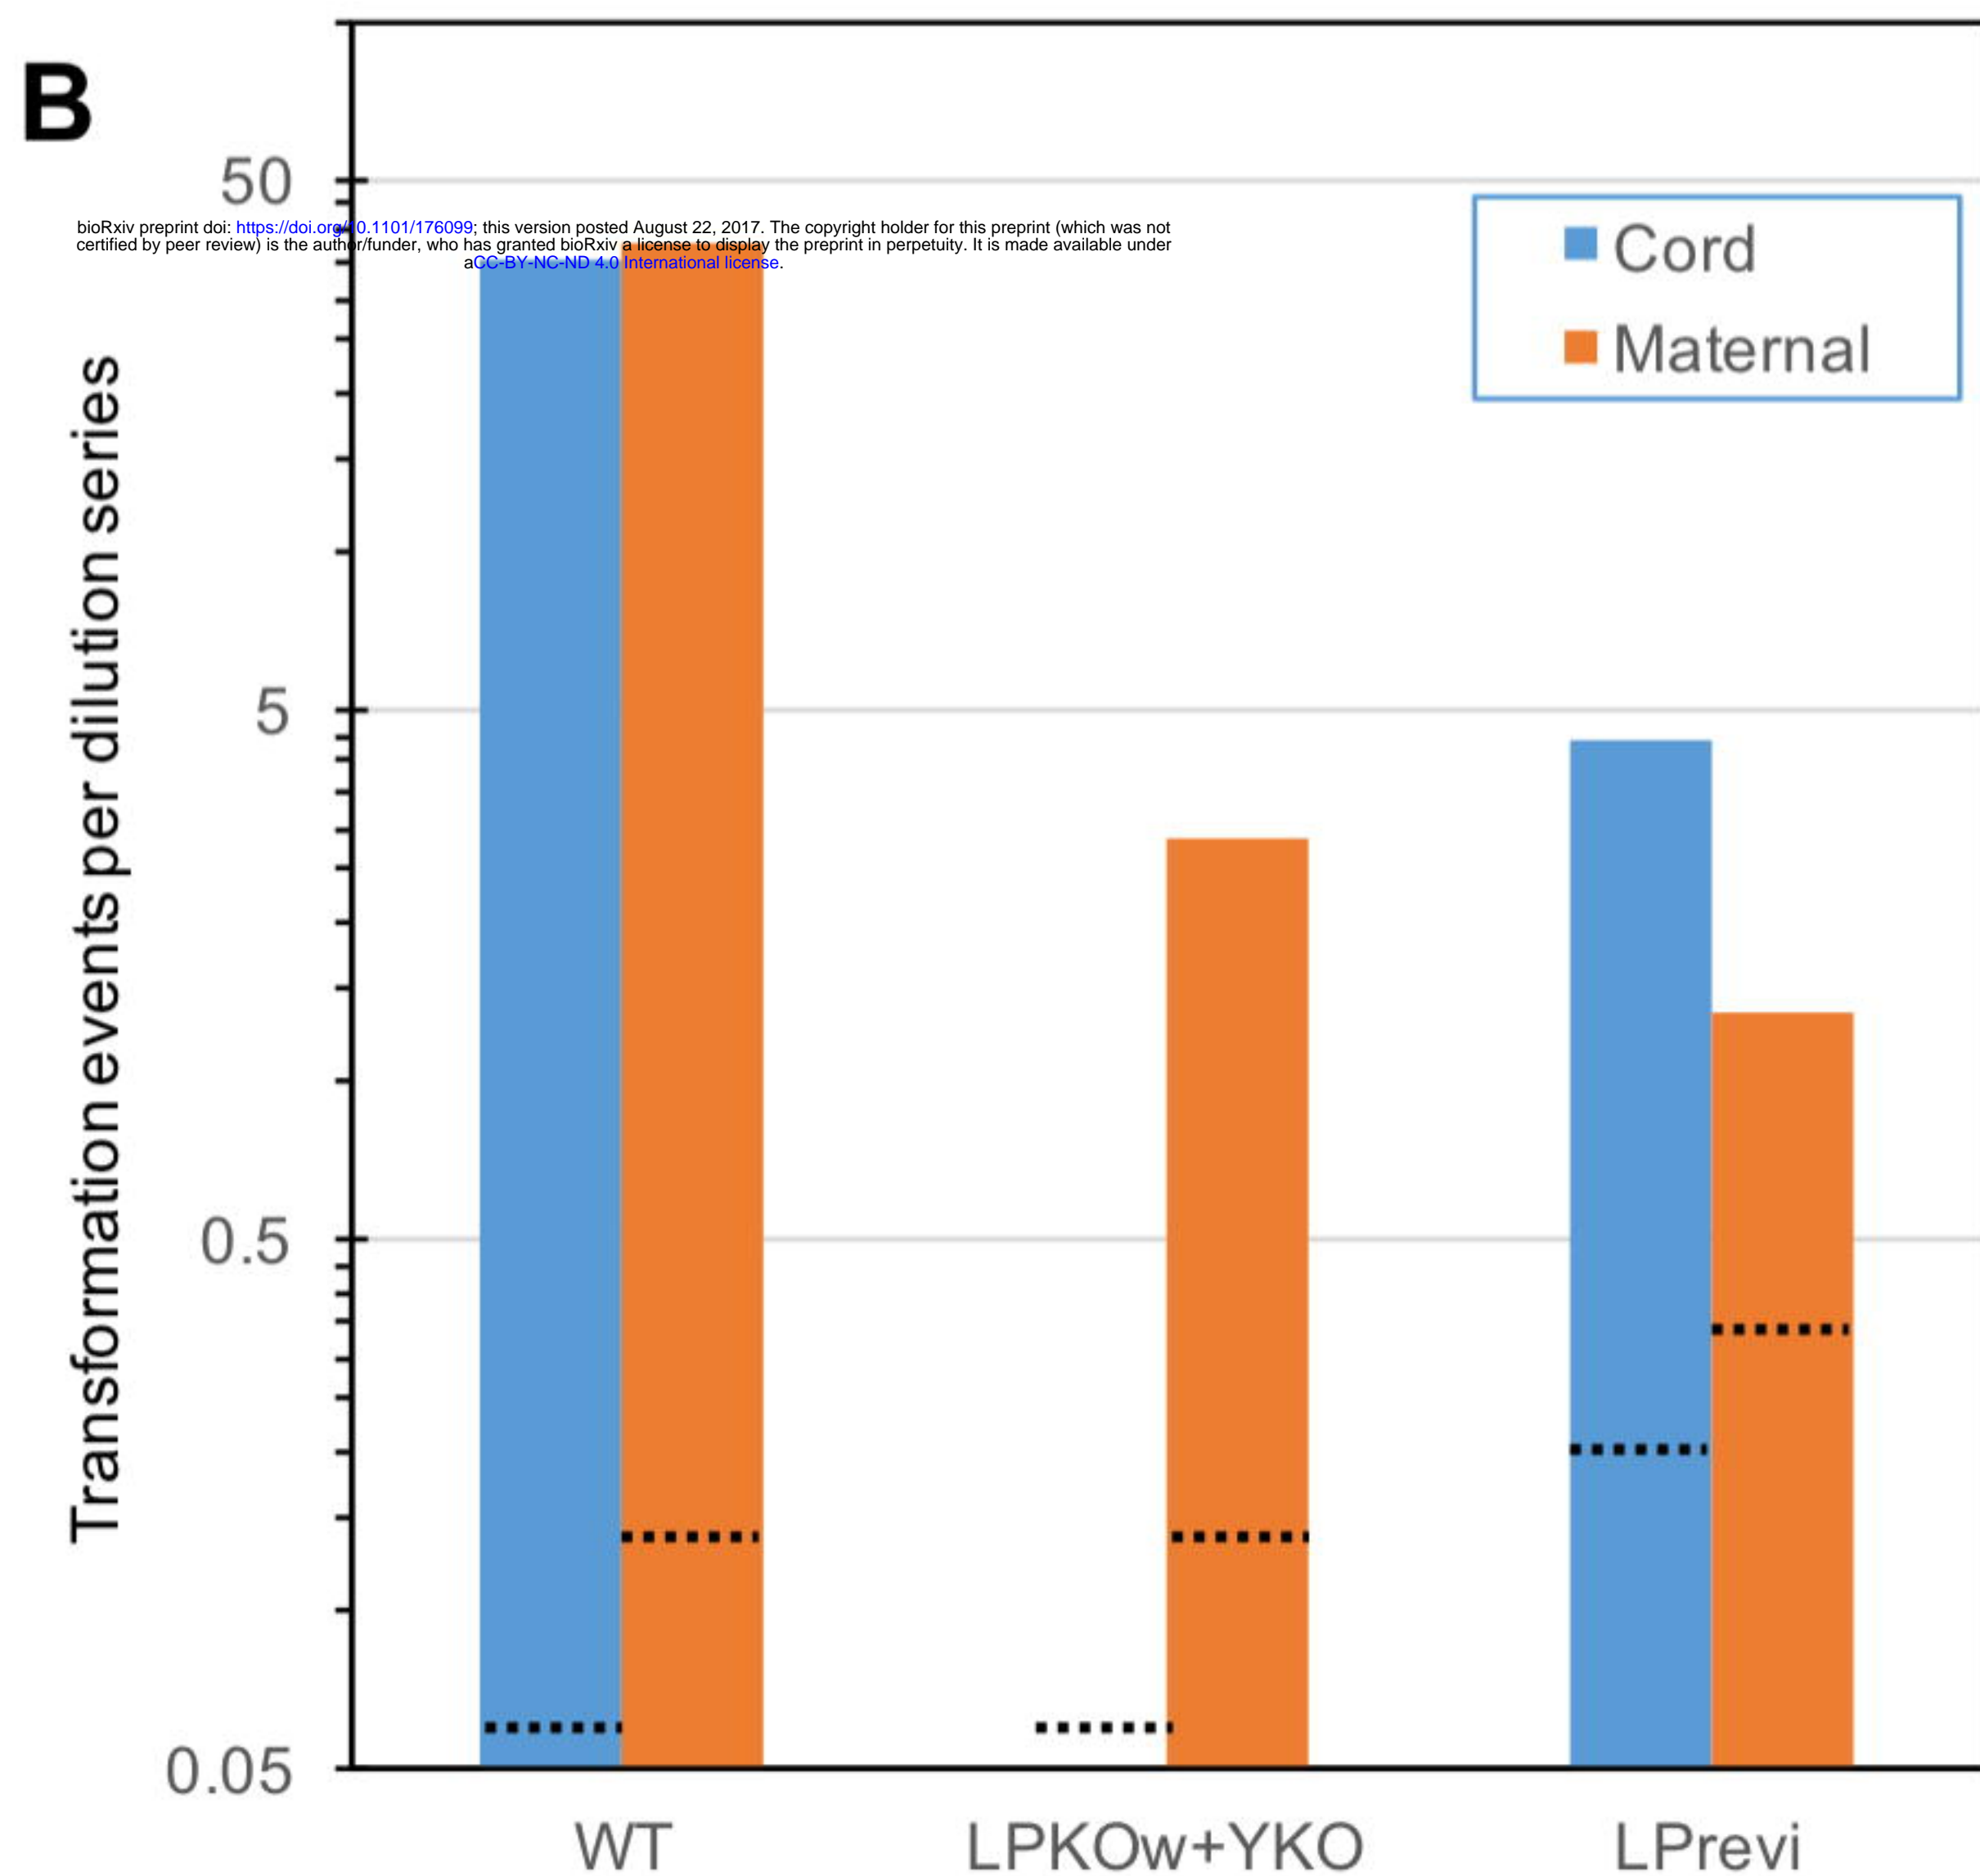

**Fig 4. EBNA-LP mutants are defective at transforming B cells from cord blood. A.** Cell cycle profiles of CD19<sup>+</sup>-sorted adult and cord cells infected with WT<sup>w</sup> or LPKO<sup>w</sup> viruses. Graph shows the DNA quantity per cell (from DAPI staining) **B.** Transformation efficiencies for each infection were calculated from two-fold dilutions of infected cells (see Methods). These efficiencies were averaged for each virus group in each cell type across 3 (maternal – orange bar) or 5 (cord – blue bar) infections per virus. Black lines indicate the sensitivity of the analysis for each virus – ie the efficiency that would occur if only one well across all of the infections were positive.

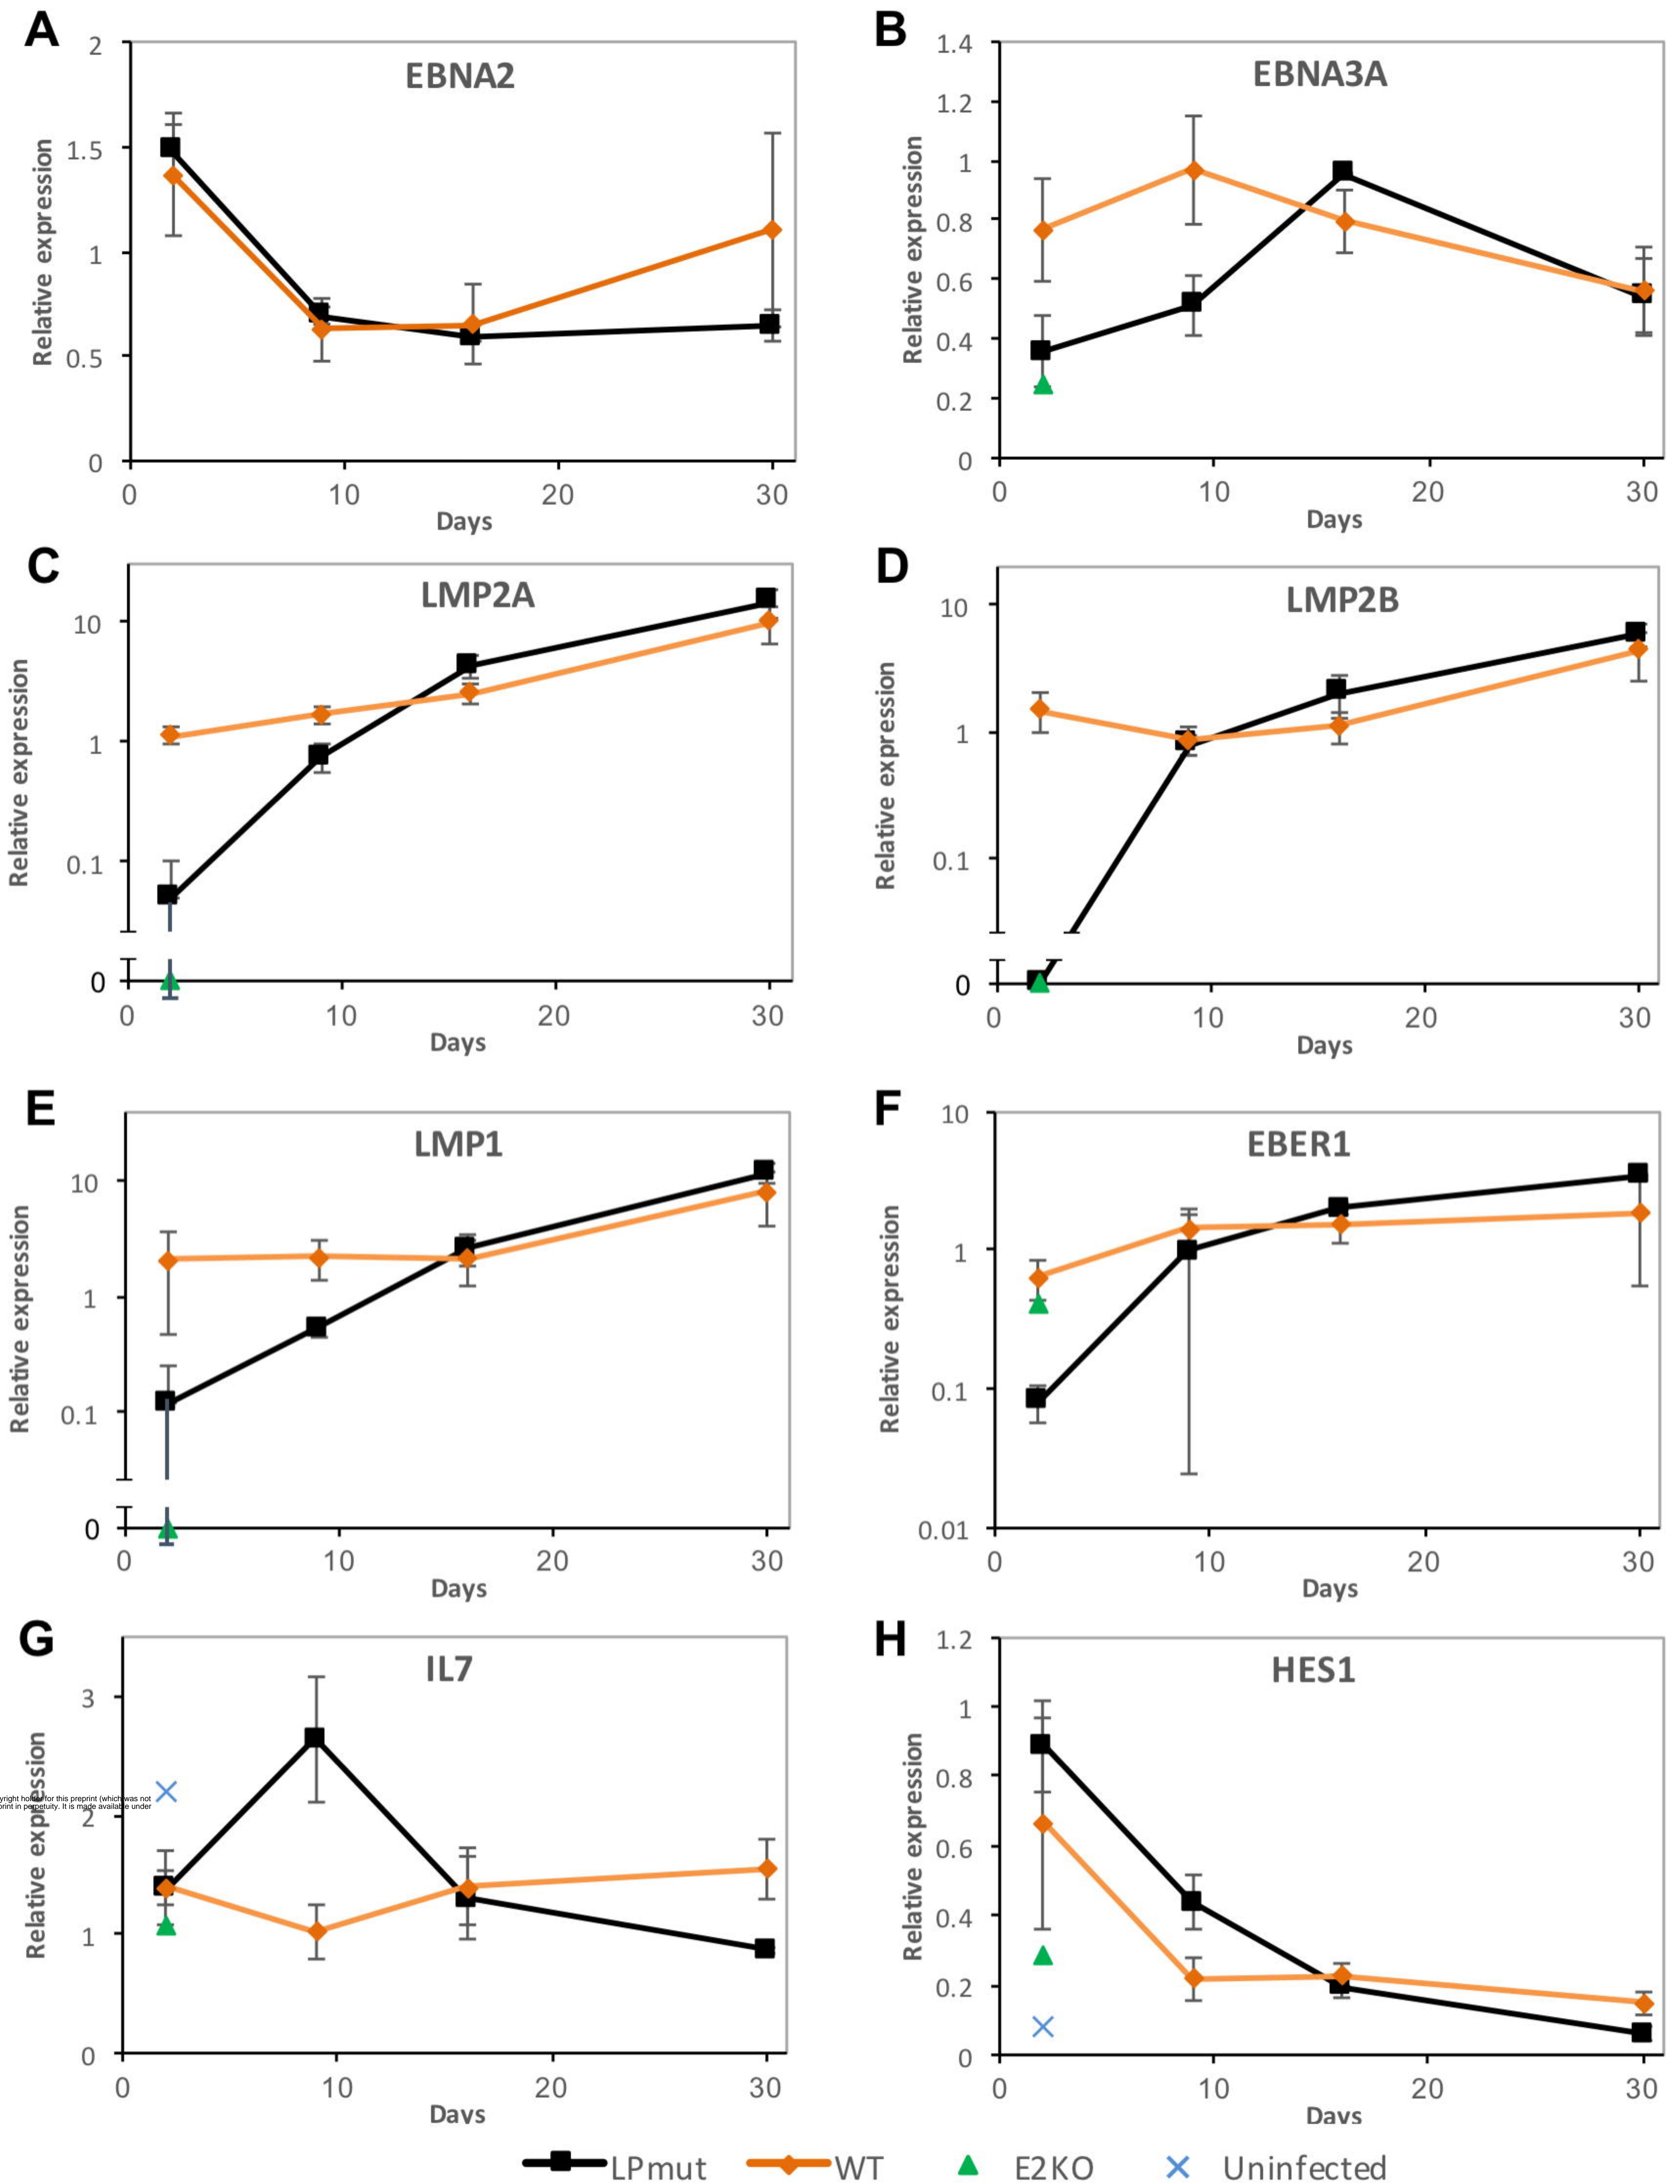

**Fig 5. Time course for virus and host gene expression after EBNA-LP and EBNA2 mutant virus infections.** Graphs show levels of virus and host transcripts as a time course after infection of resting B cells. Infections are grouped as either 'wild-type' (comprising HB9, WT<sup>w</sup>, Yrev, E2rev and LPrev<sup>i</sup>) or EBNA-LP mutants (LPKO<sup>i</sup>, LPKO<sup>w</sup> and YKO), since these groups of mutants showed consistent phenotypes. These are compared with E2KO-infected and uninfected cells on day 2, as indicated by the key. Transcript levels (measured by qPCR) are expressed relative to the level for the HB9 wild-type infection on day 2. Error bars show  $\pm 1$  standard deviation of the gene level for each group. Note that EBNA2 transcript level in E2KO infection was  $>10$ , so is omitted. EBNA3A transcript level (B) is therefore shown relative to the EBNA2 transcript level, since they share promoters. Broken axes (C-E) are used to allow zero values to be visualised on an otherwise logarithmic axis. For virus transcripts, uninfected B cells did not show significant levels of viral transcripts (i.e. are effectively zero) so are not shown. Later time points have fewer EBNA-LP mutant samples as some knockouts did not survive.



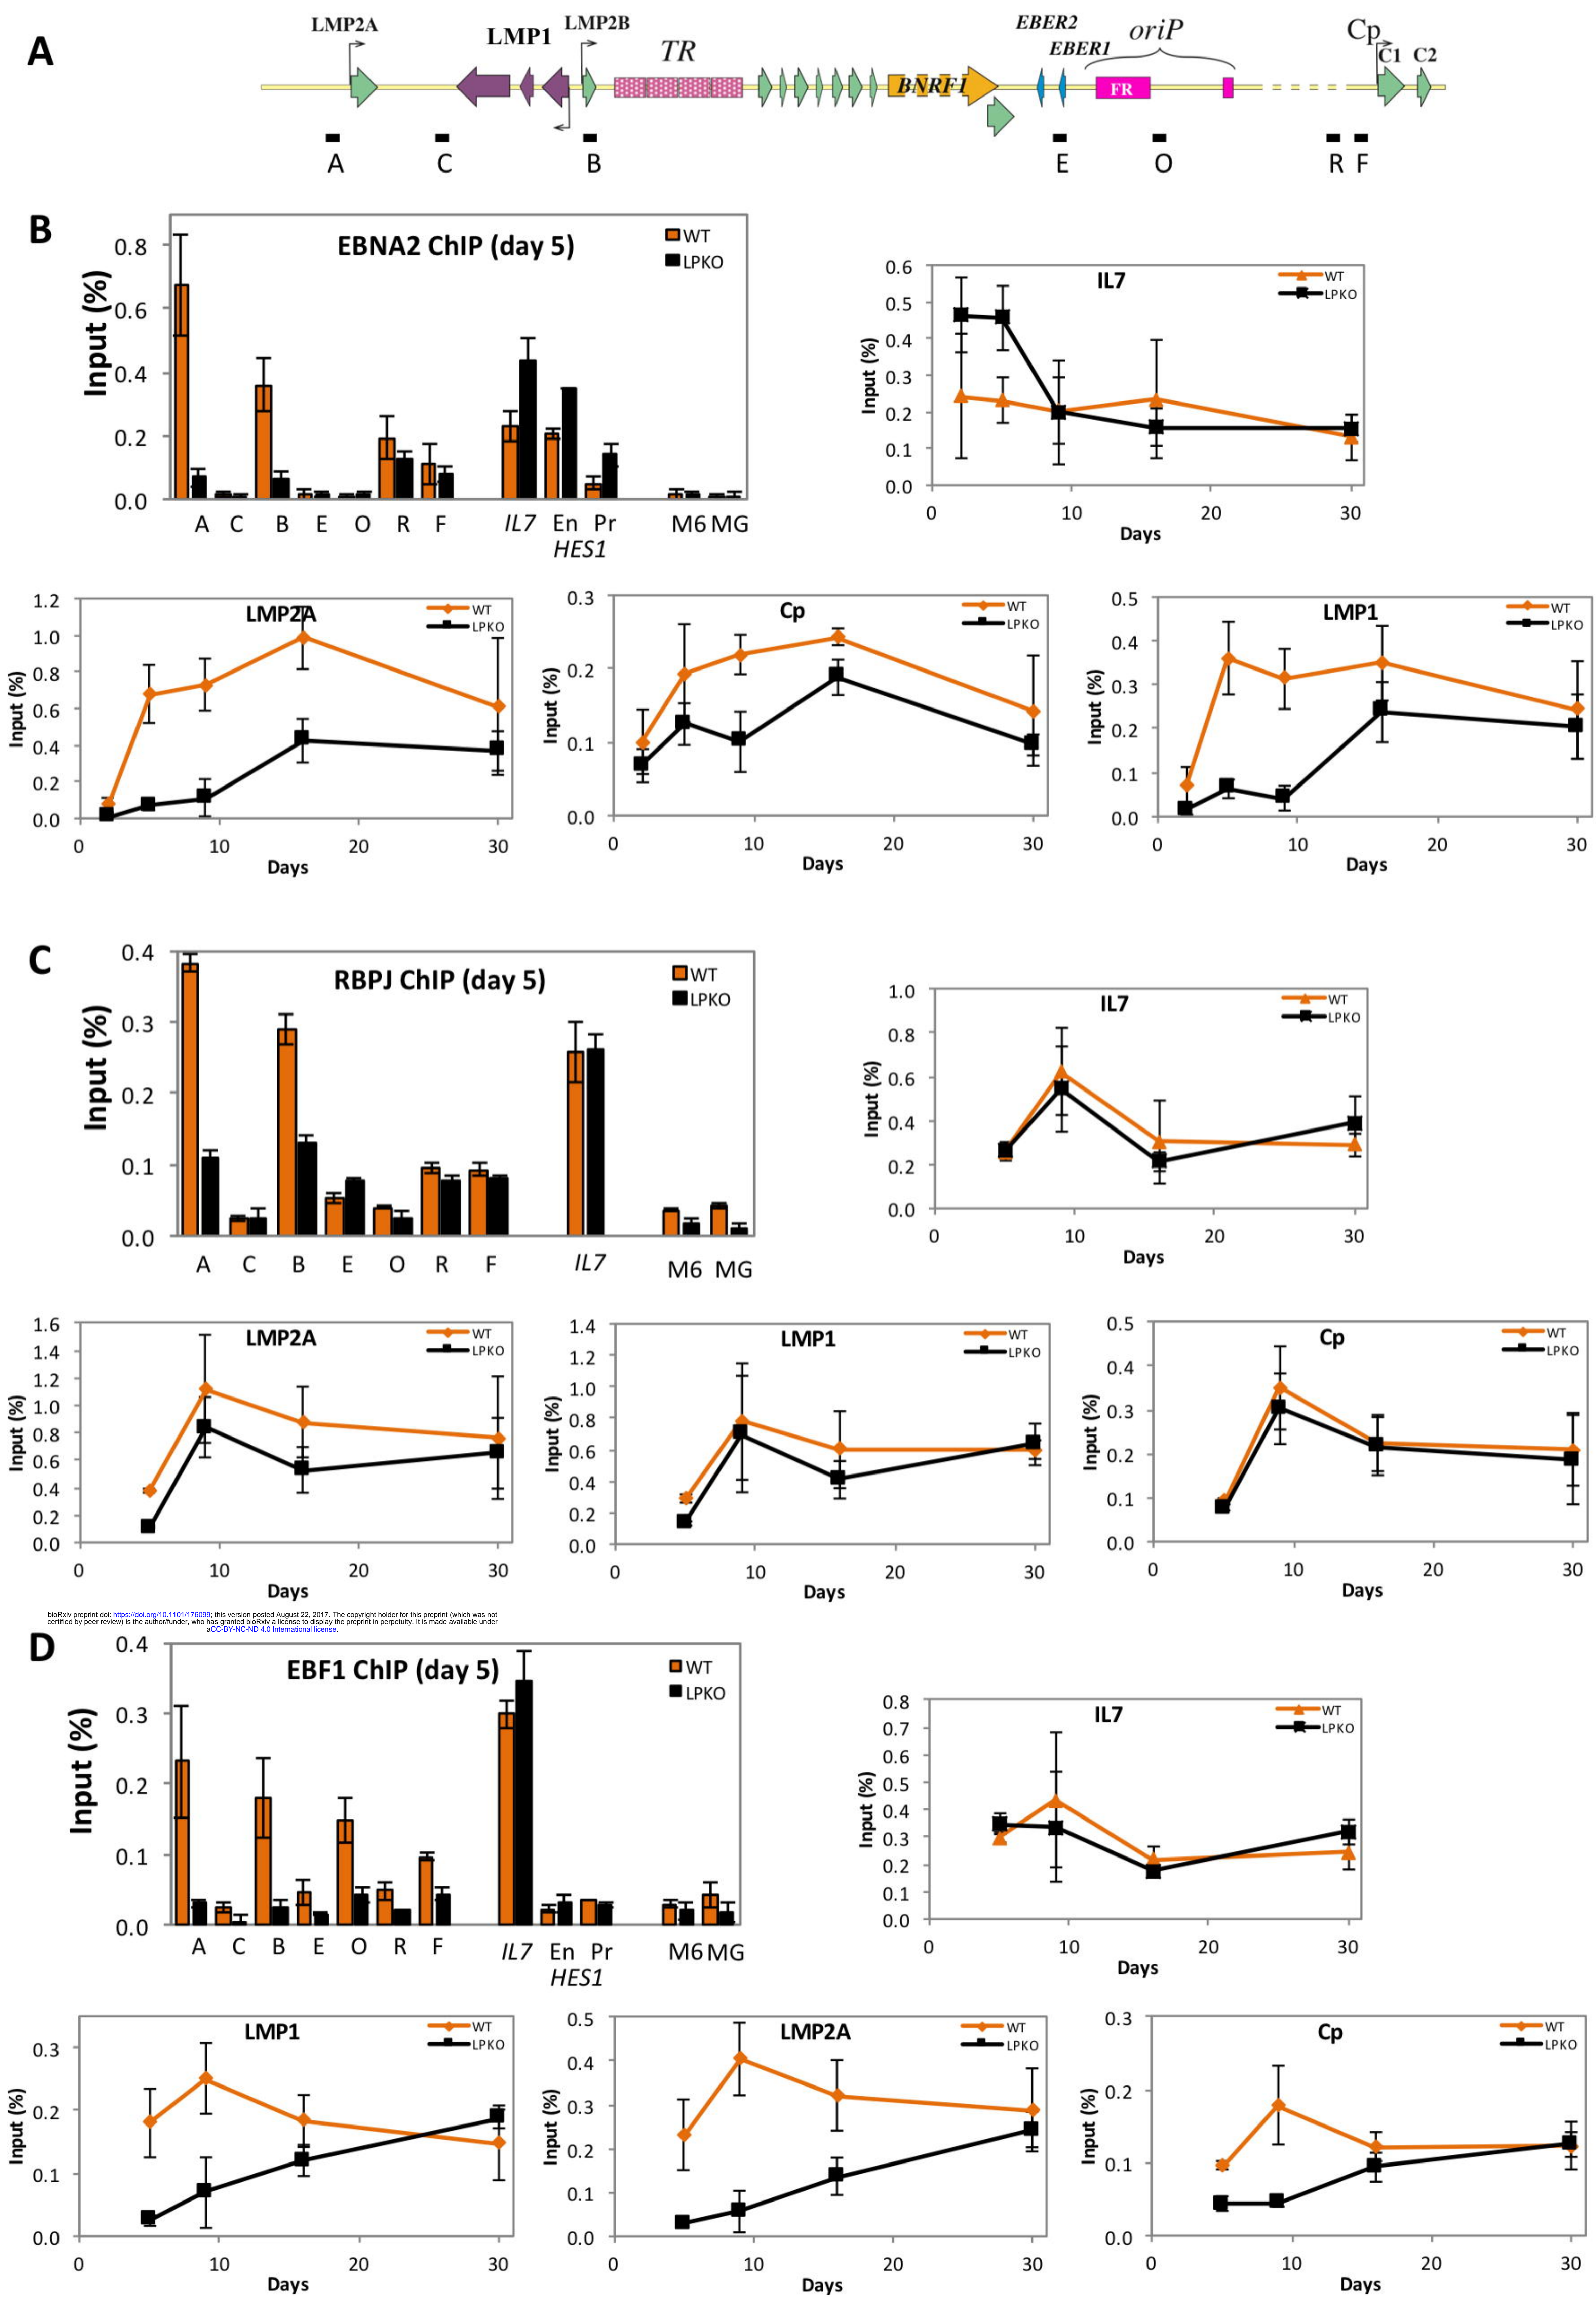

**Fig 6. Binding of EBNA2, RBPJ and EBF1 to viral and host loci.** ChIP analyses of EBNA2, RBPJ and EBF1 at promoters regulated by EBNA2 in LPKO<sup>w</sup>- and WT<sup>w</sup>-infected cells. EBV ChIP assays are shown positionally as letters in the schematic **A**. Data for ChIP of EBNA2 (**B**), RBPJ (**C**), and EBF1 (**D**) are shown for all assays on day 5 post infection with infection with WT<sup>w</sup> (orange) and LPKO<sup>w</sup> (black), and then for IL7, LMP1 (assay B), LMP2A (assay A) and Cp (assay R).
